# Supplementary material for: Investigation of the Multi-Target Mechanism of Guanxin-Shutong Capsule in Cerebrovascular Diseases: A Systems Pharmacology and Experimental Assessment
Source: Front Pharmacol. 2021 May 13;12:650770. doi: 10.3389/fphar.2021.650770 (PMC8155632; doi:10.3389/fphar.2021.650770)
Supplement: Supplementary file 4 [file Table6.XLSX]

## Sheet: BP-1515
Supplementary Table S6 | The BP items of GO enrichment analysis for the 55 common targets
ID	Description	GeneRatio	BgRatio	pvalue	p.adjust	qvalue	GeneID	Count
GO:0006979	response to oxidative stress	21/55	451/18670	2.75256e-20	8.74489e-17	3.53197e-17	SOD1/TNF/COL1A1/TP53/APP/EDN1/JUN/MMP2/HMOX1/BCL2/MMP9/PTGS1/MAPK1/NOS3/PTGS2/SNCA/CASP3/HBA2/RELA/HIF1A/ABCC2	21
GO:0032496	response to lipopolysaccharide	18/55	330/18670	1.42264e-18	2.25987e-15	9.12739e-16	TNF/SERPINE1/EDN1/ICAM1/JUN/CCL3/CCL2/CNR1/NFKBIA/MAPK1/NOS3/CNR2/PTGS2/SNCA/CASP3/CASP9/RELA/ABCC2	18
GO:0002237	response to molecule of bacterial origin	18/55	343/18670	2.83316e-18	3.00031e-15	1.2118e-15	TNF/SERPINE1/EDN1/ICAM1/JUN/CCL3/CCL2/CNR1/NFKBIA/MAPK1/NOS3/CNR2/PTGS2/SNCA/CASP3/CASP9/RELA/ABCC2	18
GO:0051402	neuron apoptotic process	16/55	239/18670	5.9939e-18	4.76065e-15	1.92278e-15	SOD1/TNF/TP53/APP/JUN/NEFL/NGFR/HMOX1/CCL3/BCL2/CCL2/SNCA/CASP3/CASP9/BCL2L1/HIF1A	16
GO:0046677	response to antibiotic	17/55	327/18670	3.39065e-17	2.15442e-14	8.70148e-15	SOD1/COL1A1/TP53/EDN1/ICAM1/JUN/NEFL/HMOX1/BCL2/DRD2/CNR1/STAT3/CASP3/CASP9/HBA2/RELA/BCL2L1	17
GO:0070997	neuron death	17/55	348/18670	9.62208e-17	5.09489e-14	2.05777e-14	SOD1/TNF/TP53/APP/JUN/NEFL/NGFR/HMOX1/CCL3/BCL2/CCL2/SNCA/STAT3/CASP3/CASP9/BCL2L1/HIF1A	17
GO:0043523	regulation of neuron apoptotic process	14/55	210/18670	9.73126e-16	4.4166e-13	1.78382e-13	SOD1/TNF/TP53/JUN/NEFL/HMOX1/CCL3/BCL2/CCL2/SNCA/CASP3/CASP9/BCL2L1/HIF1A	14
GO:0000302	response to reactive oxygen species	14/55	232/18670	3.91522e-15	1.55483e-12	6.2798e-13	SOD1/TNF/COL1A1/EDN1/JUN/MMP2/HMOX1/BCL2/MMP9/MAPK1/NOS3/CASP3/HBA2/RELA	14
GO:0010038	response to metal ion	16/55	364/18670	4.68137e-15	1.65252e-12	6.67438e-13	SOD1/APP/EDN1/ICAM1/JUN/HMOX1/BCL2/DRD2/MMP9/MAPK1/PTGS2/SNCA/CASP3/CASP9/HIF1A/ABCC2	16
GO:1901214	regulation of neuron death	15/55	313/18670	1.08122e-14	3.43505e-12	1.38738e-12	SOD1/TNF/TP53/JUN/NEFL/HMOX1/CCL3/BCL2/CCL2/SNCA/STAT3/CASP3/CASP9/BCL2L1/HIF1A	15
GO:0007568	aging	15/55	321/18670	1.56672e-14	3.92555e-12	1.58549e-12	SOD1/TP53/APP/SERPINE1/EDN1/ICAM1/JUN/BCL2/CNR1/MAPK1/PTGS2/SNCA/STAT3/CASP9/RELA	15
GO:0035094	response to nicotine	9/55	49/18670	1.57668e-14	3.92555e-12	1.58549e-12	TNF/EDN1/HMOX1/BCL2/DRD2/CNR1/MAPK1/CASP3/RELA	9
GO:0070482	response to oxygen levels	16/55	394/18670	1.6063e-14	3.92555e-12	1.58549e-12	PLAU/COL1A1/TP53/EDN1/ICAM1/MMP2/F7/HMOX1/BCL2/DRD2/VEGFA/EDNRA/DPP4/PTGS2/CASP3/HIF1A	16
GO:0001666	response to hypoxia	15/55	359/18670	8.04716e-14	1.82613e-11	7.37556e-12	PLAU/TP53/EDN1/ICAM1/MMP2/F7/HMOX1/BCL2/DRD2/VEGFA/EDNRA/DPP4/PTGS2/CASP3/HIF1A	15
GO:0009410	response to xenobiotic stimulus	14/55	292/18670	9.40821e-14	1.99266e-11	8.04814e-12	SOD1/EDN1/ICAM1/F7/GSTM1/DRD2/CNR1/PTGS1/CYP2C19/CNR2/SNCA/CASP9/RELA/ABCC2	14
GO:0036293	response to decreased oxygen levels	15/55	370/18670	1.24846e-13	2.47898e-11	1.00123e-11	PLAU/TP53/EDN1/ICAM1/MMP2/F7/HMOX1/BCL2/DRD2/VEGFA/EDNRA/DPP4/PTGS2/CASP3/HIF1A	15
GO:0072593	reactive oxygen species metabolic process	13/55	284/18670	1.45595e-12	2.72091e-10	1.09895e-10	SOD1/F2/TNF/TP53/EDN1/ICAM1/BCL2/NOS3/PTGS2/SNCA/STAT3/HBA2/HIF1A	13
GO:2001234	negative regulation of apoptotic signaling pathway	12/55	230/18670	2.52085e-12	4.4493e-10	1.79703e-10	TNF/SERPINE1/ICAM1/HMOX1/BCL2/MMP9/MUC1/NOS3/PTGS2/RELA/BCL2L1/HIF1A	12
GO:0034599	cellular response to oxidative stress	13/55	302/18670	3.16868e-12	5.29837e-10	2.13996e-10	SOD1/TNF/TP53/JUN/MMP2/HMOX1/BCL2/MMP9/MAPK1/NOS3/SNCA/RELA/HIF1A	13
GO:0008217	regulation of blood pressure	11/55	182/18670	4.59612e-12	7.30093e-10	2.94877e-10	SOD1/EDN1/HMOX1/EDN3/DRD2/CNR1/PTGS1/EDNRA/NOS3/PTGS2/ECE1	11
GO:2001233	regulation of apoptotic signaling pathway	14/55	406/18670	8.19402e-12	1.23964e-09	5.00677e-10	SOD1/TNF/TP53/SERPINE1/ICAM1/HMOX1/BCL2/MMP9/MUC1/NOS3/PTGS2/RELA/BCL2L1/HIF1A	14
GO:0050900	leukocyte migration	15/55	499/18670	9.17717e-12	1.32527e-09	5.35262e-10	F2/TNF/COL1A1/MMP1/APP/SERPINE1/EDN1/ICAM1/F7/HMOX1/CCL3/CCL2/EDN3/VEGFA/CNR2	15
GO:2000377	regulation of reactive oxygen species metabolic process	11/55	195/18670	9.74506e-12	1.34609e-09	5.43672e-10	SOD1/F2/TNF/TP53/EDN1/ICAM1/BCL2/PTGS2/SNCA/STAT3/HIF1A	11
GO:0002685	regulation of leukocyte migration	11/55	196/18670	1.0302e-11	1.36373e-09	5.50798e-10	TNF/APP/SERPINE1/EDN1/ICAM1/F7/HMOX1/CCL3/CCL2/EDN3/VEGFA	11
GO:0097193	intrinsic apoptotic signaling pathway	12/55	289/18670	3.65387e-11	4.64333e-09	1.87539e-09	SOD1/TNF/TP53/HMOX1/BCL2/MMP9/MUC1/PTGS2/CASP3/CASP9/BCL2L1/HIF1A	12
GO:0031960	response to corticosteroid	10/55	162/18670	3.82452e-11	4.67327e-09	1.88749e-09	TNF/COL1A1/EDN1/ICAM1/NEFL/BCL2/PTGS2/CASP3/CASP9/ABCC2	10
GO:0043200	response to amino acid	9/55	113/18670	3.97355e-11	4.67555e-09	1.88841e-09	TNF/COL1A1/EDN1/ICAM1/MMP2/F7/CASP3/RELA/BCL2L1	9
GO:0003018	vascular process in circulatory system	10/55	173/18670	7.33377e-11	8.32121e-09	3.36085e-09	SOD1/EDN1/ICAM1/HMOX1/EDN3/VEGFA/EDNRA/NOS3/PTGS2/ECE1	10
GO:0071216	cellular response to biotic stimulus	11/55	236/18670	7.64967e-11	8.38034e-09	3.38474e-09	TNF/TP53/SERPINE1/ICAM1/CCL3/CCL2/NFKBIA/MAPK1/NOS3/RELA/ABCC2	11
GO:0034612	response to tumor necrosis factor	12/55	312/18670	8.86828e-11	9.39151e-09	3.79314e-09	TNF/COL1A1/EDN1/ICAM1/CCL3/CCL2/NFKBIA/MAPK1/PTGS2/CASP3/RELA/ABCC2	12
GO:0002687	positive regulation of leukocyte migration	9/55	128/18670	1.22709e-10	1.25757e-08	5.07918e-09	TNF/APP/SERPINE1/EDN1/ICAM1/F7/CCL3/EDN3/VEGFA	9
GO:0032103	positive regulation of response to external stimulus	12/55	323/18670	1.32231e-10	1.31281e-08	5.30229e-09	F2/TNF/SERPINE1/EDN1/F7/CCL3/EDN3/VEGFA/CNR1/NFKBIA/PTGS2/SNCA	12
GO:0001101	response to acid chemical	12/55	343/18670	2.63641e-10	2.53815e-08	1.02513e-08	TNF/COL1A1/EDN1/ICAM1/MMP2/F7/VEGFA/PTGS2/CASP3/RELA/BCL2L1/ABCC2	12
GO:0035296	regulation of tube diameter	9/55	143/18670	3.31796e-10	2.9281e-08	1.18263e-08	SOD1/EDN1/ICAM1/HMOX1/EDN3/EDNRA/NOS3/PTGS2/ECE1	9
GO:0050880	regulation of blood vessel size	9/55	143/18670	3.31796e-10	2.9281e-08	1.18263e-08	SOD1/EDN1/ICAM1/HMOX1/EDN3/EDNRA/NOS3/PTGS2/ECE1	9
GO:0097746	regulation of blood vessel diameter	9/55	143/18670	3.31796e-10	2.9281e-08	1.18263e-08	SOD1/EDN1/ICAM1/HMOX1/EDN3/EDNRA/NOS3/PTGS2/ECE1	9
GO:1902895	positive regulation of pri-miRNA transcription by RNA polymerase II	6/55	31/18670	3.43275e-10	2.94753e-08	1.19048e-08	TP53/JUN/NGFR/STAT3/RELA/HIF1A	6
GO:0035150	regulation of tube size	9/55	144/18670	3.53128e-10	2.95233e-08	1.19242e-08	SOD1/EDN1/ICAM1/HMOX1/EDN3/EDNRA/NOS3/PTGS2/ECE1	9
GO:0008585	female gonad development	8/55	96/18670	3.62519e-10	2.95313e-08	1.19274e-08	SOD1/ESR1/ICAM1/BCL2/VEGFA/NOS3/CASP3/BCL2L1	8
GO:0071222	cellular response to lipopolysaccharide	10/55	205/18670	3.89037e-10	3.08993e-08	1.24799e-08	TNF/SERPINE1/ICAM1/CCL3/CCL2/NFKBIA/MAPK1/NOS3/RELA/ABCC2	10
GO:0051384	response to glucocorticoid	9/55	146/18670	3.99445e-10	3.09521e-08	1.25013e-08	TNF/EDN1/ICAM1/NEFL/BCL2/PTGS2/CASP3/CASP9/ABCC2	9
GO:0043524	negative regulation of neuron apoptotic process	9/55	147/18670	4.24549e-10	3.16037e-08	1.27644e-08	SOD1/JUN/NEFL/HMOX1/BCL2/CCL2/SNCA/BCL2L1/HIF1A	9
GO:0070555	response to interleukin-1	10/55	207/18670	4.27749e-10	3.16037e-08	1.27644e-08	APP/EDN1/ICAM1/CCL3/CCL2/NFKBIA/SNCA/RELA/HIF1A/ABCC2	10
GO:1901215	negative regulation of neuron death	10/55	208/18670	4.48361e-10	3.23737e-08	1.30754e-08	SOD1/JUN/NEFL/HMOX1/BCL2/CCL2/SNCA/STAT3/BCL2L1/HIF1A	10
GO:0071219	cellular response to molecule of bacterial origin	10/55	212/18670	5.3994e-10	3.77333e-08	1.52401e-08	TNF/SERPINE1/ICAM1/CCL3/CCL2/NFKBIA/MAPK1/NOS3/RELA/ABCC2	10
GO:0046545	development of primary female sexual characteristics	8/55	101/18670	5.46342e-10	3.77333e-08	1.52401e-08	SOD1/ESR1/ICAM1/BCL2/VEGFA/NOS3/CASP3/BCL2L1	8
GO:2000379	positive regulation of reactive oxygen species metabolic process	8/55	102/18670	5.9151e-10	3.99836e-08	1.6149e-08	SOD1/F2/TNF/TP53/EDN1/ICAM1/PTGS2/SNCA	8
GO:2001237	negative regulation of extrinsic apoptotic signaling pathway	8/55	104/18670	6.91652e-10	4.57787e-08	1.84896e-08	TNF/SERPINE1/ICAM1/HMOX1/BCL2/NOS3/RELA/BCL2L1	8
GO:0044706	multi-multicellular organism process	10/55	222/18670	8.45675e-10	5.48308e-08	2.21456e-08	SOD1/ESR1/EDN1/MMP2/BCL2/MMP9/CNR1/MAPK1/PTGS2/ABCC2	10
GO:0097191	extrinsic apoptotic signaling pathway	10/55	224/18670	9.22666e-10	5.86262e-08	2.36785e-08	TNF/SERPINE1/ICAM1/HMOX1/BCL2/NOS3/CASP3/CASP9/RELA/BCL2L1	10
GO:0048545	response to steroid hormone	12/55	385/18670	9.83966e-10	6.12953e-08	2.47565e-08	TNF/COL1A1/ESR1/EDN1/ICAM1/NEFL/BCL2/PTGS2/CASP3/CASP9/RELA/ABCC2	12
GO:0050727	regulation of inflammatory response	13/55	485/18670	1.12188e-09	6.85424e-08	2.76836e-08	SOD1/F2/TNF/ESR1/SERPINE1/CCL3/MMP9/CNR1/NFKBIA/CNR2/PTGS2/SNCA/RELA	13
GO:0046660	female sex differentiation	8/55	115/18670	1.54953e-09	9.28841e-08	3.75149e-08	SOD1/ESR1/ICAM1/BCL2/VEGFA/NOS3/CASP3/BCL2L1	8
GO:1902893	regulation of pri-miRNA transcription by RNA polymerase II	6/55	41/18670	2.04965e-09	1.20587e-07	4.87041e-08	TP53/JUN/NGFR/STAT3/RELA/HIF1A	6
GO:0150076	neuroinflammatory response	7/55	75/18670	2.20502e-09	1.2737e-07	5.14435e-08	TNF/APP/JUN/CCL3/MMP9/PTGS2/SNCA	7
GO:1903409	reactive oxygen species biosynthetic process	8/55	122/18670	2.48316e-09	1.40875e-07	5.68979e-08	SOD1/TNF/EDN1/ICAM1/NOS3/PTGS2/SNCA/STAT3	8
GO:0051090	regulation of DNA-binding transcription factor activity	12/55	432/18670	3.6092e-09	2.01166e-07	8.12488e-08	TNF/ESR1/APP/EDN1/ICAM1/JUN/HMOX1/VEGFA/NFKBIA/MAPK1/STAT3/RELA	12
GO:0071248	cellular response to metal ion	9/55	190/18670	4.11278e-09	2.25281e-07	9.09888e-08	SOD1/APP/EDN1/JUN/HMOX1/MMP9/MAPK1/PTGS2/SNCA	9
GO:0098754	detoxification	8/55	131/18670	4.37167e-09	2.35403e-07	9.5077e-08	SOD1/TNF/GSTM1/PTGS1/NOS3/PTGS2/HBA2/ABCC2	8
GO:0007565	female pregnancy	9/55	192/18670	4.50827e-09	2.38713e-07	9.64137e-08	SOD1/ESR1/MMP2/BCL2/MMP9/CNR1/MAPK1/PTGS2/ABCC2	9
GO:0061614	pri-miRNA transcription by RNA polymerase II	6/55	47/18670	4.82893e-09	2.515e-07	1.01578e-07	TP53/JUN/NGFR/STAT3/RELA/HIF1A	6
GO:0009314	response to radiation	12/55	448/18670	5.42406e-09	2.7794e-07	1.12257e-07	TP53/APP/ICAM1/JUN/BCL2/DRD2/PTGS2/CASP3/CASP9/RELA/BCL2L1/HIF1A	12
GO:0008625	extrinsic apoptotic signaling pathway via death domain receptors	7/55	86/18670	5.82306e-09	2.93648e-07	1.18602e-07	TNF/SERPINE1/ICAM1/HMOX1/BCL2/NOS3/BCL2L1	7
GO:0006874	cellular calcium ion homeostasis	12/55	458/18670	6.94061e-09	3.44536e-07	1.39155e-07	F2/ESR1/APP/EDN1/CCL3/BCL2/EDN3/DRD2/CNR1/EDNRA/SNCA/ATP2C1	12
GO:0001819	positive regulation of cytokine production	12/55	464/18670	8.02435e-09	3.92206e-07	1.58408e-07	SOD1/TNF/APP/SERPINE1/HMOX1/CCL3/DRD2/PTGS2/MMP12/STAT3/RELA/HIF1A	12
GO:0030198	extracellular matrix organization	11/55	368/18670	8.27716e-09	3.98432e-07	1.60923e-07	TNF/COL1A1/TTR/MMP1/APP/SERPINE1/ICAM1/MMP2/MMP9/DPP4/MMP12	11
GO:0035690	cellular response to drug	11/55	369/18670	8.51282e-09	4.0366e-07	1.63034e-07	SOD1/TNF/TP53/EDN1/ICAM1/HMOX1/MAPK1/PTGS2/CASP9/RELA/ABCC2	11
GO:0055074	calcium ion homeostasis	12/55	471/18670	9.47975e-09	4.42899e-07	1.78883e-07	F2/ESR1/APP/EDN1/CCL3/BCL2/EDN3/DRD2/CNR1/EDNRA/SNCA/ATP2C1	12
GO:0042542	response to hydrogen peroxide	8/55	146/18670	1.02934e-08	4.73945e-07	1.91422e-07	SOD1/COL1A1/JUN/HMOX1/BCL2/CASP3/HBA2/RELA	8
GO:1901216	positive regulation of neuron death	7/55	94/18670	1.08945e-08	4.94455e-07	1.99705e-07	TNF/TP53/JUN/CCL3/SNCA/CASP3/CASP9	7
GO:0071356	cellular response to tumor necrosis factor	10/55	291/18670	1.14225e-08	5.04496e-07	2.03761e-07	TNF/COL1A1/EDN1/ICAM1/CCL3/CCL2/NFKBIA/MAPK1/RELA/ABCC2	10
GO:1904645	response to amyloid-beta	6/55	54/18670	1.14333e-08	5.04496e-07	2.03761e-07	APP/ICAM1/NGFR/MMP2/MMP9/MMP12	6
GO:0097327	response to antineoplastic agent	7/55	96/18670	1.26291e-08	5.49624e-07	2.21987e-07	EDN1/ICAM1/NEFL/F7/HMOX1/CASP9/ABCC2	7
GO:0001541	ovarian follicle development	6/55	55/18670	1.28045e-08	5.49726e-07	2.22029e-07	SOD1/ESR1/ICAM1/BCL2/VEGFA/BCL2L1	6
GO:0071241	cellular response to inorganic substance	9/55	217/18670	1.31176e-08	5.5566e-07	2.24426e-07	SOD1/APP/EDN1/JUN/HMOX1/MMP9/MAPK1/PTGS2/SNCA	9
GO:0062013	positive regulation of small molecule metabolic process	8/55	153/18670	1.48724e-08	6.21704e-07	2.511e-07	TNF/APP/NOS3/PTGS2/SNCA/STAT3/VCP/HIF1A	8
GO:0072503	cellular divalent inorganic cation homeostasis	12/55	493/18670	1.57316e-08	6.4908e-07	2.62157e-07	F2/ESR1/APP/EDN1/CCL3/BCL2/EDN3/DRD2/CNR1/EDNRA/SNCA/ATP2C1	12
GO:0043525	positive regulation of neuron apoptotic process	6/55	57/18670	1.59561e-08	6.49905e-07	2.6249e-07	TNF/TP53/JUN/CCL3/CASP3/CASP9	6
GO:2001236	regulation of extrinsic apoptotic signaling pathway	8/55	155/18670	1.64668e-08	6.62217e-07	2.67463e-07	TNF/SERPINE1/ICAM1/HMOX1/BCL2/NOS3/RELA/BCL2L1	8
GO:0031663	lipopolysaccharide-mediated signaling pathway	6/55	58/18670	1.77572e-08	6.96904e-07	2.81473e-07	TNF/CCL3/CCL2/NFKBIA/MAPK1/NOS3	6
GO:0031667	response to nutrient levels	12/55	499/18670	1.79837e-08	6.96904e-07	2.81473e-07	SOD1/COL1A1/TP53/ICAM1/JUN/F7/HMOX1/BCL2/CNR1/MAPK1/PTGS2/RELA	12
GO:0048661	positive regulation of smooth muscle cell proliferation	7/55	101/18670	1.80196e-08	6.96904e-07	2.81473e-07	TNF/EDN1/JUN/MMP2/HMOX1/MMP9/PTGS2	7
GO:0043271	negative regulation of ion transport	8/55	157/18670	1.82068e-08	6.96904e-07	2.81473e-07	ICAM1/BCL2/DRD2/MMP9/CNR1/NOS3/PTGS2/SNCA	8
GO:0008630	intrinsic apoptotic signaling pathway in response to DNA damage	7/55	104/18670	2.21061e-08	8.26247e-07	3.33713e-07	TNF/TP53/HMOX1/BCL2/MUC1/CASP9/BCL2L1	7
GO:0019233	sensory perception of pain	7/55	104/18670	2.21061e-08	8.26247e-07	3.33713e-07	EDN1/CCL3/CCL2/CNR1/MAPK1/CNR2/PTGS2	7
GO:0097305	response to alcohol	9/55	233/18670	2.42928e-08	8.97422e-07	3.6246e-07	SOD1/ICAM1/NEFL/F7/CCL3/DRD2/CNR1/STAT3/BCL2L1	9
GO:2001242	regulation of intrinsic apoptotic signaling pathway	8/55	165/18670	2.68519e-08	9.73028e-07	3.92996e-07	SOD1/TP53/BCL2/MMP9/MUC1/PTGS2/BCL2L1/HIF1A	8
GO:0051341	regulation of oxidoreductase activity	7/55	107/18670	2.6952e-08	9.73028e-07	3.92996e-07	TNF/EDN1/CNR1/NOS3/CNR2/SNCA/HIF1A	7
GO:0031669	cellular response to nutrient levels	9/55	237/18670	2.81378e-08	1.00442e-06	4.05677e-07	SOD1/COL1A1/TP53/ICAM1/JUN/HMOX1/BCL2/MAPK1/PTGS2	9
GO:0030099	myeloid cell differentiation	11/55	416/18670	2.92094e-08	1.03109e-06	4.16447e-07	TNF/APP/JUN/CCL3/MMP9/VEGFA/NFKBIA/STAT3/CASP3/CASP9/HIF1A	11
GO:0033002	muscle cell proliferation	9/55	239/18670	3.02525e-08	1.0557e-06	4.26386e-07	TNF/EDN1/JUN/MMP2/HMOX1/MMP9/MAPK1/PTGS2/STAT3	9
GO:0034614	cellular response to reactive oxygen species	8/55	168/18670	3.09034e-08	1.0557e-06	4.26386e-07	SOD1/TNF/JUN/MMP2/MMP9/MAPK1/NOS3/RELA	8
GO:0050806	positive regulation of synaptic transmission	8/55	168/18670	3.09034e-08	1.0557e-06	4.26386e-07	TNF/APP/CCL2/DRD2/CNR1/MAPK1/PTGS2/SNCA	8
GO:0032768	regulation of monooxygenase activity	6/55	64/18670	3.24508e-08	1.09677e-06	4.42973e-07	TNF/CNR1/NOS3/CNR2/SNCA/HIF1A	6
GO:0043062	extracellular structure organization	11/55	422/18670	3.38101e-08	1.13068e-06	4.56671e-07	TNF/COL1A1/TTR/MMP1/APP/SERPINE1/ICAM1/MMP2/MMP9/DPP4/MMP12	11
GO:0010634	positive regulation of epithelial cell migration	8/55	171/18670	3.54716e-08	1.17389e-06	4.74121e-07	EDN1/JUN/HMOX1/MMP9/VEGFA/NOS3/PTGS2/HIF1A	8
GO:0052548	regulation of endopeptidase activity	11/55	425/18670	3.63443e-08	1.18817e-06	4.79889e-07	TNF/APP/SERPINE1/NGFR/MMP9/VEGFA/PTGS2/SNCA/STAT3/VCP/CASP9	11
GO:0043279	response to alkaloid	7/55	112/18670	3.70251e-08	1.18817e-06	4.79889e-07	ICAM1/DRD2/CNR1/SNCA/CASP3/RELA/BCL2L1	7
GO:1990748	cellular detoxification	7/55	112/18670	3.70251e-08	1.18817e-06	4.79889e-07	SOD1/TNF/GSTM1/PTGS1/NOS3/PTGS2/HBA2	7
GO:0097237	cellular response to toxic substance	9/55	247/18670	4.01662e-08	1.27608e-06	5.15395e-07	SOD1/TNF/GSTM1/HMOX1/PTGS1/NOS3/PTGS2/HBA2/RELA	9
GO:0010039	response to iron ion	5/55	33/18670	4.10498e-08	1.29124e-06	5.21519e-07	HMOX1/BCL2/DRD2/SNCA/HIF1A	5
GO:0002688	regulation of leukocyte chemotaxis	7/55	114/18670	4.1863e-08	1.2932e-06	5.22311e-07	SERPINE1/EDN1/F7/CCL3/CCL2/EDN3/VEGFA	7
GO:0048608	reproductive structure development	11/55	431/18670	4.19262e-08	1.2932e-06	5.22311e-07	SOD1/ESR1/ICAM1/BCL2/VEGFA/MAPK1/NOS3/PTGS2/CASP3/BCL2L1/HIF1A	11
GO:0001936	regulation of endothelial cell proliferation	8/55	176/18670	4.43825e-08	1.31143e-06	5.29672e-07	TNF/JUN/NGFR/HMOX1/CCL2/VEGFA/STAT3/HIF1A	8
GO:0032963	collagen metabolic process	7/55	115/18670	4.44759e-08	1.31143e-06	5.29672e-07	F2/COL1A1/MMP1/MMP2/MMP9/MMP12/HIF1A	7
GO:0042391	regulation of membrane potential	11/55	434/18670	4.49939e-08	1.31143e-06	5.29672e-07	SOD1/APP/EDN1/JUN/BCL2/DRD2/CNR1/CNR2/SNCA/VCP/BCL2L1	11
GO:0048732	gland development	11/55	434/18670	4.49939e-08	1.31143e-06	5.29672e-07	SOD1/TNF/ESR1/JUN/HMOX1/BCL2/DRD2/VEGFA/MAPK1/RELA/HIF1A	11
GO:0050673	epithelial cell proliferation	11/55	434/18670	4.49939e-08	1.31143e-06	5.29672e-07	TNF/ESR1/JUN/NGFR/HMOX1/CCL2/VEGFA/MAPK1/MMP12/STAT3/HIF1A	11
GO:0061458	reproductive system development	11/55	434/18670	4.49939e-08	1.31143e-06	5.29672e-07	SOD1/ESR1/ICAM1/BCL2/VEGFA/MAPK1/NOS3/PTGS2/CASP3/BCL2L1/HIF1A	11
GO:0050804	modulation of chemical synaptic transmission	11/55	436/18670	4.71485e-08	1.36173e-06	5.49991e-07	TNF/APP/EDN1/CCL2/DRD2/CNR1/MAPK1/CNR2/PTGS2/SNCA/STAT3	11
GO:0099177	regulation of trans-synaptic signaling	11/55	437/18670	4.82599e-08	1.38128e-06	5.57884e-07	TNF/APP/EDN1/CCL2/DRD2/CNR1/MAPK1/CNR2/PTGS2/SNCA/STAT3	11
GO:1900371	regulation of purine nucleotide biosynthetic process	7/55	117/18670	5.01176e-08	1.42164e-06	5.74186e-07	TP53/APP/NOS3/SNCA/STAT3/VCP/HIF1A	7
GO:0071347	cellular response to interleukin-1	8/55	179/18670	5.06054e-08	1.42277e-06	5.74643e-07	EDN1/ICAM1/CCL3/CCL2/NFKBIA/RELA/HIF1A/ABCC2	8
GO:0051924	regulation of calcium ion transport	9/55	254/18670	5.10603e-08	1.42297e-06	5.74723e-07	F2/ICAM1/CCL3/BCL2/CCL2/DRD2/NOS3/PTGS2/SNCA	9
GO:0030808	regulation of nucleotide biosynthetic process	7/55	118/18670	5.31581e-08	1.46855e-06	5.93133e-07	TP53/APP/NOS3/SNCA/STAT3/VCP/HIF1A	7
GO:0034504	protein localization to nucleus	9/55	262/18670	6.65961e-08	1.82393e-06	7.36666e-07	F2/COL1A1/TP53/NGFR/NFKBIA/MAPK1/PTGS2/MMP12/STAT3	9
GO:0052547	regulation of peptidase activity	11/55	452/18670	6.7976e-08	1.84581e-06	7.45504e-07	TNF/APP/SERPINE1/NGFR/MMP9/VEGFA/PTGS2/SNCA/STAT3/VCP/CASP9	11
GO:0071276	cellular response to cadmium ion	5/55	37/18670	7.47225e-08	2.01181e-06	8.12548e-07	SOD1/JUN/HMOX1/MMP9/MAPK1	5
GO:0062012	regulation of small molecule metabolic process	11/55	459/18670	7.94172e-08	2.12024e-06	8.56343e-07	SOD1/TNF/TP53/APP/CNR1/NOS3/PTGS2/SNCA/STAT3/VCP/HIF1A	11
GO:0031668	cellular response to extracellular stimulus	9/55	268/18670	8.08148e-08	2.13957e-06	8.64151e-07	SOD1/COL1A1/TP53/ICAM1/JUN/HMOX1/BCL2/MAPK1/PTGS2	9
GO:0001935	endothelial cell proliferation	8/55	191/18670	8.36194e-08	2.19553e-06	8.86752e-07	TNF/JUN/NGFR/HMOX1/CCL2/VEGFA/STAT3/HIF1A	8
GO:0043620	regulation of DNA-templated transcription in response to stress	7/55	127/18670	8.82844e-08	2.29901e-06	9.28547e-07	TP53/JUN/HMOX1/VEGFA/MUC1/RELA/HIF1A	7
GO:0034349	glial cell apoptotic process	4/55	15/18670	8.98007e-08	2.31949e-06	9.36817e-07	TP53/CCL2/CASP3/CASP9	4
GO:1901654	response to ketone	8/55	193/18670	9.06197e-08	2.32177e-06	9.37737e-07	EDN1/ICAM1/NEFL/F7/CASP9/RELA/BCL2L1/ABCC2	8
GO:0042310	vasoconstriction	6/55	76/18670	9.21001e-08	2.34082e-06	9.45432e-07	EDN1/ICAM1/EDN3/EDNRA/PTGS2/ECE1	6
GO:1902042	negative regulation of extrinsic apoptotic signaling pathway via death domain receptors	5/55	39/18670	9.82577e-08	2.4775e-06	1.00064e-06	SERPINE1/ICAM1/HMOX1/NOS3/BCL2L1	5
GO:0030193	regulation of blood coagulation	6/55	79/18670	1.16312e-07	2.90963e-06	1.17517e-06	F2/PLAU/SERPINE1/EDN1/F7/NOS3	6
GO:1900046	regulation of hemostasis	6/55	80/18670	1.2546e-07	3.11395e-06	1.25769e-06	F2/PLAU/SERPINE1/EDN1/F7/NOS3	6
GO:0032355	response to estradiol	7/55	134/18670	1.27648e-07	3.1437e-06	1.26971e-06	COL1A1/ESR1/F7/PTGS2/STAT3/CASP3/CASP9	7
GO:0072511	divalent inorganic cation transport	11/55	489/18670	1.50309e-07	3.67332e-06	1.48361e-06	F2/ICAM1/CCL3/BCL2/CCL2/DRD2/NOS3/PTGS2/SNCA/ATP2C1/ABCC2	11
GO:0071456	cellular response to hypoxia	8/55	207/18670	1.55318e-07	3.76676e-06	1.52136e-06	TP53/EDN1/ICAM1/HMOX1/BCL2/VEGFA/PTGS2/HIF1A	8
GO:0042063	gliogenesis	9/55	290/18670	1.5813e-07	3.8059e-06	1.53716e-06	SOD1/F2/TNF/APP/CCL3/CCL2/MAPK1/STAT3/RELA	9
GO:0050818	regulation of coagulation	6/55	84/18670	1.68185e-07	3.98748e-06	1.6105e-06	F2/PLAU/SERPINE1/EDN1/F7/NOS3	6
GO:0097756	negative regulation of blood vessel diameter	6/55	84/18670	1.68185e-07	3.98748e-06	1.6105e-06	EDN1/ICAM1/EDN3/EDNRA/PTGS2/ECE1	6
GO:0014031	mesenchymal cell development	6/55	85/18670	1.80551e-07	4.18694e-06	1.69106e-06	EDN1/BCL2/EDN3/EDNRA/MAPK1/HIF1A	6
GO:1904705	regulation of vascular smooth muscle cell proliferation	6/55	85/18670	1.80551e-07	4.18694e-06	1.69106e-06	TNF/EDN1/JUN/MMP2/HMOX1/MMP9	6
GO:1990874	vascular smooth muscle cell proliferation	6/55	85/18670	1.80551e-07	4.18694e-06	1.69106e-06	TNF/EDN1/JUN/MMP2/HMOX1/MMP9	6
GO:0048511	rhythmic process	9/55	295/18670	1.8277e-07	4.20768e-06	1.69944e-06	ESR1/TP53/SERPINE1/JUN/NGFR/F7/DRD2/NOS3/CASP3	9
GO:0050890	cognition	9/55	296/18670	1.8808e-07	4.29879e-06	1.73624e-06	TNF/APP/JUN/DRD2/CNR1/MAPK1/PTGS2/CASP3/HIF1A	9
GO:1900542	regulation of purine nucleotide metabolic process	7/55	142/18670	1.89854e-07	4.30833e-06	1.74009e-06	TP53/APP/NOS3/SNCA/STAT3/VCP/HIF1A	7
GO:0010959	regulation of metal ion transport	10/55	394/18670	1.9613e-07	4.41919e-06	1.78486e-06	F2/ICAM1/CCL3/BCL2/CCL2/EDN3/DRD2/NOS3/PTGS2/SNCA	10
GO:0035994	response to muscle stretch	4/55	18/18670	1.99995e-07	4.47453e-06	1.80722e-06	EDN1/JUN/NFKBIA/RELA	4
GO:0002690	positive regulation of leukocyte chemotaxis	6/55	87/18670	2.07533e-07	4.58189e-06	1.85058e-06	SERPINE1/EDN1/F7/CCL3/EDN3/VEGFA	6
GO:0043281	regulation of cysteine-type endopeptidase activity involved in apoptotic process	8/55	215/18670	2.07678e-07	4.58189e-06	1.85058e-06	TNF/NGFR/MMP9/VEGFA/PTGS2/SNCA/VCP/CASP9	8
GO:0008406	gonad development	8/55	217/18670	2.22915e-07	4.85069e-06	1.95915e-06	SOD1/ESR1/ICAM1/BCL2/VEGFA/NOS3/CASP3/BCL2L1	8
GO:0036294	cellular response to decreased oxygen levels	8/55	217/18670	2.22915e-07	4.85069e-06	1.95915e-06	TP53/EDN1/ICAM1/HMOX1/BCL2/VEGFA/PTGS2/HIF1A	8
GO:0006140	regulation of nucleotide metabolic process	7/55	146/18670	2.29491e-07	4.91053e-06	1.98331e-06	TP53/APP/NOS3/SNCA/STAT3/VCP/HIF1A	7
GO:0030810	positive regulation of nucleotide biosynthetic process	5/55	46/18670	2.30302e-07	4.91053e-06	1.98331e-06	APP/NOS3/STAT3/VCP/HIF1A	5
GO:1900373	positive regulation of purine nucleotide biosynthetic process	5/55	46/18670	2.30302e-07	4.91053e-06	1.98331e-06	APP/NOS3/STAT3/VCP/HIF1A	5
GO:0006953	acute-phase response	5/55	47/18670	2.57144e-07	5.44631e-06	2.19971e-06	F2/TNF/CNR1/PTGS2/STAT3	5
GO:0045137	development of primary sexual characteristics	8/55	223/18670	2.74524e-07	5.77591e-06	2.33283e-06	SOD1/ESR1/ICAM1/BCL2/VEGFA/NOS3/CASP3/BCL2L1	8
GO:0030595	leukocyte chemotaxis	8/55	224/18670	2.84052e-07	5.90848e-06	2.38637e-06	SERPINE1/EDN1/F7/CCL3/CCL2/EDN3/VEGFA/CNR2	8
GO:0001774	microglial cell activation	5/55	48/18670	2.86404e-07	5.90848e-06	2.38637e-06	TNF/APP/JUN/CCL3/SNCA	5
GO:0002269	leukocyte activation involved in inflammatory response	5/55	48/18670	2.86404e-07	5.90848e-06	2.38637e-06	TNF/APP/JUN/CCL3/SNCA	5
GO:0009416	response to light stimulus	9/55	314/18670	3.09514e-07	6.34404e-06	2.56229e-06	TP53/APP/BCL2/DRD2/PTGS2/CASP3/CASP9/RELA/HIF1A	9
GO:0045807	positive regulation of endocytosis	7/55	153/18670	3.15661e-07	6.38761e-06	2.57989e-06	SOD1/TNF/SERPINE1/CCL2/DRD2/VEGFA/SNCA	7
GO:0050729	positive regulation of inflammatory response	7/55	153/18670	3.15661e-07	6.38761e-06	2.57989e-06	TNF/SERPINE1/CCL3/CNR1/NFKBIA/PTGS2/SNCA	7
GO:1904707	positive regulation of vascular smooth muscle cell proliferation	5/55	49/18670	3.18239e-07	6.39901e-06	2.5845e-06	TNF/EDN1/JUN/MMP2/MMP9	5
GO:0007204	positive regulation of cytosolic calcium ion concentration	9/55	319/18670	3.5348e-07	7.06293e-06	2.85265e-06	F2/ESR1/EDN1/CCL3/BCL2/DRD2/CNR1/EDNRA/SNCA	9
GO:0009914	hormone transport	9/55	322/18670	3.82385e-07	7.59272e-06	3.06662e-06	TNF/TTR/EDN1/EDN3/DRD2/CNR1/DPP4/HIF1A/ABCC2	9
GO:0050999	regulation of nitric-oxide synthase activity	5/55	51/18670	3.90286e-07	7.70148e-06	3.11055e-06	TNF/CNR1/NOS3/CNR2/HIF1A	5
GO:0071453	cellular response to oxygen levels	8/55	234/18670	3.9604e-07	7.76678e-06	3.13692e-06	TP53/EDN1/ICAM1/HMOX1/BCL2/VEGFA/PTGS2/HIF1A	8
GO:2001243	negative regulation of intrinsic apoptotic signaling pathway	6/55	98/18670	4.22008e-07	8.22527e-06	3.3221e-06	BCL2/MMP9/MUC1/PTGS2/BCL2L1/HIF1A	6
GO:2000116	regulation of cysteine-type endopeptidase activity	8/55	239/18670	4.64963e-07	9.00724e-06	3.63793e-06	TNF/NGFR/MMP9/VEGFA/PTGS2/SNCA/VCP/CASP9	8
GO:1901522	positive regulation of transcription from RNA polymerase II promoter involved in cellular response to chemical stimulus	4/55	22/18670	4.73929e-07	9.0749e-06	3.66526e-06	TP53/VEGFA/RELA/HIF1A	4
GO:0030195	negative regulation of blood coagulation	5/55	53/18670	4.74661e-07	9.0749e-06	3.66526e-06	F2/PLAU/SERPINE1/EDN1/NOS3	5
GO:0006816	calcium ion transport	10/55	434/18670	4.77025e-07	9.0749e-06	3.66526e-06	F2/ICAM1/CCL3/BCL2/CCL2/DRD2/NOS3/PTGS2/SNCA/ATP2C1	10
GO:1903426	regulation of reactive oxygen species biosynthetic process	6/55	101/18670	5.0467e-07	9.54368e-06	3.85459e-06	TNF/EDN1/ICAM1/PTGS2/SNCA/STAT3	6
GO:1900047	negative regulation of hemostasis	5/55	54/18670	5.21929e-07	9.81166e-06	3.96283e-06	F2/PLAU/SERPINE1/EDN1/NOS3	5
GO:0009266	response to temperature stimulus	8/55	243/18670	5.27267e-07	9.85369e-06	3.9798e-06	SOD1/HMOX1/NFKBIA/MAPK1/NOS3/PTGS2/VCP/ABCC2	8
GO:0098869	cellular oxidant detoxification	6/55	102/18670	5.35006e-07	9.93985e-06	4.0146e-06	SOD1/TNF/PTGS1/NOS3/PTGS2/HBA2	6
GO:0007596	blood coagulation	9/55	336/18670	5.46134e-07	1.00876e-05	4.07428e-06	F2/F10/PLAU/COL1A1/SERPINE1/EDN1/F7/MAPK1/NOS3	9
GO:0048872	homeostasis of number of cells	8/55	246/18670	5.78564e-07	1.06248e-05	4.29127e-06	SOD1/HMOX1/BCL2/VEGFA/NOS3/STAT3/CASP3/HIF1A	8
GO:0071496	cellular response to external stimulus	9/55	339/18670	5.88226e-07	1.07402e-05	4.33786e-06	SOD1/COL1A1/TP53/ICAM1/JUN/HMOX1/BCL2/MAPK1/PTGS2	9
GO:0007599	hemostasis	9/55	341/18670	6.17827e-07	1.11741e-05	4.5131e-06	F2/F10/PLAU/COL1A1/SERPINE1/EDN1/F7/MAPK1/NOS3	9
GO:0048660	regulation of smooth muscle cell proliferation	7/55	169/18670	6.19025e-07	1.11741e-05	4.5131e-06	TNF/EDN1/JUN/MMP2/HMOX1/MMP9/PTGS2	7
GO:0050817	coagulation	9/55	342/18670	6.33105e-07	1.13357e-05	4.57837e-06	F2/F10/PLAU/COL1A1/SERPINE1/EDN1/F7/MAPK1/NOS3	9
GO:0033138	positive regulation of peptidyl-serine phosphorylation	6/55	105/18670	6.35112e-07	1.13357e-05	4.57837e-06	TNF/APP/BCL2/VEGFA/PTGS2/SNCA	6
GO:0048659	smooth muscle cell proliferation	7/55	171/18670	6.70133e-07	1.18939e-05	4.80384e-06	TNF/EDN1/JUN/MMP2/HMOX1/MMP9/PTGS2	7
GO:0045981	positive regulation of nucleotide metabolic process	5/55	57/18670	6.86412e-07	1.1982e-05	4.83942e-06	APP/NOS3/STAT3/VCP/HIF1A	5
GO:0050819	negative regulation of coagulation	5/55	57/18670	6.86412e-07	1.1982e-05	4.83942e-06	F2/PLAU/SERPINE1/EDN1/NOS3	5
GO:1900544	positive regulation of purine nucleotide metabolic process	5/55	57/18670	6.86412e-07	1.1982e-05	4.83942e-06	APP/NOS3/STAT3/VCP/HIF1A	5
GO:0019229	regulation of vasoconstriction	5/55	58/18670	7.49493e-07	1.2871e-05	5.19847e-06	EDN1/ICAM1/EDN3/PTGS2/ECE1	5
GO:0061900	glial cell activation	5/55	58/18670	7.49493e-07	1.2871e-05	5.19847e-06	TNF/APP/JUN/CCL3/SNCA	5
GO:1902041	regulation of extrinsic apoptotic signaling pathway via death domain receptors	5/55	58/18670	7.49493e-07	1.2871e-05	5.19847e-06	SERPINE1/ICAM1/HMOX1/NOS3/BCL2L1	5
GO:0007611	learning or memory	8/55	256/18670	7.81598e-07	1.33502e-05	5.39201e-06	APP/JUN/DRD2/CNR1/MAPK1/PTGS2/CASP3/HIF1A	8
GO:0010631	epithelial cell migration	9/55	351/18670	7.86038e-07	1.33542e-05	5.39364e-06	EDN1/JUN/HMOX1/MMP9/VEGFA/DPP4/NOS3/PTGS2/HIF1A	9
GO:0048863	stem cell differentiation	8/55	257/18670	8.04895e-07	1.36019e-05	5.49366e-06	ESR1/TP53/EDN1/EDN3/EDNRA/MAPK1/STAT3/HIF1A	8
GO:0009408	response to heat	7/55	176/18670	8.13637e-07	1.36622e-05	5.51801e-06	SOD1/HMOX1/MAPK1/NOS3/PTGS2/VCP/ABCC2	7
GO:0001836	release of cytochrome c from mitochondria	5/55	59/18670	8.17064e-07	1.36622e-05	5.51801e-06	TP53/JUN/BCL2/MMP9/BCL2L1	5
GO:0001667	ameboidal-type cell migration	10/55	461/18670	8.26537e-07	1.37482e-05	5.55276e-06	EDN1/JUN/HMOX1/EDN3/MMP9/VEGFA/DPP4/NOS3/PTGS2/HIF1A	10
GO:0006939	smooth muscle contraction	6/55	110/18670	8.35795e-07	1.38298e-05	5.58571e-06	SOD1/EDN1/EDN3/DRD2/EDNRA/PTGS2	6
GO:0090132	epithelium migration	9/55	354/18670	8.43673e-07	1.38878e-05	5.60915e-06	EDN1/JUN/HMOX1/MMP9/VEGFA/DPP4/NOS3/PTGS2/HIF1A	9
GO:0002683	negative regulation of immune system process	10/55	463/18670	8.59641e-07	1.40777e-05	5.68585e-06	TNF/HMOX1/CCL3/CCL2/DRD2/CNR1/NFKBIA/CNR2/MMP12/CASP3	10
GO:1904019	epithelial cell apoptotic process	6/55	111/18670	8.81567e-07	1.43628e-05	5.80097e-06	TNF/SERPINE1/ICAM1/HMOX1/CCL2/BCL2L1	6
GO:0051091	positive regulation of DNA-binding transcription factor activity	8/55	261/18670	9.04121e-07	1.45938e-05	5.89429e-06	TNF/ESR1/APP/EDN1/ICAM1/VEGFA/STAT3/RELA	8
GO:0051480	regulation of cytosolic calcium ion concentration	9/55	357/18670	9.04936e-07	1.45938e-05	5.89429e-06	F2/ESR1/EDN1/CCL3/BCL2/DRD2/CNR1/EDNRA/SNCA	9
GO:0051346	negative regulation of hydrolase activity	10/55	466/18670	9.11474e-07	1.4625e-05	5.90689e-06	TNF/TP53/APP/SERPINE1/NGFR/MMP9/VEGFA/NOS3/PTGS2/SNCA	10
GO:0090130	tissue migration	9/55	360/18670	9.70015e-07	1.54861e-05	6.25469e-06	EDN1/JUN/HMOX1/MMP9/VEGFA/DPP4/NOS3/PTGS2/HIF1A	9
GO:0045861	negative regulation of proteolysis	9/55	363/18670	1.03911e-06	1.65063e-05	6.66671e-06	F2/TP53/APP/SERPINE1/NGFR/MMP9/VEGFA/PTGS2/SNCA	9
GO:0050769	positive regulation of neurogenesis	10/55	474/18670	1.0633e-06	1.68066e-05	6.788e-06	TNF/NEFL/NGFR/CCL3/BCL2/DRD2/VEGFA/CNR1/RELA/HIF1A	10
GO:0032102	negative regulation of response to external stimulus	9/55	365/18670	1.08751e-06	1.7104e-05	6.90813e-06	SOD1/F2/PLAU/SERPINE1/EDN1/CCL2/DRD2/NOS3/CNR2	9
GO:0022898	regulation of transmembrane transporter activity	8/55	268/18670	1.103e-06	1.71776e-05	6.93787e-06	APP/NEFL/ABCB1/BCL2/CCL2/DRD2/MMP9/SNCA	8
GO:0031334	positive regulation of protein complex assembly	8/55	268/18670	1.103e-06	1.71776e-05	6.93787e-06	TNF/ESR1/MMP1/TP53/ICAM1/JUN/VEGFA/VCP	8
GO:0046686	response to cadmium ion	5/55	63/18670	1.13694e-06	1.76198e-05	7.11646e-06	SOD1/JUN/HMOX1/MMP9/MAPK1	5
GO:0007548	sex differentiation	8/55	270/18670	1.16626e-06	1.79864e-05	7.26452e-06	SOD1/ESR1/ICAM1/BCL2/VEGFA/NOS3/CASP3/BCL2L1	8
GO:0070838	divalent metal ion transport	10/55	483/18670	1.26017e-06	1.93408e-05	7.81156e-06	F2/ICAM1/CCL3/BCL2/CCL2/DRD2/NOS3/PTGS2/SNCA/ATP2C1	10
GO:0043270	positive regulation of ion transport	8/55	275/18670	1.3381e-06	2.04382e-05	8.2548e-06	F2/EDN1/ABCB1/CCL3/CCL2/EDN3/DRD2/SNCA	8
GO:0040014	regulation of multicellular organism growth	5/55	66/18670	1.43593e-06	2.172e-05	8.7725e-06	SOD1/APP/BCL2/DRD2/STAT3	5
GO:0051926	negative regulation of calcium ion transport	5/55	66/18670	1.43593e-06	2.172e-05	8.7725e-06	ICAM1/BCL2/DRD2/NOS3/PTGS2	5
GO:0060485	mesenchyme development	8/55	278/18670	1.45124e-06	2.172e-05	8.7725e-06	COL1A1/EDN1/BCL2/EDN3/EDNRA/MAPK1/NOS3/HIF1A	8
GO:0050678	regulation of epithelial cell proliferation	9/55	378/18670	1.45234e-06	2.172e-05	8.7725e-06	TNF/JUN/NGFR/HMOX1/CCL2/VEGFA/MMP12/STAT3/HIF1A	9
GO:0043112	receptor metabolic process	7/55	192/18670	1.45777e-06	2.172e-05	8.7725e-06	TNF/EDN1/DRD2/VEGFA/SNCA/ECE1/HIF1A	7
GO:0043618	regulation of transcription from RNA polymerase II promoter in response to stress	6/55	121/18670	1.46304e-06	2.172e-05	8.7725e-06	TP53/JUN/HMOX1/VEGFA/MUC1/HIF1A	6
GO:1903578	regulation of ATP metabolic process	6/55	122/18670	1.53525e-06	2.26861e-05	9.16267e-06	TP53/APP/SNCA/STAT3/VCP/HIF1A	6
GO:0042108	positive regulation of cytokine biosynthetic process	5/55	67/18670	1.54827e-06	2.27725e-05	9.19758e-06	TNF/APP/HMOX1/STAT3/RELA	5
GO:0032409	regulation of transporter activity	8/55	283/18670	1.65793e-06	2.42671e-05	9.80123e-06	APP/NEFL/ABCB1/BCL2/CCL2/DRD2/MMP9/SNCA	8
GO:0033627	cell adhesion mediated by integrin	5/55	68/18670	1.66742e-06	2.42671e-05	9.80123e-06	PLAU/SERPINE1/ICAM1/MUC1/DPP4	5
GO:0001763	morphogenesis of a branching structure	7/55	196/18670	1.6728e-06	2.42671e-05	9.80123e-06	TNF/ESR1/EDN1/BCL2/DRD2/VEGFA/EDNRA	7
GO:0009165	nucleotide biosynthetic process	9/55	386/18670	1.72588e-06	2.48772e-05	1.00477e-05	TP53/APP/MAPK1/NOS3/PTGS2/SNCA/STAT3/VCP/HIF1A	9
GO:0010952	positive regulation of peptidase activity	7/55	197/18670	1.73052e-06	2.48772e-05	1.00477e-05	TNF/APP/NGFR/SNCA/STAT3/VCP/CASP9	7
GO:1901293	nucleoside phosphate biosynthetic process	9/55	390/18670	1.8786e-06	2.68842e-05	1.08583e-05	TP53/APP/MAPK1/NOS3/PTGS2/SNCA/STAT3/VCP/HIF1A	9
GO:0051966	regulation of synaptic transmission, glutamatergic	5/55	70/18670	1.92735e-06	2.74583e-05	1.10901e-05	TNF/CCL2/DRD2/CNR1/PTGS2	5
GO:0010595	positive regulation of endothelial cell migration	6/55	128/18670	2.03232e-06	2.88158e-05	1.16384e-05	EDN1/HMOX1/VEGFA/NOS3/PTGS2/HIF1A	6
GO:0010632	regulation of epithelial cell migration	8/55	291/18670	2.04078e-06	2.88158e-05	1.16384e-05	EDN1/JUN/HMOX1/MMP9/VEGFA/NOS3/PTGS2/HIF1A	8
GO:0045766	positive regulation of angiogenesis	7/55	204/18670	2.18316e-06	3.06898e-05	1.23953e-05	SERPINE1/HMOX1/VEGFA/NOS3/PTGS2/STAT3/HIF1A	7
GO:0038034	signal transduction in absence of ligand	5/55	72/18670	2.21817e-06	3.09084e-05	1.24836e-05	TNF/BCL2/CASP3/CASP9/BCL2L1	5
GO:0097192	extrinsic apoptotic signaling pathway in absence of ligand	5/55	72/18670	2.21817e-06	3.09084e-05	1.24836e-05	TNF/BCL2/CASP3/CASP9/BCL2L1	5
GO:1903532	positive regulation of secretion by cell	9/55	399/18670	2.26549e-06	3.13495e-05	1.26618e-05	TNF/EDN1/CCL3/EDN3/DRD2/CNR1/SNCA/MMP12/HIF1A	9
GO:0001975	response to amphetamine	4/55	32/18670	2.27943e-06	3.13495e-05	1.26618e-05	SOD1/ICAM1/DRD2/CNR2	4
GO:0046685	response to arsenic-containing substance	4/55	32/18670	2.27943e-06	3.13495e-05	1.26618e-05	NEFL/HMOX1/VCP/ABCC2	4
GO:0043627	response to estrogen	5/55	73/18670	2.37596e-06	3.25363e-05	1.31411e-05	ESR1/F7/HMOX1/MAPK1/ABCC2	5
GO:0036003	positive regulation of transcription from RNA polymerase II promoter in response to stress	4/55	33/18670	2.58817e-06	3.51394e-05	1.41924e-05	TP53/VEGFA/MUC1/HIF1A	4
GO:1902692	regulation of neuroblast proliferation	4/55	33/18670	2.58817e-06	3.51394e-05	1.41924e-05	TP53/DRD2/VEGFA/HIF1A	4
GO:0009612	response to mechanical stimulus	7/55	210/18670	2.64626e-06	3.57224e-05	1.44279e-05	COL1A1/EDN1/JUN/DRD2/NFKBIA/PTGS2/RELA	7
GO:0046683	response to organophosphorus	6/55	134/18670	2.6536e-06	3.57224e-05	1.44279e-05	SOD1/COL1A1/APP/JUN/PTGS2/RELA	6
GO:0050921	positive regulation of chemotaxis	6/55	135/18670	2.77078e-06	3.69864e-05	1.49384e-05	SERPINE1/EDN1/F7/CCL3/EDN3/VEGFA	6
GO:0060359	response to ammonium ion	6/55	135/18670	2.77078e-06	3.69864e-05	1.49384e-05	DRD2/CNR1/MAPK1/SNCA/CASP3/RELA	6
GO:0060326	cell chemotaxis	8/55	304/18670	2.82318e-06	3.75282e-05	1.51572e-05	SERPINE1/EDN1/F7/CCL3/CCL2/EDN3/VEGFA/CNR2	8
GO:0001660	fever generation	3/55	10/18670	2.86084e-06	3.78704e-05	1.52955e-05	TNF/CNR1/PTGS2	3
GO:0061045	negative regulation of wound healing	5/55	76/18670	2.9029e-06	3.82677e-05	1.54559e-05	F2/PLAU/SERPINE1/EDN1/NOS3	5
GO:0070374	positive regulation of ERK1 and ERK2 cascade	7/55	215/18670	3.0924e-06	4.03292e-05	1.62886e-05	TNF/APP/ICAM1/JUN/CCL3/CCL2/DRD2	7
GO:0006809	nitric oxide biosynthetic process	5/55	77/18670	3.09757e-06	4.03292e-05	1.62886e-05	TNF/EDN1/ICAM1/NOS3/PTGS2	5
GO:0048678	response to axon injury	5/55	77/18670	3.09757e-06	4.03292e-05	1.62886e-05	SOD1/JUN/NEFL/BCL2/DRD2	5
GO:0009895	negative regulation of catabolic process	8/55	308/18670	3.11006e-06	4.03292e-05	1.62886e-05	TNF/TP53/HMOX1/BCL2/CNR1/SNCA/STAT3/RELA	8
GO:0033135	regulation of peptidyl-serine phosphorylation	6/55	139/18670	3.28248e-06	4.22866e-05	1.70791e-05	TNF/APP/BCL2/VEGFA/PTGS2/SNCA	6
GO:0050920	regulation of chemotaxis	7/55	217/18670	3.28762e-06	4.22866e-05	1.70791e-05	SERPINE1/EDN1/F7/CCL3/CCL2/EDN3/VEGFA	7
GO:0072347	response to anesthetic	5/55	78/18670	3.30236e-06	4.23048e-05	1.70865e-05	F7/DRD2/CNR1/SNCA/RELA	5
GO:0010001	glial cell differentiation	7/55	218/18670	3.38903e-06	4.32408e-05	1.74645e-05	SOD1/F2/TNF/APP/MAPK1/STAT3/RELA	7
GO:0007584	response to nutrient	7/55	219/18670	3.49304e-06	4.42127e-05	1.78571e-05	SOD1/COL1A1/F7/HMOX1/CNR1/PTGS2/RELA	7
GO:0048762	mesenchymal cell differentiation	7/55	219/18670	3.49304e-06	4.42127e-05	1.78571e-05	COL1A1/EDN1/BCL2/EDN3/EDNRA/MAPK1/HIF1A	7
GO:0043536	positive regulation of blood vessel endothelial cell migration	5/55	79/18670	3.51763e-06	4.43472e-05	1.79114e-05	HMOX1/VEGFA/NOS3/PTGS2/HIF1A	5
GO:0009411	response to UV	6/55	141/18670	3.56578e-06	4.47766e-05	1.80848e-05	TP53/BCL2/PTGS2/CASP3/CASP9/RELA	6
GO:2001171	positive regulation of ATP biosynthetic process	4/55	36/18670	3.70137e-06	4.62962e-05	1.86986e-05	APP/STAT3/VCP/HIF1A	4
GO:0022617	extracellular matrix disassembly	5/55	80/18670	3.74377e-06	4.6643e-05	1.88386e-05	MMP1/MMP2/MMP9/DPP4/MMP12	5
GO:0070371	ERK1 and ERK2 cascade	8/55	317/18670	3.84741e-06	4.77469e-05	1.92845e-05	TNF/APP/ICAM1/JUN/CCL3/CCL2/DRD2/MAPK1	8
GO:0006606	protein import into nucleus	6/55	143/18670	3.86868e-06	4.78241e-05	1.93157e-05	TP53/NFKBIA/MAPK1/PTGS2/MMP12/STAT3	6
GO:0031652	positive regulation of heat generation	3/55	11/18670	3.92545e-06	4.83378e-05	1.95231e-05	TNF/CNR1/PTGS2	3
GO:0014032	neural crest cell development	5/55	81/18670	3.98118e-06	4.8647e-05	1.9648e-05	EDN1/EDN3/EDNRA/MAPK1/HIF1A	5
GO:0048708	astrocyte differentiation	5/55	81/18670	3.98118e-06	4.8647e-05	1.9648e-05	F2/TNF/APP/MAPK1/STAT3	5
GO:0051047	positive regulation of secretion	9/55	428/18670	4.01648e-06	4.88902e-05	1.97463e-05	TNF/EDN1/CCL3/EDN3/DRD2/CNR1/SNCA/MMP12/HIF1A	9
GO:0046209	nitric oxide metabolic process	5/55	82/18670	4.23025e-06	5.12958e-05	2.07178e-05	TNF/EDN1/ICAM1/NOS3/PTGS2	5
GO:0060562	epithelial tube morphogenesis	8/55	322/18670	4.3177e-06	5.21572e-05	2.10657e-05	TNF/ESR1/EDN1/BCL2/VEGFA/EDNRA/CASP3/HIF1A	8
GO:0035264	multicellular organism growth	6/55	146/18670	4.36204e-06	5.24932e-05	2.12015e-05	SOD1/TP53/APP/BCL2/DRD2/STAT3	6
GO:0006970	response to osmotic stress	5/55	83/18670	4.49138e-06	5.38458e-05	2.17478e-05	TNF/TP53/ABCB1/PTGS2/CASP3	5
GO:0002262	myeloid cell homeostasis	6/55	147/18670	4.53743e-06	5.41933e-05	2.18881e-05	SOD1/HMOX1/VEGFA/STAT3/CASP3/HIF1A	6
GO:0043434	response to peptide hormone	9/55	436/18670	4.66781e-06	5.55417e-05	2.24327e-05	COL1A1/EDN1/ICAM1/NEFL/F7/PTGS2/STAT3/RELA/ABCC2	9
GO:0061041	regulation of wound healing	6/55	148/18670	4.71852e-06	5.59355e-05	2.25918e-05	F2/PLAU/SERPINE1/EDN1/F7/NOS3	6
GO:0010507	negative regulation of autophagy	5/55	84/18670	4.765e-06	5.60682e-05	2.26454e-05	TP53/HMOX1/BCL2/SNCA/STAT3	5
GO:0043154	negative regulation of cysteine-type endopeptidase activity involved in apoptotic process	5/55	84/18670	4.765e-06	5.60682e-05	2.26454e-05	NGFR/MMP9/VEGFA/PTGS2/SNCA	5
GO:1904018	positive regulation of vasculature development	7/55	230/18670	4.82431e-06	5.65565e-05	2.28426e-05	SERPINE1/HMOX1/VEGFA/NOS3/PTGS2/STAT3/HIF1A	7
GO:0014074	response to purine-containing compound	6/55	149/18670	4.90543e-06	5.72962e-05	2.31413e-05	SOD1/COL1A1/APP/JUN/PTGS2/RELA	6
GO:0048864	stem cell development	5/55	85/18670	5.05153e-06	5.8572e-05	2.36566e-05	EDN1/EDN3/EDNRA/MAPK1/HIF1A	5
GO:2001057	reactive nitrogen species metabolic process	5/55	85/18670	5.05153e-06	5.8572e-05	2.36566e-05	TNF/EDN1/ICAM1/NOS3/PTGS2	5
GO:0048754	branching morphogenesis of an epithelial tube	6/55	150/18670	5.09833e-06	5.88996e-05	2.3789e-05	TNF/ESR1/EDN1/BCL2/VEGFA/EDNRA	6
GO:0045080	positive regulation of chemokine biosynthetic process	3/55	12/18670	5.223e-06	6.01213e-05	2.42824e-05	TNF/APP/HMOX1	3
GO:0016999	antibiotic metabolic process	6/55	151/18670	5.29735e-06	6.0757e-05	2.45391e-05	ADH1C/SOD1/SNCA/STAT3/HBA2/ABCC2	6
GO:0006919	activation of cysteine-type endopeptidase activity involved in apoptotic process	5/55	86/18670	5.3514e-06	6.11561e-05	2.47003e-05	TNF/NGFR/SNCA/VCP/CASP9	5
GO:0001990	regulation of systemic arterial blood pressure by hormone	4/55	40/18670	5.69264e-06	6.45911e-05	2.60877e-05	EDN1/EDN3/NOS3/ECE1	4
GO:0071548	response to dexamethasone	4/55	40/18670	5.69264e-06	6.45911e-05	2.60877e-05	EDN1/ICAM1/CASP9/ABCC2	4
GO:1904035	regulation of epithelial cell apoptotic process	5/55	88/18670	5.99293e-06	6.77564e-05	2.73661e-05	TNF/SERPINE1/ICAM1/HMOX1/CCL2	5
GO:0150077	regulation of neuroinflammatory response	4/55	41/18670	6.29429e-06	7.09113e-05	2.86403e-05	TNF/CCL3/MMP9/PTGS2	4
GO:0014033	neural crest cell differentiation	5/55	90/18670	6.69323e-06	7.46325e-05	3.01433e-05	EDN1/EDN3/EDNRA/MAPK1/HIF1A	5
GO:1903035	negative regulation of response to wounding	5/55	90/18670	6.69323e-06	7.46325e-05	3.01433e-05	F2/PLAU/SERPINE1/EDN1/NOS3	5
GO:1904951	positive regulation of establishment of protein localization	9/55	456/18670	6.70683e-06	7.46325e-05	3.01433e-05	TNF/TP53/CCL3/BCL2/DRD2/MAPK1/PTGS2/MMP12/HIF1A	9
GO:1904062	regulation of cation transmembrane transport	8/55	342/18670	6.71857e-06	7.46325e-05	3.01433e-05	F2/APP/NEFL/CCL2/EDN3/DRD2/MMP9/SNCA	8
GO:0031650	regulation of heat generation	3/55	13/18670	6.77573e-06	7.47448e-05	3.01887e-05	TNF/CNR1/PTGS2	3
GO:0033004	negative regulation of mast cell activation	3/55	13/18670	6.77573e-06	7.47448e-05	3.01887e-05	HMOX1/CNR1/CNR2	3
GO:0043467	regulation of generation of precursor metabolites and energy	6/55	158/18670	6.87466e-06	7.55737e-05	3.05234e-05	TP53/APP/SNCA/STAT3/VCP/HIF1A	6
GO:0010721	negative regulation of cell development	8/55	344/18670	7.01112e-06	7.6808e-05	3.1022e-05	F2/TNF/TP53/APP/NGFR/BCL2/VEGFA/STAT3	8
GO:2000117	negative regulation of cysteine-type endopeptidase activity	5/55	92/18670	7.45606e-06	8.1276e-05	3.28266e-05	NGFR/MMP9/VEGFA/PTGS2/SNCA	5
GO:0048638	regulation of developmental growth	8/55	347/18670	7.47013e-06	8.1276e-05	3.28266e-05	SOD1/APP/EDN1/BCL2/DRD2/VEGFA/MAPK1/STAT3	8
GO:0045429	positive regulation of nitric oxide biosynthetic process	4/55	43/18670	7.63694e-06	8.28074e-05	3.34451e-05	TNF/EDN1/ICAM1/PTGS2	4
GO:0003073	regulation of systemic arterial blood pressure	5/55	93/18670	7.86214e-06	8.46713e-05	3.41979e-05	EDN1/EDN3/DRD2/NOS3/ECE1	5
GO:0035249	synaptic transmission, glutamatergic	5/55	93/18670	7.86214e-06	8.46713e-05	3.41979e-05	TNF/CCL2/DRD2/CNR1/PTGS2	5
GO:0043254	regulation of protein complex assembly	9/55	467/18670	8.12414e-06	8.71973e-05	3.52181e-05	TNF/ESR1/MMP1/TP53/ICAM1/JUN/VEGFA/SNCA/VCP	9
GO:0051170	import into nucleus	6/55	163/18670	8.21937e-06	8.79223e-05	3.55109e-05	TP53/NFKBIA/MAPK1/PTGS2/MMP12/STAT3	6
GO:0010951	negative regulation of endopeptidase activity	7/55	250/18670	8.32795e-06	8.84737e-05	3.57336e-05	APP/SERPINE1/NGFR/MMP9/VEGFA/PTGS2/SNCA	7
GO:0030072	peptide hormone secretion	7/55	250/18670	8.32795e-06	8.84737e-05	3.57336e-05	TNF/EDN1/EDN3/DRD2/CNR1/DPP4/HIF1A	7
GO:0046688	response to copper ion	4/55	44/18670	8.38231e-06	8.84737e-05	3.57336e-05	SOD1/APP/ICAM1/SNCA	4
GO:1904407	positive regulation of nitric oxide metabolic process	4/55	44/18670	8.38231e-06	8.84737e-05	3.57336e-05	TNF/EDN1/ICAM1/PTGS2	4
GO:0001505	regulation of neurotransmitter levels	8/55	354/18670	8.64105e-06	9.09027e-05	3.67147e-05	TNF/EDN1/ICAM1/DRD2/CNR1/NOS3/PTGS2/SNCA	8
GO:0042116	macrophage activation	5/55	95/18670	8.72614e-06	9.11939e-05	3.68323e-05	TNF/APP/JUN/CCL3/SNCA	5
GO:0051196	regulation of coenzyme metabolic process	5/55	95/18670	8.72614e-06	9.11939e-05	3.68323e-05	TP53/APP/SNCA/STAT3/HIF1A	5
GO:2001169	regulation of ATP biosynthetic process	5/55	96/18670	9.18508e-06	9.56754e-05	3.86423e-05	TP53/APP/STAT3/VCP/HIF1A	5
GO:0090596	sensory organ morphogenesis	7/55	256/18670	9.71905e-06	0.000100907	4.07551e-05	SOD1/EDN1/BCL2/VEGFA/MAPK1/STAT3/HIF1A	7
GO:0014075	response to amine	4/55	46/18670	1.00324e-05	0.000103148	4.16606e-05	SOD1/ICAM1/DRD2/CNR2	4
GO:0033628	regulation of cell adhesion mediated by integrin	4/55	46/18670	1.00324e-05	0.000103148	4.16606e-05	PLAU/SERPINE1/MUC1/DPP4	4
GO:0071354	cellular response to interleukin-6	4/55	46/18670	1.00324e-05	0.000103148	4.16606e-05	ICAM1/STAT3/RELA/ABCC2	4
GO:0034765	regulation of ion transmembrane transport	9/55	483/18670	1.06406e-05	0.000109049	4.40439e-05	F2/APP/NEFL/ABCB1/CCL2/EDN3/DRD2/MMP9/SNCA	9
GO:0045073	regulation of chemokine biosynthetic process	3/55	15/18670	1.07346e-05	0.000109307	4.41481e-05	TNF/APP/HMOX1	3
GO:0045410	positive regulation of interleukin-6 biosynthetic process	3/55	15/18670	1.07346e-05	0.000109307	4.41481e-05	TNF/APP/STAT3	3
GO:0030574	collagen catabolic process	4/55	47/18670	1.09417e-05	0.000110706	4.47131e-05	MMP1/MMP2/MMP9/MMP12	4
GO:1903580	positive regulation of ATP metabolic process	4/55	47/18670	1.09417e-05	0.000110706	4.47131e-05	APP/STAT3/VCP/HIF1A	4
GO:0048871	multicellular organismal homeostasis	9/55	485/18670	1.09977e-05	0.00011092	4.47994e-05	SOD1/TNF/BCL2/DRD2/VEGFA/CNR1/NOS3/PTGS2/STAT3	9
GO:0010466	negative regulation of peptidase activity	7/55	262/18670	1.12979e-05	0.000113587	4.58766e-05	APP/SERPINE1/NGFR/MMP9/VEGFA/PTGS2/SNCA	7
GO:0001659	temperature homeostasis	6/55	173/18670	1.15497e-05	0.000115752	4.67511e-05	TNF/DRD2/VEGFA/CNR1/PTGS2/STAT3	6
GO:0046883	regulation of hormone secretion	7/55	266/18670	1.24644e-05	0.000124526	5.02947e-05	TNF/EDN1/EDN3/DRD2/CNR1/DPP4/HIF1A	7
GO:0001701	in utero embryonic development	8/55	373/18670	1.26292e-05	0.000125777	5.08002e-05	TP53/EDN1/VEGFA/EDNRA/MAPK1/NOS3/BCL2L1/HIF1A	8
GO:0003044	regulation of systemic arterial blood pressure mediated by a chemical signal	4/55	49/18670	1.29408e-05	0.000128478	5.18908e-05	EDN1/EDN3/NOS3/ECE1	4
GO:0006914	autophagy	9/55	496/18670	1.31508e-05	0.000128486	5.18942e-05	TP53/HMOX1/BCL2/DRD2/SNCA/STAT3/CASP3/VCP/HIF1A	9
GO:0061919	process utilizing autophagic mechanism	9/55	496/18670	1.31508e-05	0.000128486	5.18942e-05	TP53/HMOX1/BCL2/DRD2/SNCA/STAT3/CASP3/VCP/HIF1A	9
GO:0032225	regulation of synaptic transmission, dopaminergic	3/55	16/18670	1.31843e-05	0.000128486	5.18942e-05	DRD2/PTGS2/SNCA	3
GO:0042033	chemokine biosynthetic process	3/55	16/18670	1.31843e-05	0.000128486	5.18942e-05	TNF/APP/HMOX1	3
GO:0050755	chemokine metabolic process	3/55	16/18670	1.31843e-05	0.000128486	5.18942e-05	TNF/APP/HMOX1	3
GO:1902004	positive regulation of amyloid-beta formation	3/55	16/18670	1.31843e-05	0.000128486	5.18942e-05	TNF/APP/CASP3	3
GO:0043491	protein kinase B signaling	7/55	269/18670	1.34033e-05	0.000130221	5.25948e-05	F10/TNF/ESR1/F7/CCL3/CCL2/DRD2	7
GO:0010950	positive regulation of endopeptidase activity	6/55	178/18670	1.35833e-05	0.000131567	5.31387e-05	TNF/NGFR/SNCA/STAT3/VCP/CASP9	6
GO:1903034	regulation of response to wounding	6/55	179/18670	1.40228e-05	0.000135122	5.45746e-05	F2/PLAU/SERPINE1/EDN1/F7/NOS3	6
GO:0070741	response to interleukin-6	4/55	50/18670	1.40354e-05	0.000135122	5.45746e-05	ICAM1/STAT3/RELA/ABCC2	4
GO:0071466	cellular response to xenobiotic stimulus	6/55	180/18670	1.44737e-05	0.000138921	5.61088e-05	ICAM1/GSTM1/PTGS1/CYP2C19/CASP9/ABCC2	6
GO:0043542	endothelial cell migration	7/55	273/18670	1.47457e-05	0.000141105	5.6991e-05	EDN1/HMOX1/VEGFA/DPP4/NOS3/PTGS2/HIF1A	7
GO:0042136	neurotransmitter biosynthetic process	5/55	106/18670	1.48925e-05	0.000142083	5.73857e-05	TNF/EDN1/ICAM1/NOS3/PTGS2	5
GO:0007566	embryo implantation	4/55	51/18670	1.51967e-05	0.000144119	5.82081e-05	SOD1/MMP2/MMP9/PTGS2	4
GO:0097366	response to bronchodilator	4/55	51/18670	1.51967e-05	0.000144119	5.82081e-05	SOD1/ICAM1/DRD2/CNR2	4
GO:0045765	regulation of angiogenesis	8/55	383/18670	1.52884e-05	0.000144557	5.83851e-05	SERPINE1/NGFR/HMOX1/VEGFA/NOS3/PTGS2/STAT3/HIF1A	8
GO:0061138	morphogenesis of a branching epithelium	6/55	182/18670	1.54107e-05	0.000145281	5.86776e-05	TNF/ESR1/EDN1/BCL2/VEGFA/EDNRA	6
GO:0062014	negative regulation of small molecule metabolic process	5/55	107/18670	1.55877e-05	0.000146516	5.91761e-05	SOD1/TP53/CNR1/SNCA/STAT3	5
GO:0031649	heat generation	3/55	17/18670	1.59761e-05	0.000149282	6.02936e-05	TNF/CNR1/PTGS2	3
GO:1904996	positive regulation of leukocyte adhesion to vascular endothelial cell	3/55	17/18670	1.59761e-05	0.000149282	6.02936e-05	TNF/ICAM1/RELA	3
GO:0030100	regulation of endocytosis	7/55	281/18670	1.7766e-05	0.000165521	6.68521e-05	SOD1/TNF/SERPINE1/CCL2/DRD2/VEGFA/SNCA	7
GO:0019362	pyridine nucleotide metabolic process	6/55	189/18670	1.90841e-05	0.000175665	7.09493e-05	TP53/APP/PTGS2/STAT3/VCP/HIF1A	6
GO:0046496	nicotinamide nucleotide metabolic process	6/55	189/18670	1.90841e-05	0.000175665	7.09493e-05	TP53/APP/PTGS2/STAT3/VCP/HIF1A	6
GO:0051353	positive regulation of oxidoreductase activity	4/55	54/18670	1.9106e-05	0.000175665	7.09493e-05	TNF/EDN1/SNCA/HIF1A	4
GO:0060749	mammary gland alveolus development	3/55	18/18670	1.91313e-05	0.000175665	7.09493e-05	ESR1/VEGFA/HIF1A	3
GO:0061377	mammary gland lobule development	3/55	18/18670	1.91313e-05	0.000175665	7.09493e-05	ESR1/VEGFA/HIF1A	3
GO:0001938	positive regulation of endothelial cell proliferation	5/55	112/18670	1.94525e-05	0.000178099	7.19326e-05	JUN/HMOX1/VEGFA/STAT3/HIF1A	5
GO:0001503	ossification	8/55	398/18670	2.01535e-05	0.000183988	7.43107e-05	TNF/COL1A1/MMP2/CCL3/BCL2/MAPK1/PTGS2/HIF1A	8
GO:0042035	regulation of cytokine biosynthetic process	5/55	114/18670	2.1192e-05	0.000192914	7.79158e-05	TNF/APP/HMOX1/STAT3/RELA	5
GO:0072524	pyridine-containing compound metabolic process	6/55	195/18670	2.27679e-05	0.000206667	8.34708e-05	TP53/APP/PTGS2/STAT3/VCP/HIF1A	6
GO:0007569	cell aging	5/55	116/18670	2.30502e-05	0.000208634	8.4265e-05	SOD1/TP53/SERPINE1/ICAM1/BCL2	5
GO:0042743	hydrogen peroxide metabolic process	4/55	57/18670	2.37084e-05	0.000213375	8.61801e-05	SOD1/SNCA/STAT3/HBA2	4
GO:1903428	positive regulation of reactive oxygen species biosynthetic process	4/55	57/18670	2.37084e-05	0.000213375	8.61801e-05	TNF/EDN1/ICAM1/PTGS2	4
GO:1901222	regulation of NIK/NF-kappaB signaling	5/55	117/18670	2.40256e-05	0.000215619	8.70864e-05	TNF/APP/EDN1/NFKBIA/RELA	5
GO:1903522	regulation of blood circulation	7/55	297/18670	2.53525e-05	0.000225279	9.09878e-05	EDN1/ICAM1/EDN3/DRD2/NOS3/PTGS2/ECE1	7
GO:0032722	positive regulation of chemokine production	4/55	58/18670	2.5409e-05	0.000225279	9.09878e-05	TNF/APP/HMOX1/HIF1A	4
GO:0071385	cellular response to glucocorticoid stimulus	4/55	58/18670	2.5409e-05	0.000225279	9.09878e-05	EDN1/ICAM1/CASP9/ABCC2	4
GO:0017038	protein import	6/55	199/18670	2.55274e-05	0.000225279	9.09878e-05	TP53/NFKBIA/MAPK1/PTGS2/MMP12/STAT3	6
GO:0034341	response to interferon-gamma	6/55	199/18670	2.55274e-05	0.000225279	9.09878e-05	TP53/EDN1/ICAM1/CCL3/CCL2/SNCA	6
GO:0050866	negative regulation of cell activation	6/55	199/18670	2.55274e-05	0.000225279	9.09878e-05	F2/HMOX1/CNR1/NOS3/CNR2/CASP3	6
GO:0001952	regulation of cell-matrix adhesion	5/55	119/18670	2.60725e-05	0.000228819	9.24175e-05	PLAU/SERPINE1/BCL2/VEGFA/MMP12	5
GO:0051193	regulation of cofactor metabolic process	5/55	119/18670	2.60725e-05	0.000228819	9.24175e-05	TP53/APP/SNCA/STAT3/HIF1A	5
GO:0018105	peptidyl-serine phosphorylation	7/55	299/18670	2.64649e-05	0.000231622	9.35499e-05	TNF/APP/BCL2/VEGFA/MAPK1/PTGS2/SNCA	7
GO:0032769	negative regulation of monooxygenase activity	3/55	20/18670	2.66161e-05	0.00023167	9.3569e-05	CNR1/CNR2/SNCA	3
GO:1902993	positive regulation of amyloid precursor protein catabolic process	3/55	20/18670	2.66161e-05	0.00023167	9.3569e-05	TNF/APP/CASP3	3
GO:0006164	purine nucleotide biosynthetic process	7/55	300/18670	2.7036e-05	0.000234042	9.45272e-05	TP53/APP/NOS3/SNCA/STAT3/VCP/HIF1A	7
GO:0070372	regulation of ERK1 and ERK2 cascade	7/55	300/18670	2.7036e-05	0.000234042	9.45272e-05	TNF/APP/ICAM1/JUN/CCL3/CCL2/DRD2	7
GO:0072089	stem cell proliferation	5/55	120/18670	2.71455e-05	0.000234164	9.45765e-05	TP53/ABCB1/DRD2/VEGFA/HIF1A	5
GO:2000351	regulation of endothelial cell apoptotic process	4/55	59/18670	2.71975e-05	0.000234164	9.45765e-05	TNF/SERPINE1/ICAM1/CCL2	4
GO:0051222	positive regulation of protein transport	8/55	418/18670	2.86137e-05	0.000245691	9.92323e-05	TNF/TP53/CCL3/DRD2/MAPK1/PTGS2/MMP12/HIF1A	8
GO:0002573	myeloid leukocyte differentiation	6/55	204/18670	2.93492e-05	0.000251036	0.000101391	TNF/APP/JUN/CCL3/MMP9/VEGFA	6
GO:0034101	erythrocyte homeostasis	5/55	122/18670	2.93943e-05	0.000251036	0.000101391	HMOX1/VEGFA/STAT3/CASP3/HIF1A	5
GO:0042089	cytokine biosynthetic process	5/55	123/18670	3.05715e-05	0.000260116	0.000105058	TNF/APP/HMOX1/STAT3/RELA	5
GO:1901342	regulation of vasculature development	8/55	422/18670	3.06212e-05	0.000260116	0.000105058	SERPINE1/NGFR/HMOX1/VEGFA/NOS3/PTGS2/STAT3/HIF1A	8
GO:0014821	phasic smooth muscle contraction	3/55	21/18670	3.09874e-05	0.000260274	0.000105122	EDN1/EDN3/DRD2	3
GO:0050679	positive regulation of epithelial cell proliferation	6/55	206/18670	3.10012e-05	0.000260274	0.000105122	JUN/HMOX1/VEGFA/MMP12/STAT3/HIF1A	6
GO:0007405	neuroblast proliferation	4/55	61/18670	3.10493e-05	0.000260274	0.000105122	TP53/DRD2/VEGFA/HIF1A	4
GO:0071384	cellular response to corticosteroid stimulus	4/55	61/18670	3.10493e-05	0.000260274	0.000105122	EDN1/ICAM1/CASP9/ABCC2	4
GO:2001244	positive regulation of intrinsic apoptotic signaling pathway	4/55	61/18670	3.10493e-05	0.000260274	0.000105122	SOD1/TP53/BCL2/BCL2L1	4
GO:0008637	apoptotic mitochondrial changes	5/55	124/18670	3.17851e-05	0.000264237	0.000106723	TP53/JUN/BCL2/MMP9/BCL2L1	5
GO:0042107	cytokine metabolic process	5/55	124/18670	3.17851e-05	0.000264237	0.000106723	TNF/APP/HMOX1/STAT3/RELA	5
GO:0002064	epithelial cell development	6/55	207/18670	3.18548e-05	0.000264237	0.000106723	SOD1/TNF/ESR1/ICAM1/VEGFA/HIF1A	6
GO:0006733	oxidoreduction coenzyme metabolic process	6/55	207/18670	3.18548e-05	0.000264237	0.000106723	TP53/APP/PTGS2/STAT3/VCP/HIF1A	6
GO:0007623	circadian rhythm	6/55	208/18670	3.27272e-05	0.000270767	0.00010936	TP53/SERPINE1/JUN/NGFR/F7/DRD2	6
GO:0045471	response to ethanol	5/55	125/18670	3.30358e-05	0.000272609	0.000110104	SOD1/ICAM1/DRD2/CNR1/STAT3	5
GO:0071229	cellular response to acid chemical	6/55	209/18670	3.36188e-05	0.000276702	0.000111757	TNF/COL1A1/EDN1/MMP2/VEGFA/BCL2L1	6
GO:0097529	myeloid leukocyte migration	6/55	210/18670	3.45297e-05	0.000283465	0.000114489	SERPINE1/EDN1/CCL3/CCL2/EDN3/VEGFA	6
GO:0046879	hormone secretion	7/55	312/18670	3.47208e-05	0.000284299	0.000114825	TNF/EDN1/EDN3/DRD2/CNR1/DPP4/HIF1A	7
GO:0072522	purine-containing compound biosynthetic process	7/55	313/18670	3.54349e-05	0.000288866	0.00011667	TP53/APP/NOS3/SNCA/STAT3/VCP/HIF1A	7
GO:1903531	negative regulation of secretion by cell	6/55	211/18670	3.54604e-05	0.000288866	0.00011667	TNF/EDN1/HMOX1/DRD2/CNR1/SNCA	6
GO:0002052	positive regulation of neuroblast proliferation	3/55	22/18670	3.58053e-05	0.00029093	0.000117503	DRD2/VEGFA/HIF1A	3
GO:0060135	maternal process involved in female pregnancy	4/55	64/18670	3.75569e-05	0.000303609	0.000122625	ESR1/CNR1/MAPK1/PTGS2	4
GO:2000378	negative regulation of reactive oxygen species metabolic process	4/55	64/18670	3.75569e-05	0.000303609	0.000122625	TP53/BCL2/STAT3/HIF1A	4
GO:0015893	drug transport	6/55	214/18670	3.83741e-05	0.000309428	0.000124975	EDN1/DRD2/CNR1/SNCA/HBA2/ABCC2	6
GO:0010810	regulation of cell-substrate adhesion	6/55	215/18670	3.9387e-05	0.000316791	0.000127949	PLAU/COL1A1/SERPINE1/BCL2/VEGFA/MMP12	6
GO:0051187	cofactor catabolic process	4/55	65/18670	3.99325e-05	0.000318757	0.000128743	HMOX1/SNCA/VCP/HBA2	4
GO:0072577	endothelial cell apoptotic process	4/55	65/18670	3.99325e-05	0.000318757	0.000128743	TNF/SERPINE1/ICAM1/CCL2	4
GO:0072678	T cell migration	4/55	65/18670	3.99325e-05	0.000318757	0.000128743	APP/ICAM1/CCL3/CCL2	4
GO:0045428	regulation of nitric oxide biosynthetic process	4/55	66/18670	4.24161e-05	0.00033695	0.000136091	TNF/EDN1/ICAM1/PTGS2	4
GO:0018209	peptidyl-serine modification	7/55	322/18670	4.24236e-05	0.00033695	0.000136091	TNF/APP/BCL2/VEGFA/MAPK1/PTGS2/SNCA	7
GO:0043280	positive regulation of cysteine-type endopeptidase activity involved in apoptotic process	5/55	132/18670	4.28957e-05	0.000339849	0.000137262	TNF/NGFR/SNCA/VCP/CASP9	5
GO:1903829	positive regulation of cellular protein localization	7/55	324/18670	4.41211e-05	0.000348689	0.000140832	F2/TNF/TP53/NGFR/BCL2/MAPK1/PTGS2	7
GO:0002526	acute inflammatory response	6/55	220/18670	4.47786e-05	0.000353006	0.000142576	F2/TNF/ICAM1/CNR1/PTGS2/STAT3	6
GO:0051188	cofactor biosynthetic process	7/55	326/18670	4.58741e-05	0.000360748	0.000145702	SOD1/TP53/APP/PTGS2/SNCA/STAT3/HIF1A	7
GO:0007006	mitochondrial membrane organization	5/55	134/18670	4.60929e-05	0.000361574	0.000146036	TP53/BCL2/SNCA/STAT3/BCL2L1	5
GO:0010506	regulation of autophagy	7/55	327/18670	4.67718e-05	0.000365995	0.000147822	TP53/HMOX1/BCL2/SNCA/STAT3/CASP3/HIF1A	7
GO:0071230	cellular response to amino acid stimulus	4/55	68/18670	4.77199e-05	0.000372496	0.000150448	TNF/COL1A1/MMP2/BCL2L1	4
GO:0008088	axo-dendritic transport	4/55	69/18670	5.05461e-05	0.000393591	0.000158967	SOD1/APP/NEFL/HIF1A	4
GO:0009299	mRNA transcription	3/55	25/18670	5.31416e-05	0.000410781	0.00016591	TP53/STAT3/HIF1A	3
GO:0014829	vascular smooth muscle contraction	3/55	25/18670	5.31416e-05	0.000410781	0.00016591	EDN1/EDN3/EDNRA	3
GO:0019430	removal of superoxide radicals	3/55	25/18670	5.31416e-05	0.000410781	0.00016591	SOD1/TNF/NOS3	3
GO:0071902	positive regulation of protein serine/threonine kinase activity	7/55	334/18670	5.34687e-05	0.000411492	0.000166198	SOD1/TNF/EDN1/EDN3/VEGFA/MAPK1/SNCA	7
GO:0072091	regulation of stem cell proliferation	4/55	70/18670	5.34927e-05	0.000411492	0.000166198	TP53/DRD2/VEGFA/HIF1A	4
GO:0010594	regulation of endothelial cell migration	6/55	229/18670	5.59668e-05	0.000429484	0.000173464	EDN1/HMOX1/VEGFA/NOS3/PTGS2/HIF1A	6
GO:0050795	regulation of behavior	4/55	71/18670	5.65628e-05	0.000433012	0.000174889	CCL3/DRD2/CNR1/STAT3	4
GO:0023061	signal release	8/55	462/18670	5.80711e-05	0.00044349	0.000179121	TNF/EDN1/EDN3/DRD2/CNR1/DPP4/SNCA/HIF1A	8
GO:0050805	negative regulation of synaptic transmission	4/55	72/18670	5.97595e-05	0.000448128	0.000180994	DRD2/CNR2/PTGS2/SNCA	4
GO:0051881	regulation of mitochondrial membrane potential	4/55	72/18670	5.97595e-05	0.000448128	0.000180994	SOD1/BCL2/VCP/BCL2L1	4
GO:0042110	T cell activation	8/55	464/18670	5.98579e-05	0.000448128	0.000180994	SOD1/TP53/ICAM1/BCL2/CCL2/DPP4/STAT3/CASP3	8
GO:0002360	T cell lineage commitment	3/55	26/18670	5.99479e-05	0.000448128	0.000180994	TP53/BCL2/STAT3	3
GO:0030194	positive regulation of blood coagulation	3/55	26/18670	5.99479e-05	0.000448128	0.000180994	F2/SERPINE1/F7	3
GO:0032800	receptor biosynthetic process	3/55	26/18670	5.99479e-05	0.000448128	0.000180994	TNF/EDN1/HIF1A	3
GO:0048169	regulation of long-term neuronal synaptic plasticity	3/55	26/18670	5.99479e-05	0.000448128	0.000180994	APP/DRD2/SNCA	3
GO:1900048	positive regulation of hemostasis	3/55	26/18670	5.99479e-05	0.000448128	0.000180994	F2/SERPINE1/F7	3
GO:1903579	negative regulation of ATP metabolic process	3/55	26/18670	5.99479e-05	0.000448128	0.000180994	TP53/SNCA/STAT3	3
GO:0042445	hormone metabolic process	6/55	232/18670	6.0157e-05	0.000448636	0.000181199	ADH1C/TNF/TTR/ESR1/ECE1/HIF1A	6
GO:0003012	muscle system process	8/55	465/18670	6.07683e-05	0.000452133	0.000182612	SOD1/EDN1/HMOX1/EDN3/DRD2/EDNRA/NOS3/PTGS2	8
GO:0006801	superoxide metabolic process	4/55	73/18670	6.30861e-05	0.000467064	0.000188642	SOD1/TNF/EDN1/NOS3	4
GO:1903524	positive regulation of blood circulation	4/55	73/18670	6.30861e-05	0.000467064	0.000188642	EDN1/ICAM1/EDN3/PTGS2	4
GO:0072330	monocarboxylic acid biosynthetic process	7/55	343/18670	6.32161e-05	0.000467064	0.000188642	TP53/APP/EDN1/PTGS1/PTGS2/STAT3/HIF1A	7
GO:0007409	axonogenesis	8/55	468/18670	6.35693e-05	0.000468584	0.000189256	APP/NEFL/NGFR/BCL2/NEFH/DRD2/VEGFA/MAPK1	8
GO:0031670	cellular response to nutrient	4/55	74/18670	6.65457e-05	0.000485942	0.000196267	SOD1/COL1A1/HMOX1/PTGS2	4
GO:1900182	positive regulation of protein localization to nucleus	4/55	74/18670	6.65457e-05	0.000485942	0.000196267	F2/NGFR/MAPK1/PTGS2	4
GO:0007612	learning	5/55	145/18670	6.71146e-05	0.000485942	0.000196267	APP/JUN/DRD2/PTGS2/HIF1A	5
GO:0050820	positive regulation of coagulation	3/55	27/18670	6.73008e-05	0.000485942	0.000196267	F2/SERPINE1/F7	3
GO:0051953	negative regulation of amine transport	3/55	27/18670	6.73008e-05	0.000485942	0.000196267	DRD2/CNR1/SNCA	3
GO:0071450	cellular response to oxygen radical	3/55	27/18670	6.73008e-05	0.000485942	0.000196267	SOD1/TNF/NOS3	3
GO:0071451	cellular response to superoxide	3/55	27/18670	6.73008e-05	0.000485942	0.000196267	SOD1/TNF/NOS3	3
GO:0072378	blood coagulation, fibrin clot formation	3/55	27/18670	6.73008e-05	0.000485942	0.000196267	F2/F10/F7	3
GO:2000144	positive regulation of DNA-templated transcription, initiation	3/55	27/18670	6.73008e-05	0.000485942	0.000196267	ESR1/TP53/JUN	3
GO:0051048	negative regulation of secretion	6/55	238/18670	6.92904e-05	0.000499174	0.000201611	TNF/EDN1/HMOX1/DRD2/CNR1/SNCA	6
GO:0010212	response to ionizing radiation	5/55	147/18670	7.16216e-05	0.000512482	0.000206986	TP53/ICAM1/BCL2/CASP3/BCL2L1	5
GO:0019359	nicotinamide nucleotide biosynthetic process	5/55	147/18670	7.16216e-05	0.000512482	0.000206986	TP53/APP/PTGS2/STAT3/HIF1A	5
GO:0019363	pyridine nucleotide biosynthetic process	5/55	147/18670	7.16216e-05	0.000512482	0.000206986	TP53/APP/PTGS2/STAT3/HIF1A	5
GO:0046902	regulation of mitochondrial membrane permeability	4/55	76/18670	7.38772e-05	0.000527433	0.000213025	TP53/BCL2/STAT3/BCL2L1	4
GO:0001516	prostaglandin biosynthetic process	3/55	28/18670	7.52198e-05	0.000528702	0.000213537	EDN1/PTGS1/PTGS2	3
GO:0042730	fibrinolysis	3/55	28/18670	7.52198e-05	0.000528702	0.000213537	F2/PLAU/SERPINE1	3
GO:0045408	regulation of interleukin-6 biosynthetic process	3/55	28/18670	7.52198e-05	0.000528702	0.000213537	TNF/APP/STAT3	3
GO:0046457	prostanoid biosynthetic process	3/55	28/18670	7.52198e-05	0.000528702	0.000213537	EDN1/PTGS1/PTGS2	3
GO:1900543	negative regulation of purine nucleotide metabolic process	3/55	28/18670	7.52198e-05	0.000528702	0.000213537	TP53/SNCA/STAT3	3
GO:1902003	regulation of amyloid-beta formation	3/55	28/18670	7.52198e-05	0.000528702	0.000213537	TNF/APP/CASP3	3
GO:1904994	regulation of leukocyte adhesion to vascular endothelial cell	3/55	28/18670	7.52198e-05	0.000528702	0.000213537	TNF/ICAM1/RELA	3
GO:0051092	positive regulation of NF-kappaB transcription factor activity	5/55	149/18670	7.63586e-05	0.000534342	0.000215815	TNF/APP/ICAM1/STAT3/RELA	5
GO:2001056	positive regulation of cysteine-type endopeptidase activity	5/55	149/18670	7.63586e-05	0.000534342	0.000215815	TNF/NGFR/SNCA/VCP/CASP9	5
GO:1901224	positive regulation of NIK/NF-kappaB signaling	4/55	77/18670	7.77555e-05	0.000542921	0.00021928	TNF/APP/EDN1/RELA	4
GO:0008360	regulation of cell shape	5/55	150/18670	7.88159e-05	0.000547917	0.000221298	F2/ICAM1/CCL3/CCL2/VEGFA	5
GO:0072525	pyridine-containing compound biosynthetic process	5/55	150/18670	7.88159e-05	0.000547917	0.000221298	TP53/APP/PTGS2/STAT3/HIF1A	5
GO:0051896	regulation of protein kinase B signaling	6/55	244/18670	7.95002e-05	0.000551468	0.000222732	F10/TNF/ESR1/F7/CCL3/DRD2	6
GO:0000303	response to superoxide	3/55	29/18670	8.37241e-05	0.000576988	0.00023304	SOD1/TNF/NOS3	3
GO:0042226	interleukin-6 biosynthetic process	3/55	29/18670	8.37241e-05	0.000576988	0.00023304	TNF/APP/STAT3	3
GO:0045980	negative regulation of nucleotide metabolic process	3/55	29/18670	8.37241e-05	0.000576988	0.00023304	TP53/SNCA/STAT3	3
GO:0006110	regulation of glycolytic process	4/55	79/18670	8.5954e-05	0.000591073	0.000238728	TP53/APP/STAT3/HIF1A	4
GO:0042133	neurotransmitter metabolic process	5/55	153/18670	8.65548e-05	0.000593919	0.000239878	TNF/EDN1/ICAM1/NOS3/PTGS2	5
GO:0045862	positive regulation of proteolysis	7/55	363/18670	9.01515e-05	0.000617266	0.000249307	TNF/APP/NGFR/SNCA/STAT3/VCP/CASP9	7
GO:0000305	response to oxygen radical	3/55	30/18670	9.2833e-05	0.000629258	0.000254151	SOD1/TNF/NOS3	3
GO:0001782	B cell homeostasis	3/55	30/18670	9.2833e-05	0.000629258	0.000254151	BCL2/CASP3/HIF1A	3
GO:0070168	negative regulation of biomineral tissue development	3/55	30/18670	9.2833e-05	0.000629258	0.000254151	CCL3/NOS3/HIF1A	3
GO:0071549	cellular response to dexamethasone stimulus	3/55	30/18670	9.2833e-05	0.000629258	0.000254151	ICAM1/CASP9/ABCC2	3
GO:0045637	regulation of myeloid cell differentiation	6/55	251/18670	9.28933e-05	0.000629258	0.000254151	TNF/JUN/CCL3/NFKBIA/STAT3/HIF1A	6
GO:0030811	regulation of nucleotide catabolic process	4/55	81/18670	9.47639e-05	0.000638537	0.000257899	TP53/APP/STAT3/HIF1A	4
GO:0034767	positive regulation of ion transmembrane transport	5/55	156/18670	9.48661e-05	0.000638537	0.000257899	F2/ABCB1/CCL2/EDN3/SNCA	5
GO:0043535	regulation of blood vessel endothelial cell migration	5/55	156/18670	9.48661e-05	0.000638537	0.000257899	HMOX1/VEGFA/NOS3/PTGS2/HIF1A	5
GO:0030279	negative regulation of ossification	4/55	82/18670	9.94067e-05	0.000666277	0.000269102	TNF/CCL3/BCL2/HIF1A	4
GO:0032642	regulation of chemokine production	4/55	82/18670	9.94067e-05	0.000666277	0.000269102	TNF/APP/HMOX1/HIF1A	4
GO:0060402	calcium ion transport into cytosol	5/55	158/18670	0.000100739	0.000673785	0.000272135	F2/CCL3/BCL2/DRD2/SNCA	5
GO:0001963	synaptic transmission, dopaminergic	3/55	31/18670	0.000102565	0.000678853	0.000274182	DRD2/PTGS2/SNCA	3
GO:0002675	positive regulation of acute inflammatory response	3/55	31/18670	0.000102565	0.000678853	0.000274182	TNF/CNR1/PTGS2	3
GO:0043457	regulation of cellular respiration	3/55	31/18670	0.000102565	0.000678853	0.000274182	SNCA/VCP/HIF1A	3
GO:1902230	negative regulation of intrinsic apoptotic signaling pathway in response to DNA damage	3/55	31/18670	0.000102565	0.000678853	0.000274182	BCL2/MUC1/BCL2L1	3
GO:1902253	regulation of intrinsic apoptotic signaling pathway by p53 class mediator	3/55	31/18670	0.000102565	0.000678853	0.000274182	TP53/BCL2/MUC1	3
GO:0007187	G protein-coupled receptor signaling pathway, coupled to cyclic nucleotide second messenger	6/55	256/18670	0.000103516	0.000682306	0.000275576	EDN1/CCL2/DRD2/CNR1/EDNRA/CNR2	6
GO:0050730	regulation of peptidyl-tyrosine phosphorylation	6/55	256/18670	0.000103516	0.000682306	0.000275576	TNF/TP53/APP/ICAM1/VEGFA/STAT3	6
GO:0006754	ATP biosynthetic process	5/55	160/18670	0.000106888	0.000703069	0.000283962	TP53/APP/STAT3/VCP/HIF1A	5
GO:0043406	positive regulation of MAP kinase activity	6/55	258/18670	0.000108027	0.000709095	0.000286396	SOD1/TNF/EDN1/EDN3/VEGFA/MAPK1	6
GO:0050886	endocrine process	4/55	84/18670	0.000109185	0.000715217	0.000288869	EDN1/EDN3/NOS3/ECE1	4
GO:0010970	transport along microtubule	5/55	161/18670	0.000110068	0.000718042	0.00029001	SOD1/APP/NEFL/NEFH/HIF1A	5
GO:0099111	microtubule-based transport	5/55	161/18670	0.000110068	0.000718042	0.00029001	SOD1/APP/NEFL/NEFH/HIF1A	5
GO:0032412	regulation of ion transmembrane transporter activity	6/55	260/18670	0.000112693	0.000732263	0.000295754	APP/NEFL/ABCB1/CCL2/DRD2/MMP9	6
GO:0001569	branching involved in blood vessel morphogenesis	3/55	32/18670	0.00011294	0.000732263	0.000295754	EDN1/VEGFA/EDNRA	3
GO:0032228	regulation of synaptic transmission, GABAergic	3/55	32/18670	0.00011294	0.000732263	0.000295754	DRD2/CNR1/CNR2	3
GO:0009108	coenzyme biosynthetic process	6/55	261/18670	0.000115085	0.000744654	0.000300758	TP53/APP/PTGS2/SNCA/STAT3/HIF1A	6
GO:0031214	biomineral tissue development	5/55	163/18670	0.000116647	0.000753225	0.00030422	COL1A1/CCL3/NOS3/PTGS2/HIF1A	5
GO:0060291	long-term synaptic potentiation	4/55	86/18670	0.000119643	0.000769446	0.000310771	APP/DRD2/MAPK1/SNCA	4
GO:0090559	regulation of membrane permeability	4/55	86/18670	0.000119643	0.000769446	0.000310771	TP53/BCL2/STAT3/BCL2L1	4
GO:0031330	negative regulation of cellular catabolic process	6/55	264/18670	0.000122505	0.000786261	0.000317563	TP53/HMOX1/BCL2/CNR1/SNCA/STAT3	6
GO:0014072	response to isoquinoline alkaloid	3/55	33/18670	0.000123975	0.000789314	0.000318796	DRD2/CNR1/RELA	3
GO:0043278	response to morphine	3/55	33/18670	0.000123975	0.000789314	0.000318796	DRD2/CNR1/RELA	3
GO:0051194	positive regulation of cofactor metabolic process	3/55	33/18670	0.000123975	0.000789314	0.000318796	APP/SNCA/HIF1A	3
GO:2001024	negative regulation of response to drug	3/55	33/18670	0.000123975	0.000789314	0.000318796	DRD2/CNR1/SNCA	3
GO:1901653	cellular response to peptide	7/55	385/18670	0.000129931	0.000825584	0.000333445	TP53/APP/EDN1/ICAM1/NGFR/STAT3/RELA	7
GO:0043470	regulation of carbohydrate catabolic process	4/55	88/18670	0.00013081	0.000826207	0.000333697	TP53/APP/STAT3/HIF1A	4
GO:0070098	chemokine-mediated signaling pathway	4/55	88/18670	0.00013081	0.000826207	0.000333697	EDN1/CCL3/CCL2/HIF1A	4
GO:2000177	regulation of neural precursor cell proliferation	4/55	88/18670	0.00013081	0.000826207	0.000333697	TP53/DRD2/VEGFA/HIF1A	4
GO:0034205	amyloid-beta formation	3/55	34/18670	0.000135689	0.000850417	0.000343475	TNF/APP/CASP3	3
GO:0071868	cellular response to monoamine stimulus	3/55	34/18670	0.000135689	0.000850417	0.000343475	APP/MAPK1/SNCA	3
GO:0071870	cellular response to catecholamine stimulus	3/55	34/18670	0.000135689	0.000850417	0.000343475	APP/MAPK1/SNCA	3
GO:0007249	I-kappaB kinase/NF-kappaB signaling	6/55	269/18670	0.000135713	0.000850417	0.000343475	TNF/ESR1/HMOX1/NFKBIA/ATP2C1/RELA	6
GO:0032602	chemokine production	4/55	89/18670	0.000136667	0.000854708	0.000345208	TNF/APP/HMOX1/HIF1A	4
GO:0045927	positive regulation of growth	6/55	270/18670	0.000138486	0.00086438	0.000349114	F2/EDN1/BCL2/DRD2/VEGFA/MAPK1	6
GO:0071674	mononuclear cell migration	4/55	90/18670	0.000142713	0.000889015	0.000359064	TNF/SERPINE1/CCL3/CCL2	4
GO:0009206	purine ribonucleoside triphosphate biosynthetic process	5/55	171/18670	0.000146032	0.000906137	0.00036598	TP53/APP/STAT3/VCP/HIF1A	5
GO:0060401	cytosolic calcium ion transport	5/55	171/18670	0.000146032	0.000906137	0.00036598	F2/CCL3/BCL2/DRD2/SNCA	5
GO:0051354	negative regulation of oxidoreductase activity	3/55	35/18670	0.000148101	0.000913624	0.000369003	CNR1/CNR2/SNCA	3
GO:0071312	cellular response to alkaloid	3/55	35/18670	0.000148101	0.000913624	0.000369003	ICAM1/CASP3/BCL2L1	3
GO:1902991	regulation of amyloid precursor protein catabolic process	3/55	35/18670	0.000148101	0.000913624	0.000369003	TNF/APP/CASP3	3
GO:0045639	positive regulation of myeloid cell differentiation	4/55	91/18670	0.000148949	0.000917076	0.000370398	TNF/JUN/STAT3/HIF1A	4
GO:0009145	purine nucleoside triphosphate biosynthetic process	5/55	172/18670	0.000150069	0.000922185	0.000372461	TP53/APP/STAT3/VCP/HIF1A	5
GO:0010469	regulation of signaling receptor activity	5/55	173/18670	0.000154192	0.00094569	0.000381954	PLAU/APP/SERPINE1/NEFL/CCL2	5
GO:1901099	negative regulation of signal transduction in absence of ligand	3/55	36/18670	0.000161228	0.00098315	0.000397084	TNF/BCL2/BCL2L1	3
GO:2000310	regulation of NMDA receptor activity	3/55	36/18670	0.000161228	0.00098315	0.000397084	APP/NEFL/CCL2	3
GO:2001240	negative regulation of extrinsic apoptotic signaling pathway in absence of ligand	3/55	36/18670	0.000161228	0.00098315	0.000397084	TNF/BCL2/BCL2L1	3
GO:0033273	response to vitamin	4/55	93/18670	0.000162011	0.00098603	0.000398248	COL1A1/F7/PTGS2/RELA	4
GO:0050796	regulation of insulin secretion	5/55	176/18670	0.000167081	0.00101301	0.000409145	TNF/DRD2/CNR1/DPP4/HIF1A	5
GO:0051897	positive regulation of protein kinase B signaling	5/55	176/18670	0.000167081	0.00101301	0.000409145	F10/TNF/ESR1/F7/CCL3	5
GO:0009152	purine ribonucleotide biosynthetic process	6/55	280/18670	0.00016876	0.00102124	0.000412469	TP53/APP/SNCA/STAT3/VCP/HIF1A	6
GO:0009201	ribonucleoside triphosphate biosynthetic process	5/55	177/18670	0.000171556	0.00103612	0.00041848	TP53/APP/STAT3/VCP/HIF1A	5
GO:0006732	coenzyme metabolic process	7/55	403/18670	0.000172198	0.00103612	0.00041848	TP53/APP/PTGS2/SNCA/STAT3/VCP/HIF1A	7
GO:0022407	regulation of cell-cell adhesion	7/55	403/18670	0.000172198	0.00103612	0.00041848	TNF/ICAM1/CCL2/VEGFA/DPP4/CASP3/RELA	7
GO:0090050	positive regulation of cell migration involved in sprouting angiogenesis	3/55	37/18670	0.000175089	0.00104954	0.000423899	HMOX1/VEGFA/PTGS2	3
GO:2000142	regulation of DNA-templated transcription, initiation	3/55	37/18670	0.000175089	0.00104954	0.000423899	ESR1/TP53/JUN	3
GO:2001257	regulation of cation channel activity	5/55	178/18670	0.000176122	0.00105375	0.000425597	APP/NEFL/CCL2/DRD2/MMP9	5
GO:2001235	positive regulation of apoptotic signaling pathway	5/55	179/18670	0.00018078	0.00107958	0.000436032	SOD1/TP53/BCL2/MMP9/BCL2L1	5
GO:0021700	developmental maturation	6/55	284/18670	0.000182245	0.00108629	0.000438741	APP/NEFL/MMP2/BCL2/VEGFA/HIF1A	6
GO:0030705	cytoskeleton-dependent intracellular transport	5/55	180/18670	0.000185531	0.00109687	0.000443013	SOD1/APP/NEFL/NEFH/HIF1A	5
GO:0043534	blood vessel endothelial cell migration	5/55	180/18670	0.000185531	0.00109687	0.000443013	HMOX1/VEGFA/NOS3/PTGS2/HIF1A	5
GO:0071346	cellular response to interferon-gamma	5/55	180/18670	0.000185531	0.00109687	0.000443013	TP53/EDN1/ICAM1/CCL3/CCL2	5
GO:0050808	synapse organization	7/55	408/18670	0.000185732	0.00109687	0.000443013	TNF/APP/NEFL/NEFH/DRD2/SNCA/VCP	7
GO:0034976	response to endoplasmic reticulum stress	6/55	285/18670	0.000185746	0.00109687	0.000443013	TP53/JUN/BCL2/CCL2/VCP/BCL2L1	6
GO:0051590	positive regulation of neurotransmitter transport	3/55	38/18670	0.0001897	0.00111306	0.000449552	DRD2/CNR1/SNCA	3
GO:0071867	response to monoamine	3/55	38/18670	0.0001897	0.00111306	0.000449552	APP/MAPK1/SNCA	3
GO:0071869	response to catecholamine	3/55	38/18670	0.0001897	0.00111306	0.000449552	APP/MAPK1/SNCA	3
GO:0051591	response to cAMP	4/55	97/18670	0.00019059	0.00111306	0.000449552	COL1A1/APP/JUN/RELA	4
GO:1990868	response to chemokine	4/55	97/18670	0.00019059	0.00111306	0.000449552	EDN1/CCL3/CCL2/HIF1A	4
GO:1990869	cellular response to chemokine	4/55	97/18670	0.00019059	0.00111306	0.000449552	EDN1/CCL3/CCL2/HIF1A	4
GO:0009166	nucleotide catabolic process	5/55	182/18670	0.00019532	0.00113651	0.000459024	TP53/APP/STAT3/VCP/HIF1A	5
GO:0010821	regulation of mitochondrion organization	5/55	182/18670	0.00019532	0.00113651	0.000459024	TP53/BCL2/MMP9/BCL2L1/HIF1A	5
GO:0007162	negative regulation of cell adhesion	6/55	289/18670	0.000200285	0.00115735	0.000467444	COL1A1/SERPINE1/VEGFA/MUC1/MMP12/CASP3	6
GO:0009127	purine nucleoside monophosphate biosynthetic process	5/55	183/18670	0.00020036	0.00115735	0.000467444	TP53/APP/STAT3/VCP/HIF1A	5
GO:0009168	purine ribonucleoside monophosphate biosynthetic process	5/55	183/18670	0.00020036	0.00115735	0.000467444	TP53/APP/STAT3/VCP/HIF1A	5
GO:0038061	NIK/NF-kappaB signaling	5/55	183/18670	0.00020036	0.00115735	0.000467444	TNF/APP/EDN1/NFKBIA/RELA	5
GO:1902229	regulation of intrinsic apoptotic signaling pathway in response to DNA damage	3/55	39/18670	0.000205081	0.00118033	0.000476723	BCL2/MUC1/BCL2L1	3
GO:2000648	positive regulation of stem cell proliferation	3/55	39/18670	0.000205081	0.00118033	0.000476723	DRD2/VEGFA/HIF1A	3
GO:0048639	positive regulation of developmental growth	5/55	184/18670	0.000205499	0.0011806	0.000476831	EDN1/BCL2/DRD2/VEGFA/MAPK1	5
GO:0007200	phospholipase C-activating G protein-coupled receptor signaling pathway	4/55	100/18670	0.000214289	0.00122887	0.00049633	F2/ESR1/EDN1/DRD2	4
GO:0009260	ribonucleotide biosynthetic process	6/55	293/18670	0.00021571	0.00123479	0.00049872	TP53/APP/SNCA/STAT3/VCP/HIF1A	6
GO:0014046	dopamine secretion	3/55	40/18670	0.000221247	0.00126124	0.0005094	DRD2/CNR1/SNCA	3
GO:0014059	regulation of dopamine secretion	3/55	40/18670	0.000221247	0.00126124	0.0005094	DRD2/CNR1/SNCA	3
GO:0048167	regulation of synaptic plasticity	5/55	187/18670	0.00022152	0.00126124	0.0005094	APP/DRD2/MAPK1/PTGS2/SNCA	5
GO:0007631	feeding behavior	4/55	101/18670	0.00022264	0.00126535	0.00051106	APP/DRD2/CNR1/STAT3	4
GO:0050768	negative regulation of neurogenesis	6/55	295/18670	0.000223766	0.00126947	0.000512727	F2/TNF/TP53/APP/NGFR/STAT3	6
GO:0009142	nucleoside triphosphate biosynthetic process	5/55	188/18670	0.000227067	0.00128361	0.000518438	TP53/APP/STAT3/VCP/HIF1A	5
GO:1901292	nucleoside phosphate catabolic process	5/55	188/18670	0.000227067	0.00128361	0.000518438	TP53/APP/STAT3/VCP/HIF1A	5
GO:0032386	regulation of intracellular transport	7/55	423/18670	0.000231594	0.00130688	0.000527835	TP53/HMOX1/NEFH/DRD2/CNR1/MAPK1/PTGS2	7
GO:0090068	positive regulation of cell cycle process	6/55	298/18670	0.000236294	0.00133104	0.000537593	TP53/APP/EDN1/EDN3/DRD2/MUC1	6
GO:0061028	establishment of endothelial barrier	3/55	41/18670	0.000238217	0.0013395	0.00054101	TNF/ICAM1/VEGFA	3
GO:0046390	ribose phosphate biosynthetic process	6/55	300/18670	0.000244949	0.00137492	0.000555316	TP53/APP/SNCA/STAT3/VCP/HIF1A	6
GO:0048568	embryonic organ development	7/55	428/18670	0.00024877	0.00139085	0.000561751	SOD1/TNF/TP53/EDN1/VEGFA/MAPK1/HIF1A	7
GO:0030593	neutrophil chemotaxis	4/55	104/18670	0.000249101	0.00139085	0.000561751	EDN1/CCL3/CCL2/EDN3	4
GO:0071887	leukocyte apoptotic process	4/55	104/18670	0.000249101	0.00139085	0.000561751	TP53/CASP3/CASP9/HIF1A	4
GO:0050731	positive regulation of peptidyl-tyrosine phosphorylation	5/55	192/18670	0.000250318	0.0013952	0.000563505	TNF/TP53/ICAM1/VEGFA/STAT3	5
GO:0033003	regulation of mast cell activation	3/55	42/18670	0.000256008	0.00142441	0.000575304	HMOX1/CNR1/CNR2	3
GO:1903037	regulation of leukocyte cell-cell adhesion	6/55	304/18670	0.000263009	0.0014608	0.000590004	TNF/ICAM1/CCL2/DPP4/CASP3/RELA	6
GO:0046034	ATP metabolic process	6/55	305/18670	0.000267684	0.00148417	0.000599443	TP53/APP/SNCA/STAT3/VCP/HIF1A	6
GO:0006692	prostanoid metabolic process	3/55	43/18670	0.000274636	0.00151216	0.000610747	EDN1/PTGS1/PTGS2	3
GO:0006693	prostaglandin metabolic process	3/55	43/18670	0.000274636	0.00151216	0.000610747	EDN1/PTGS1/PTGS2	3
GO:0008631	intrinsic apoptotic signaling pathway in response to oxidative stress	3/55	43/18670	0.000274636	0.00151216	0.000610747	SOD1/BCL2/HIF1A	3
GO:1904646	cellular response to amyloid-beta	3/55	43/18670	0.000274636	0.00151216	0.000610747	APP/ICAM1/NGFR	3
GO:0009156	ribonucleoside monophosphate biosynthetic process	5/55	197/18670	0.000281882	0.00154885	0.000625564	TP53/APP/STAT3/VCP/HIF1A	5
GO:0060249	anatomical structure homeostasis	7/55	437/18670	0.000282274	0.00154885	0.000625564	SOD1/BCL2/VEGFA/CNR1/MAPK1/NOS3/HIF1A	7
GO:0015696	ammonium transport	4/55	108/18670	0.000287809	0.00157238	0.000635069	EDN1/DRD2/CNR1/SNCA	4
GO:0046916	cellular transition metal ion homeostasis	4/55	108/18670	0.000287809	0.00157238	0.000635069	SOD1/APP/HMOX1/HIF1A	4
GO:0007626	locomotory behavior	5/55	198/18670	0.000288542	0.00157238	0.000635069	SOD1/APP/DRD2/DPP4/SNCA	5
GO:0031099	regeneration	5/55	198/18670	0.000288542	0.00157238	0.000635069	JUN/NEFL/F7/HMOX1/BCL2	5
GO:0019932	second-messenger-mediated signaling	7/55	439/18670	0.000290191	0.00157866	0.000637605	TNF/EDN1/CCL3/EDN3/DRD2/VEGFA/NOS3	7
GO:0030225	macrophage differentiation	3/55	44/18670	0.000294118	0.00159184	0.000642929	APP/MMP9/VEGFA	3
GO:0042987	amyloid precursor protein catabolic process	3/55	44/18670	0.000294118	0.00159184	0.000642929	TNF/APP/CASP3	3
GO:0061756	leukocyte adhesion to vascular endothelial cell	3/55	44/18670	0.000294118	0.00159184	0.000642929	TNF/ICAM1/RELA	3
GO:0033559	unsaturated fatty acid metabolic process	4/55	110/18670	0.000308701	0.00166793	0.00067366	EDN1/PTGS1/CYP2C19/PTGS2	4
GO:0042771	intrinsic apoptotic signaling pathway in response to DNA damage by p53 class mediator	3/55	45/18670	0.00031447	0.00169048	0.000682767	TP53/BCL2/MUC1	3
GO:0048538	thymus development	3/55	45/18670	0.00031447	0.00169048	0.000682767	SOD1/BCL2/MAPK1	3
GO:0051932	synaptic transmission, GABAergic	3/55	45/18670	0.00031447	0.00169048	0.000682767	DRD2/CNR1/CNR2	3
GO:0051961	negative regulation of nervous system development	6/55	315/18670	0.000318128	0.00170725	0.000689542	F2/TNF/TP53/APP/NGFR/STAT3	6
GO:0072676	lymphocyte migration	4/55	111/18670	0.000319545	0.00171196	0.000691444	APP/ICAM1/CCL3/CCL2	4
GO:0030278	regulation of ossification	5/55	203/18670	0.000323653	0.00173105	0.000699155	TNF/CCL3/BCL2/MAPK1/HIF1A	5
GO:0042303	molting cycle	4/55	112/18670	0.000330659	0.00175582	0.00070916	TNF/BCL2/PTGS2/RELA	4
GO:0042633	hair cycle	4/55	112/18670	0.000330659	0.00175582	0.00070916	TNF/BCL2/PTGS2/RELA	4
GO:0051817	modification of morphology or physiology of other organism involved in symbiotic interaction	4/55	112/18670	0.000330659	0.00175582	0.00070916	F2/JUN/CCL3/BCL2L1	4
GO:0034764	positive regulation of transmembrane transport	5/55	204/18670	0.000331048	0.00175582	0.00070916	F2/ABCB1/CCL2/EDN3/SNCA	5
GO:0035265	organ growth	5/55	204/18670	0.000331048	0.00175582	0.00070916	SOD1/ESR1/EDN1/BCL2/MAPK1	5
GO:0002437	inflammatory response to antigenic stimulus	3/55	46/18670	0.00033571	0.00176581	0.000713194	TNF/ICAM1/CNR1	3
GO:0022602	ovulation cycle process	3/55	46/18670	0.00033571	0.00176581	0.000713194	ESR1/NOS3/CASP3	3
GO:0045776	negative regulation of blood pressure	3/55	46/18670	0.00033571	0.00176581	0.000713194	DRD2/CNR1/NOS3	3
GO:1903587	regulation of blood vessel endothelial cell proliferation involved in sprouting angiogenesis	3/55	46/18670	0.00033571	0.00176581	0.000713194	NGFR/HMOX1/VEGFA	3
GO:1904036	negative regulation of epithelial cell apoptotic process	3/55	46/18670	0.00033571	0.00176581	0.000713194	SERPINE1/ICAM1/HMOX1	3
GO:0006109	regulation of carbohydrate metabolic process	5/55	206/18670	0.000346221	0.00181809	0.000734308	TP53/APP/SNCA/STAT3/HIF1A	5
GO:0006690	icosanoid metabolic process	4/55	114/18670	0.000353716	0.00184978	0.000747106	EDN1/PTGS1/CYP2C19/PTGS2	4
GO:0030218	erythrocyte differentiation	4/55	114/18670	0.000353716	0.00184978	0.000747106	VEGFA/STAT3/CASP3/HIF1A	4
GO:0030073	insulin secretion	5/55	207/18670	0.000354002	0.00184978	0.000747106	TNF/DRD2/CNR1/DPP4/HIF1A	5
GO:0050435	amyloid-beta metabolic process	3/55	47/18670	0.000357854	0.00186377	0.000752758	TNF/APP/CASP3	3
GO:2001239	regulation of extrinsic apoptotic signaling pathway in absence of ligand	3/55	47/18670	0.000357854	0.00186377	0.000752758	TNF/BCL2/BCL2L1	3
GO:0009124	nucleoside monophosphate biosynthetic process	5/55	208/18670	0.000361915	0.00187877	0.000758815	TP53/APP/STAT3/VCP/HIF1A	5
GO:0090276	regulation of peptide hormone secretion	5/55	208/18670	0.000361915	0.00187877	0.000758815	TNF/DRD2/CNR1/DPP4/HIF1A	5
GO:0006096	glycolytic process	4/55	115/18670	0.000365666	0.00189514	0.000765428	TP53/APP/STAT3/HIF1A	4
GO:0032025	response to cobalt ion	2/55	10/18670	0.000377682	0.00193644	0.00078211	CASP3/CASP9	2
GO:0051918	negative regulation of fibrinolysis	2/55	10/18670	0.000377682	0.00193644	0.00078211	F2/SERPINE1	2
GO:0060346	bone trabecula formation	2/55	10/18670	0.000377682	0.00193644	0.00078211	COL1A1/MMP2	2
GO:0070099	regulation of chemokine-mediated signaling pathway	2/55	10/18670	0.000377682	0.00193644	0.00078211	EDN1/HIF1A	2
GO:1903799	negative regulation of production of miRNAs involved in gene silencing by miRNA	2/55	10/18670	0.000377682	0.00193644	0.00078211	ESR1/TP53	2
GO:0006757	ATP generation from ADP	4/55	116/18670	0.000377902	0.00193644	0.00078211	TP53/APP/STAT3/HIF1A	4
GO:1900180	regulation of protein localization to nucleus	4/55	116/18670	0.000377902	0.00193644	0.00078211	F2/NGFR/MAPK1/PTGS2	4
GO:0008038	neuron recognition	3/55	48/18670	0.000380916	0.00193938	0.000783295	APP/CNR1/CASP3	3
GO:0008542	visual learning	3/55	48/18670	0.000380916	0.00193938	0.000783295	APP/DRD2/HIF1A	3
GO:0060324	face development	3/55	48/18670	0.000380916	0.00193938	0.000783295	COL1A1/MMP2/MAPK1	3
GO:0090199	regulation of release of cytochrome c from mitochondria	3/55	48/18670	0.000380916	0.00193938	0.000783295	TP53/MMP9/BCL2L1	3
GO:0010822	positive regulation of mitochondrion organization	4/55	117/18670	0.000390429	0.00198463	0.000801571	TP53/BCL2/MMP9/HIF1A	4
GO:0016485	protein processing	6/55	328/18670	0.000394558	0.00199734	0.000806705	F2/PLAU/SERPINE1/F7/CASP3/ECE1	6
GO:0019058	viral life cycle	6/55	328/18670	0.000394558	0.00199734	0.000806705	TNF/ICAM1/BCL2/CCL2/DPP4/VCP	6
GO:0046394	carboxylic acid biosynthetic process	7/55	462/18670	0.000394816	0.00199734	0.000806705	TP53/APP/EDN1/PTGS1/PTGS2/STAT3/HIF1A	7
GO:0016053	organic acid biosynthetic process	7/55	463/18670	0.000399971	0.0020202	0.00081594	TP53/APP/EDN1/PTGS1/PTGS2/STAT3/HIF1A	7
GO:1990266	neutrophil migration	4/55	118/18670	0.00040325	0.00203353	0.000821322	EDN1/CCL3/CCL2/EDN3	4
GO:0071715	icosanoid transport	3/55	49/18670	0.000404915	0.00203547	0.000822104	EDN1/DRD2/ABCC2	3
GO:1901571	fatty acid derivative transport	3/55	49/18670	0.000404915	0.00203547	0.000822104	EDN1/DRD2/ABCC2	3
GO:0051235	maintenance of location	6/55	330/18670	0.000407492	0.00204518	0.000826029	F2/TNF/CCL3/DRD2/NFKBIA/SNCA	6
GO:2001020	regulation of response to DNA damage stimulus	5/55	214/18670	0.000412246	0.00206578	0.000834348	TP53/BCL2/MUC1/CASP9/BCL2L1	5
GO:0071214	cellular response to abiotic stimulus	6/55	331/18670	0.000414082	0.00206846	0.000835429	COL1A1/TP53/PTGS2/CASP3/CASP9/BCL2L1	6
GO:0104004	cellular response to environmental stimulus	6/55	331/18670	0.000414082	0.00206846	0.000835429	COL1A1/TP53/PTGS2/CASP3/CASP9/BCL2L1	6
GO:0042866	pyruvate biosynthetic process	4/55	119/18670	0.000416369	0.00207662	0.000838724	TP53/APP/STAT3/HIF1A	4
GO:0001961	positive regulation of cytokine-mediated signaling pathway	3/55	50/18670	0.000429865	0.00213387	0.00086185	EDN1/MMP12/HIF1A	3
GO:0002931	response to ischemia	3/55	50/18670	0.000429865	0.00213387	0.00086185	TP53/BCL2/CASP9	3
GO:0045104	intermediate filament cytoskeleton organization	3/55	50/18670	0.000429865	0.00213387	0.00086185	SOD1/NEFL/NEFH	3
GO:0030336	negative regulation of cell migration	6/55	334/18670	0.000434356	0.00215281	0.000869497	SERPINE1/HMOX1/BCL2/CCL2/DRD2/STAT3	6
GO:0009205	purine ribonucleoside triphosphate metabolic process	6/55	335/18670	0.000441284	0.00218374	0.000881989	TP53/APP/SNCA/STAT3/VCP/HIF1A	6
GO:0050807	regulation of synapse organization	5/55	218/18670	0.000448625	0.00220779	0.000891705	TNF/APP/DRD2/SNCA/VCP	5
GO:1903039	positive regulation of leukocyte cell-cell adhesion	5/55	218/18670	0.000448625	0.00220779	0.000891705	TNF/ICAM1/CCL2/DPP4/RELA	5
GO:0050708	regulation of protein secretion	7/55	472/18670	0.000448849	0.00220779	0.000891705	TNF/CCL3/DRD2/CNR1/DPP4/MMP12/HIF1A	7
GO:0007159	leukocyte cell-cell adhesion	6/55	337/18670	0.000455398	0.00220779	0.000891705	TNF/ICAM1/CCL2/DPP4/CASP3/RELA	6
GO:0043405	regulation of MAP kinase activity	6/55	337/18670	0.000455398	0.00220779	0.000891705	SOD1/TNF/EDN1/EDN3/VEGFA/MAPK1	6
GO:0019369	arachidonic acid metabolic process	3/55	51/18670	0.000455781	0.00220779	0.000891705	PTGS1/CYP2C19/PTGS2	3
GO:0031103	axon regeneration	3/55	51/18670	0.000455781	0.00220779	0.000891705	JUN/NEFL/BCL2	3
GO:0045103	intermediate filament-based process	3/55	51/18670	0.000455781	0.00220779	0.000891705	SOD1/NEFL/NEFH	3
GO:0048260	positive regulation of receptor-mediated endocytosis	3/55	51/18670	0.000455781	0.00220779	0.000891705	SERPINE1/DRD2/VEGFA	3
GO:0019079	viral genome replication	4/55	122/18670	0.000457556	0.00220779	0.000891705	TNF/BCL2/CCL2/VCP	4
GO:0043583	ear development	5/55	219/18670	0.000458087	0.00220779	0.000891705	SOD1/EDN1/BCL2/MAPK1/ECE1	5
GO:0014820	tonic smooth muscle contraction	2/55	11/18670	0.000460739	0.00220779	0.000891705	EDN1/EDNRA	2
GO:0019371	cyclooxygenase pathway	2/55	11/18670	0.000460739	0.00220779	0.000891705	PTGS1/PTGS2	2
GO:0033629	negative regulation of cell adhesion mediated by integrin	2/55	11/18670	0.000460739	0.00220779	0.000891705	SERPINE1/MUC1	2
GO:0035747	natural killer cell chemotaxis	2/55	11/18670	0.000460739	0.00220779	0.000891705	CCL3/CCL2	2
GO:0043619	regulation of transcription from RNA polymerase II promoter in response to oxidative stress	2/55	11/18670	0.000460739	0.00220779	0.000891705	HMOX1/HIF1A	2
GO:0045899	positive regulation of RNA polymerase II transcriptional preinitiation complex assembly	2/55	11/18670	0.000460739	0.00220779	0.000891705	ESR1/TP53	2
GO:0046886	positive regulation of hormone biosynthetic process	2/55	11/18670	0.000460739	0.00220779	0.000891705	TNF/HIF1A	2
GO:0051583	dopamine uptake involved in synaptic transmission	2/55	11/18670	0.000460739	0.00220779	0.000891705	DRD2/SNCA	2
GO:0051934	catecholamine uptake involved in synaptic transmission	2/55	11/18670	0.000460739	0.00220779	0.000891705	DRD2/SNCA	2
GO:0072683	T cell extravasation	2/55	11/18670	0.000460739	0.00220779	0.000891705	ICAM1/CCL2	2
GO:0045930	negative regulation of mitotic cell cycle	6/55	338/18670	0.000462587	0.00221331	0.000893934	TNF/TP53/BCL2/CCL2/MUC1/BCL2L1	6
GO:1903706	regulation of hemopoiesis	7/55	475/18670	0.000466165	0.00222708	0.000899494	SOD1/TNF/JUN/CCL3/NFKBIA/STAT3/HIF1A	7
GO:0051928	positive regulation of calcium ion transport	4/55	123/18670	0.000471909	0.00224776	0.000907846	F2/CCL3/CCL2/SNCA	4
GO:0071621	granulocyte chemotaxis	4/55	123/18670	0.000471909	0.00224776	0.000907846	EDN1/CCL3/CCL2/EDN3	4
GO:0009167	purine ribonucleoside monophosphate metabolic process	6/55	340/18670	0.00047723	0.0022697	0.000916708	TP53/APP/SNCA/STAT3/VCP/HIF1A	6
GO:0015872	dopamine transport	3/55	52/18670	0.000482681	0.0022834	0.000922243	DRD2/CNR1/SNCA	3
GO:0048168	regulation of neuronal synaptic plasticity	3/55	52/18670	0.000482681	0.0022834	0.000922243	APP/DRD2/SNCA	3
GO:2000179	positive regulation of neural precursor cell proliferation	3/55	52/18670	0.000482681	0.0022834	0.000922243	DRD2/VEGFA/HIF1A	3
GO:0009126	purine nucleoside monophosphate metabolic process	6/55	341/18670	0.000484686	0.0022834	0.000922243	TP53/APP/SNCA/STAT3/VCP/HIF1A	6
GO:0009199	ribonucleoside triphosphate metabolic process	6/55	341/18670	0.000484686	0.0022834	0.000922243	TP53/APP/SNCA/STAT3/VCP/HIF1A	6
GO:0014013	regulation of gliogenesis	4/55	124/18670	0.00048658	0.0022834	0.000922243	F2/TNF/CCL3/RELA	4
GO:0046717	acid secretion	4/55	124/18670	0.00048658	0.0022834	0.000922243	EDN1/DRD2/SNCA/ABCC2	4
GO:0051101	regulation of DNA binding	4/55	124/18670	0.00048658	0.0022834	0.000922243	JUN/HMOX1/MMP9/NFKBIA	4
GO:0051209	release of sequestered calcium ion into cytosol	4/55	124/18670	0.00048658	0.0022834	0.000922243	F2/CCL3/DRD2/SNCA	4
GO:0009144	purine nucleoside triphosphate metabolic process	6/55	342/18670	0.000492233	0.00230652	0.000931582	TP53/APP/SNCA/STAT3/VCP/HIF1A	6
GO:0006913	nucleocytoplasmic transport	6/55	343/18670	0.000499871	0.00233887	0.000944644	TP53/NFKBIA/MAPK1/PTGS2/MMP12/STAT3	6
GO:2000134	negative regulation of G1/S transition of mitotic cell cycle	4/55	125/18670	0.000501573	0.00234338	0.000946466	TP53/BCL2/CCL2/MUC1	4
GO:0002043	blood vessel endothelial cell proliferation involved in sprouting angiogenesis	3/55	53/18670	0.000510578	0.00237845	0.000960633	NGFR/HMOX1/VEGFA	3
GO:0007632	visual behavior	3/55	53/18670	0.000510578	0.00237845	0.000960633	APP/DRD2/HIF1A	3
GO:0046031	ADP metabolic process	4/55	126/18670	0.000516892	0.00240083	0.00096967	TP53/APP/STAT3/HIF1A	4
GO:0051283	negative regulation of sequestering of calcium ion	4/55	126/18670	0.000516892	0.00240083	0.00096967	F2/CCL3/DRD2/SNCA	4
GO:0007160	cell-matrix adhesion	5/55	225/18670	0.000518061	0.00240274	0.000970444	PLAU/SERPINE1/BCL2/VEGFA/MMP12	5
GO:0022604	regulation of cell morphogenesis	7/55	484/18670	0.000521348	0.00241446	0.000975177	F2/ICAM1/NEFL/NGFR/CCL3/CCL2/VEGFA	7
GO:0051169	nuclear transport	6/55	346/18670	0.000523343	0.00242017	0.000977483	TP53/NFKBIA/MAPK1/PTGS2/MMP12/STAT3	6
GO:0034404	nucleobase-containing small molecule biosynthetic process	5/55	226/18670	0.000528605	0.00244096	0.000985878	TP53/APP/STAT3/VCP/HIF1A	5
GO:0050803	regulation of synapse structure or activity	5/55	227/18670	0.00053931	0.00248039	0.00100181	TNF/APP/DRD2/SNCA/VCP	5
GO:0006636	unsaturated fatty acid biosynthetic process	3/55	54/18670	0.000539488	0.00248039	0.00100181	EDN1/PTGS1/PTGS2	3
GO:0043392	negative regulation of DNA binding	3/55	54/18670	0.000539488	0.00248039	0.00100181	JUN/HMOX1/NFKBIA	3
GO:2000146	negative regulation of cell motility	6/55	349/18670	0.000547666	0.00251105	0.00101419	SERPINE1/HMOX1/BCL2/CCL2/DRD2/STAT3	6
GO:0002576	platelet degranulation	4/55	128/18670	0.000548527	0.00251105	0.00101419	SOD1/APP/SERPINE1/VEGFA	4
GO:0051282	regulation of sequestering of calcium ion	4/55	128/18670	0.000548527	0.00251105	0.00101419	F2/CCL3/DRD2/SNCA	4
GO:0002863	positive regulation of inflammatory response to antigenic stimulus	2/55	12/18670	0.000551842	0.00251535	0.00101593	TNF/CNR1	2
GO:0043922	negative regulation by host of viral transcription	2/55	12/18670	0.000551842	0.00251535	0.00101593	JUN/CCL3	2
GO:0070243	regulation of thymocyte apoptotic process	2/55	12/18670	0.000551842	0.00251535	0.00101593	TP53/HIF1A	2
GO:0034754	cellular hormone metabolic process	4/55	129/18670	0.00056485	0.00257096	0.00103838	ADH1C/TTR/ESR1/ECE1	4
GO:0042220	response to cocaine	3/55	55/18670	0.000569426	0.00258069	0.00104232	DRD2/CNR1/SNCA	3
GO:0046456	icosanoid biosynthetic process	3/55	55/18670	0.000569426	0.00258069	0.00104232	EDN1/PTGS1/PTGS2	3
GO:0048016	inositol phosphate-mediated signaling	3/55	55/18670	0.000569426	0.00258069	0.00104232	TNF/EDN1/EDN3	3
GO:0009161	ribonucleoside monophosphate metabolic process	6/55	354/18670	0.000590154	0.00266703	0.00107719	TP53/APP/SNCA/STAT3/VCP/HIF1A	6
GO:0031589	cell-substrate adhesion	6/55	354/18670	0.000590154	0.00266703	0.00107719	PLAU/COL1A1/SERPINE1/BCL2/VEGFA/MMP12	6
GO:0046887	positive regulation of hormone secretion	4/55	131/18670	0.000598529	0.00268957	0.00108629	EDN1/EDN3/DRD2/HIF1A	4
GO:0051208	sequestering of calcium ion	4/55	131/18670	0.000598529	0.00268957	0.00108629	F2/CCL3/DRD2/SNCA	4
GO:0055076	transition metal ion homeostasis	4/55	131/18670	0.000598529	0.00268957	0.00108629	SOD1/APP/HMOX1/HIF1A	4
GO:1902807	negative regulation of cell cycle G1/S phase transition	4/55	131/18670	0.000598529	0.00268957	0.00108629	TP53/BCL2/CCL2/MUC1	4
GO:0010332	response to gamma radiation	3/55	56/18670	0.000600407	0.0026904	0.00108662	TP53/BCL2/BCL2L1	3
GO:0060688	regulation of morphogenesis of a branching structure	3/55	56/18670	0.000600407	0.0026904	0.00108662	TNF/ESR1/VEGFA	3
GO:0002791	regulation of peptide secretion	7/55	500/18670	0.000632268	0.00282202	0.00113979	TNF/CCL3/DRD2/CNR1/DPP4/MMP12/HIF1A	7
GO:0048008	platelet-derived growth factor receptor signaling pathway	3/55	57/18670	0.000632446	0.00282202	0.00113979	F7/VEGFA/SNCA	3
GO:0060760	positive regulation of response to cytokine stimulus	3/55	57/18670	0.000632446	0.00282202	0.00113979	EDN1/MMP12/HIF1A	3
GO:0006936	muscle contraction	6/55	360/18670	0.000644483	0.00285574	0.00115341	SOD1/EDN1/EDN3/DRD2/EDNRA/PTGS2	6
GO:0010870	positive regulation of receptor biosynthetic process	2/55	13/18670	0.000650945	0.00285574	0.00115341	EDN1/HIF1A	2
GO:0019896	axonal transport of mitochondrion	2/55	13/18670	0.000650945	0.00285574	0.00115341	NEFL/HIF1A	2
GO:0045759	negative regulation of action potential	2/55	13/18670	0.000650945	0.00285574	0.00115341	CNR1/CNR2	2
GO:0047484	regulation of response to osmotic stress	2/55	13/18670	0.000650945	0.00285574	0.00115341	ABCB1/PTGS2	2
GO:0051001	negative regulation of nitric-oxide synthase activity	2/55	13/18670	0.000650945	0.00285574	0.00115341	CNR1/CNR2	2
GO:0061430	bone trabecula morphogenesis	2/55	13/18670	0.000650945	0.00285574	0.00115341	COL1A1/MMP2	2
GO:0070431	nucleotide-binding oligomerization domain containing 2 signaling pathway	2/55	13/18670	0.000650945	0.00285574	0.00115341	NFKBIA/RELA	2
GO:0090399	replicative senescence	2/55	13/18670	0.000650945	0.00285574	0.00115341	TP53/SERPINE1	2
GO:0090594	inflammatory response to wounding	2/55	13/18670	0.000650945	0.00285574	0.00115341	HMOX1/HIF1A	2
GO:1901550	regulation of endothelial cell development	2/55	13/18670	0.000650945	0.00285574	0.00115341	TNF/VEGFA	2
GO:1903140	regulation of establishment of endothelial barrier	2/55	13/18670	0.000650945	0.00285574	0.00115341	TNF/VEGFA	2
GO:0006165	nucleoside diphosphate phosphorylation	4/55	134/18670	0.000651689	0.00285574	0.00115341	TP53/APP/STAT3/HIF1A	4
GO:0031331	positive regulation of cellular catabolic process	6/55	361/18670	0.000653903	0.00286088	0.00115548	TNF/APP/HMOX1/SNCA/VCP/HIF1A	6
GO:0032872	regulation of stress-activated MAPK cascade	5/55	237/18670	0.000655561	0.00286088	0.00115548	TNF/APP/EDN1/VEGFA/MAPK1	5
GO:0043122	regulation of I-kappaB kinase/NF-kappaB signaling	5/55	237/18670	0.000655561	0.00286088	0.00115548	TNF/ESR1/HMOX1/ATP2C1/RELA	5
GO:0009141	nucleoside triphosphate metabolic process	6/55	362/18670	0.000663431	0.00289125	0.00116775	TP53/APP/SNCA/STAT3/VCP/HIF1A	6
GO:0098930	axonal transport	3/55	58/18670	0.000665557	0.00289654	0.00116988	SOD1/NEFL/HIF1A	3
GO:0018108	peptidyl-tyrosine phosphorylation	6/55	363/18670	0.000673066	0.00292521	0.00118146	TNF/TP53/APP/ICAM1/VEGFA/STAT3	6
GO:0031348	negative regulation of defense response	5/55	239/18670	0.000680903	0.0029512	0.00119196	SOD1/F2/DRD2/CNR2/MMP12	5
GO:0070302	regulation of stress-activated protein kinase signaling cascade	5/55	239/18670	0.000680903	0.0029512	0.00119196	TNF/APP/EDN1/VEGFA/MAPK1	5
GO:0006066	alcohol metabolic process	6/55	364/18670	0.000682809	0.00295543	0.00119367	ADH1C/SOD1/TNF/TTR/APP/SNCA	6
GO:0046939	nucleotide phosphorylation	4/55	136/18670	0.000688937	0.00297789	0.00120274	TP53/APP/STAT3/HIF1A	4
GO:0001885	endothelial cell development	3/55	59/18670	0.000699755	0.00300828	0.00121501	TNF/ICAM1/VEGFA	3
GO:0031102	neuron projection regeneration	3/55	59/18670	0.000699755	0.00300828	0.00121501	JUN/NEFL/BCL2	3
GO:0033619	membrane protein proteolysis	3/55	59/18670	0.000699755	0.00300828	0.00121501	TNF/NGFR/RELA	3
GO:0097755	positive regulation of blood vessel diameter	3/55	59/18670	0.000699755	0.00300828	0.00121501	SOD1/HMOX1/NOS3	3
GO:0018212	peptidyl-tyrosine modification	6/55	366/18670	0.000702624	0.00301654	0.00121835	TNF/TP53/APP/ICAM1/VEGFA/STAT3	6
GO:0042593	glucose homeostasis	5/55	241/18670	0.000706973	0.00302377	0.00122127	ICAM1/NGFR/CNR1/STAT3/HIF1A	5
GO:0031644	regulation of neurological system process	4/55	137/18670	0.000708116	0.00302377	0.00122127	APP/EDN1/CCL3/NOS3	4
GO:0034605	cellular response to heat	4/55	137/18670	0.000708116	0.00302377	0.00122127	HMOX1/MAPK1/PTGS2/VCP	4
GO:1903670	regulation of sprouting angiogenesis	4/55	137/18670	0.000708116	0.00302377	0.00122127	NGFR/HMOX1/VEGFA/PTGS2	4
GO:0033500	carbohydrate homeostasis	5/55	242/18670	0.000720286	0.00307161	0.00124059	ICAM1/NGFR/CNR1/STAT3/HIF1A	5
GO:0008584	male gonad development	4/55	138/18670	0.000727671	0.00309065	0.00124828	ESR1/ICAM1/BCL2/BCL2L1	4
GO:0009135	purine nucleoside diphosphate metabolic process	4/55	138/18670	0.000727671	0.00309065	0.00124828	TP53/APP/STAT3/HIF1A	4
GO:0009179	purine ribonucleoside diphosphate metabolic process	4/55	138/18670	0.000727671	0.00309065	0.00124828	TP53/APP/STAT3/HIF1A	4
GO:0045576	mast cell activation	3/55	60/18670	0.000735054	0.00311784	0.00125927	HMOX1/CNR1/CNR2	3
GO:0046546	development of primary male sexual characteristics	4/55	139/18670	0.000747605	0.00316264	0.00127736	ESR1/ICAM1/BCL2/BCL2L1	4
GO:0050715	positive regulation of cytokine secretion	4/55	139/18670	0.000747605	0.00316264	0.00127736	TNF/CCL3/DRD2/MMP12	4
GO:0035810	positive regulation of urine volume	2/55	14/18670	0.000758001	0.00318963	0.00128826	EDN1/DRD2	2
GO:0035815	positive regulation of renal sodium excretion	2/55	14/18670	0.000758001	0.00318963	0.00128826	EDN1/DRD2	2
GO:0051917	regulation of fibrinolysis	2/55	14/18670	0.000758001	0.00318963	0.00128826	F2/SERPINE1	2
GO:0099188	postsynaptic cytoskeleton organization	2/55	14/18670	0.000758001	0.00318963	0.00128826	NEFL/NEFH	2
GO:0009185	ribonucleoside diphosphate metabolic process	4/55	140/18670	0.000767922	0.00321859	0.00129995	TP53/APP/STAT3/HIF1A	4
GO:0042737	drug catabolic process	4/55	140/18670	0.000767922	0.00321859	0.00129995	CYP2C19/SNCA/ECE1/HBA2	4
GO:0097553	calcium ion transmembrane import into cytosol	4/55	140/18670	0.000767922	0.00321859	0.00129995	F2/CCL3/DRD2/SNCA	4
GO:0006879	cellular iron ion homeostasis	3/55	61/18670	0.000771468	0.0032207	0.00130081	SOD1/HMOX1/HIF1A	3
GO:0045123	cellular extravasation	3/55	61/18670	0.000771468	0.0032207	0.00130081	TNF/ICAM1/CCL2	3
GO:0090303	positive regulation of wound healing	3/55	61/18670	0.000771468	0.0032207	0.00130081	F2/SERPINE1/F7	3
GO:0051098	regulation of binding	6/55	373/18670	0.000775518	0.00323336	0.00130592	APP/JUN/HMOX1/BCL2/MMP9/NFKBIA	6
GO:0097530	granulocyte migration	4/55	141/18670	0.000788628	0.00328371	0.00132626	EDN1/CCL3/CCL2/EDN3	4
GO:0009123	nucleoside monophosphate metabolic process	6/55	375/18670	0.000797384	0.00331582	0.00133923	TP53/APP/SNCA/STAT3/VCP/HIF1A	6
GO:0046434	organophosphate catabolic process	5/55	248/18670	0.000804145	0.00333957	0.00134882	TP53/APP/STAT3/VCP/HIF1A	5
GO:0002260	lymphocyte homeostasis	3/55	62/18670	0.000809011	0.0033423	0.00134992	BCL2/CASP3/HIF1A	3
GO:0046824	positive regulation of nucleocytoplasmic transport	3/55	62/18670	0.000809011	0.0033423	0.00134992	TP53/MAPK1/PTGS2	3
GO:0050433	regulation of catecholamine secretion	3/55	62/18670	0.000809011	0.0033423	0.00134992	DRD2/CNR1/SNCA	3
GO:0070059	intrinsic apoptotic signaling pathway in response to endoplasmic reticulum stress	3/55	62/18670	0.000809011	0.0033423	0.00134992	TP53/BCL2/BCL2L1	3
GO:0030879	mammary gland development	4/55	143/18670	0.000831219	0.0034207	0.00138159	ESR1/VEGFA/MAPK1/HIF1A	4
GO:0031056	regulation of histone modification	4/55	143/18670	0.000831219	0.0034207	0.00138159	TP53/VEGFA/MUC1/SNCA	4
GO:0044344	cellular response to fibroblast growth factor stimulus	4/55	143/18670	0.000831219	0.0034207	0.00138159	COL1A1/CCL2/MAPK1/SNCA	4
GO:0071383	cellular response to steroid hormone stimulus	5/55	250/18670	0.000833658	0.0034263	0.00138385	ESR1/EDN1/ICAM1/CASP9/ABCC2	5
GO:0007588	excretion	3/55	63/18670	0.000847697	0.00347053	0.00140171	EDN1/HMOX1/DRD2	3
GO:0042982	amyloid precursor protein metabolic process	3/55	63/18670	0.000847697	0.00347053	0.00140171	TNF/APP/CASP3	3
GO:2000401	regulation of lymphocyte migration	3/55	63/18670	0.000847697	0.00347053	0.00140171	APP/CCL3/CCL2	3
GO:1904064	positive regulation of cation transmembrane transport	4/55	144/18670	0.000853112	0.00348821	0.00140885	F2/CCL2/EDN3/SNCA	4
GO:0001921	positive regulation of receptor recycling	2/55	15/18670	0.000872965	0.00353301	0.00142695	SNCA/ECE1	2
GO:0030812	negative regulation of nucleotide catabolic process	2/55	15/18670	0.000872965	0.00353301	0.00142695	TP53/STAT3	2
GO:0032352	positive regulation of hormone metabolic process	2/55	15/18670	0.000872965	0.00353301	0.00142695	TNF/HIF1A	2
GO:0033604	negative regulation of catecholamine secretion	2/55	15/18670	0.000872965	0.00353301	0.00142695	DRD2/CNR1	2
GO:0045898	regulation of RNA polymerase II transcriptional preinitiation complex assembly	2/55	15/18670	0.000872965	0.00353301	0.00142695	ESR1/TP53	2
GO:0048070	regulation of developmental pigmentation	2/55	15/18670	0.000872965	0.00353301	0.00142695	BCL2/EDN3	2
GO:0051198	negative regulation of coenzyme metabolic process	2/55	15/18670	0.000872965	0.00353301	0.00142695	TP53/STAT3	2
GO:0090494	dopamine uptake	2/55	15/18670	0.000872965	0.00353301	0.00142695	DRD2/SNCA	2
GO:0007605	sensory perception of sound	4/55	145/18670	0.00087541	0.00353839	0.00142912	SOD1/COL1A1/ICAM1/CASP3	4
GO:2000027	regulation of animal organ morphogenesis	5/55	253/18670	0.000879435	0.00355015	0.00143387	TNF/ESR1/EDN1/BCL2/VEGFA	5
GO:0050432	catecholamine secretion	3/55	64/18670	0.00088754	0.00356926	0.00144159	DRD2/CNR1/SNCA	3
GO:1900449	regulation of glutamate receptor signaling pathway	3/55	64/18670	0.00088754	0.00356926	0.00144159	APP/NEFL/CCL2	3
GO:1903672	positive regulation of sprouting angiogenesis	3/55	64/18670	0.00088754	0.00356926	0.00144159	HMOX1/VEGFA/PTGS2	3
GO:0006631	fatty acid metabolic process	6/55	383/18670	0.000889668	0.00357329	0.00144322	EDN1/CNR1/PTGS1/CYP2C19/PTGS2/SNCA	6
GO:0051271	negative regulation of cellular component movement	6/55	384/18670	0.00090176	0.00361729	0.00146099	SERPINE1/HMOX1/BCL2/CCL2/DRD2/STAT3	6
GO:0022409	positive regulation of cell-cell adhesion	5/55	255/18670	0.000910979	0.00364966	0.00147406	TNF/ICAM1/CCL2/DPP4/RELA	5
GO:0061351	neural precursor cell proliferation	4/55	147/18670	0.000921235	0.0036861	0.00148878	TP53/DRD2/VEGFA/HIF1A	4
GO:0002548	monocyte chemotaxis	3/55	65/18670	0.000928553	0.00370605	0.00149683	SERPINE1/CCL3/CCL2	3
GO:0006940	regulation of smooth muscle contraction	3/55	65/18670	0.000928553	0.00370605	0.00149683	SOD1/EDN1/PTGS2	3
GO:0014065	phosphatidylinositol 3-kinase signaling	4/55	148/18670	0.00094477	0.00376604	0.00152107	F2/TNF/EDN1/MAPK1	4
GO:0045787	positive regulation of cell cycle	6/55	389/18670	0.00096414	0.00383844	0.00155031	TP53/APP/EDN1/EDN3/DRD2/MUC1	6
GO:0008277	regulation of G protein-coupled receptor signaling pathway	4/55	149/18670	0.000968726	0.00384225	0.00155185	F2/EDN1/DRD2/SNCA	4
GO:0009267	cellular response to starvation	4/55	149/18670	0.000968726	0.00384225	0.00155185	TP53/JUN/BCL2/MAPK1	4
GO:0048592	eye morphogenesis	4/55	149/18670	0.000968726	0.00384225	0.00155185	BCL2/VEGFA/STAT3/HIF1A	4
GO:0003007	heart morphogenesis	5/55	259/18670	0.000976591	0.00386862	0.00156249	TP53/JUN/VEGFA/NOS3/HIF1A	5
GO:0050777	negative regulation of immune response	4/55	150/18670	0.000993108	0.00391538	0.00158138	TNF/HMOX1/DRD2/MMP12	4
GO:0071774	response to fibroblast growth factor	4/55	150/18670	0.000993108	0.00391538	0.00158138	COL1A1/CCL2/MAPK1/SNCA	4
GO:0045986	negative regulation of smooth muscle contraction	2/55	16/18670	0.000995791	0.00391538	0.00158138	SOD1/PTGS2	2
GO:0060965	negative regulation of gene silencing by miRNA	2/55	16/18670	0.000995791	0.00391538	0.00158138	ESR1/TP53	2
GO:0090493	catecholamine uptake	2/55	16/18670	0.000995791	0.00391538	0.00158138	DRD2/SNCA	2
GO:1902166	negative regulation of intrinsic apoptotic signaling pathway in response to DNA damage by p53 class mediator	2/55	16/18670	0.000995791	0.00391538	0.00158138	BCL2/MUC1	2
GO:0015850	organic hydroxy compound transport	5/55	262/18670	0.00102806	0.00403728	0.00163062	DRD2/CNR1/NFKBIA/SNCA/ABCC2	5
GO:0001890	placenta development	4/55	152/18670	0.00104316	0.00409151	0.00165252	SOD1/MAPK1/PTGS2/HIF1A	4
GO:0040013	negative regulation of locomotion	6/55	396/18670	0.00105701	0.00413732	0.00167102	SERPINE1/HMOX1/BCL2/CCL2/DRD2/STAT3	6
GO:0010812	negative regulation of cell-substrate adhesion	3/55	68/18670	0.00105875	0.00413732	0.00167102	COL1A1/SERPINE1/MMP12	3
GO:0050918	positive chemotaxis	3/55	68/18670	0.00105875	0.00413732	0.00167102	F7/CCL3/VEGFA	3
GO:0030168	platelet activation	4/55	153/18670	0.00106884	0.00416652	0.00168281	F2/COL1A1/MAPK1/NOS3	4
GO:0034250	positive regulation of cellular amide metabolic process	4/55	153/18670	0.00106884	0.00416652	0.00168281	TNF/APP/MAPK1/CASP3	4
GO:0051604	protein maturation	6/55	397/18670	0.00107082	0.00416911	0.00168386	F2/PLAU/SERPINE1/F7/CASP3/ECE1	6
GO:0006090	pyruvate metabolic process	4/55	154/18670	0.00109496	0.00425269	0.00171762	TP53/APP/STAT3/HIF1A	4
GO:0055067	monovalent inorganic cation homeostasis	4/55	154/18670	0.00109496	0.00425269	0.00171762	EDN1/BCL2/DRD2/MAPK1	4
GO:0042698	ovulation cycle	3/55	69/18670	0.00110458	0.00428478	0.00173058	ESR1/NOS3/CASP3	3
GO:0010876	lipid localization	6/55	400/18670	0.00111309	0.00431253	0.00174179	TNF/EDN1/ABCB1/DRD2/NFKBIA/ABCC2	6
GO:0006089	lactate metabolic process	2/55	17/18670	0.00112643	0.00433254	0.00174987	TP53/HIF1A	2
GO:0006978	DNA damage response, signal transduction by p53 class mediator resulting in transcription of p21 class mediator	2/55	17/18670	0.00112643	0.00433254	0.00174987	TP53/MUC1	2
GO:0010224	response to UV-B	2/55	17/18670	0.00112643	0.00433254	0.00174987	BCL2/RELA	2
GO:0015732	prostaglandin transport	2/55	17/18670	0.00112643	0.00433254	0.00174987	EDN1/ABCC2	2
GO:0050665	hydrogen peroxide biosynthetic process	2/55	17/18670	0.00112643	0.00433254	0.00174987	SOD1/STAT3	2
GO:0070242	thymocyte apoptotic process	2/55	17/18670	0.00112643	0.00433254	0.00174987	TP53/HIF1A	2
GO:0050714	positive regulation of protein secretion	5/55	268/18670	0.00113704	0.00436804	0.00176421	TNF/CCL3/DRD2/MMP12/HIF1A	5
GO:0007259	JAK-STAT cascade	4/55	156/18670	0.00114855	0.00439755	0.00177612	F2/TNF/CCL2/STAT3	4
GO:0030856	regulation of epithelial cell differentiation	4/55	156/18670	0.00114855	0.00439755	0.00177612	TNF/SERPINE1/MMP9/VEGFA	4
GO:0010517	regulation of phospholipase activity	3/55	70/18670	0.00115164	0.00439755	0.00177612	ESR1/EDNRA/SNCA	3
GO:0033077	T cell differentiation in thymus	3/55	70/18670	0.00115164	0.00439755	0.00177612	SOD1/TP53/BCL2	3
GO:0050766	positive regulation of phagocytosis	3/55	70/18670	0.00115164	0.00439755	0.00177612	SOD1/TNF/CCL2	3
GO:0045785	positive regulation of cell adhesion	6/55	403/18670	0.00115663	0.00441129	0.00178168	TNF/ICAM1/CCL2/VEGFA/DPP4/RELA	6
GO:0043900	regulation of multi-organism process	6/55	405/18670	0.00118637	0.00451932	0.00182531	TNF/JUN/CCL3/BCL2/CNR1/MMP12	6
GO:0009132	nucleoside diphosphate metabolic process	4/55	158/18670	0.00120395	0.00458078	0.00185013	TP53/APP/STAT3/HIF1A	4
GO:0002673	regulation of acute inflammatory response	4/55	159/18670	0.00123234	0.00468319	0.00189149	F2/TNF/CNR1/PTGS2	4
GO:0061180	mammary gland epithelium development	3/55	72/18670	0.00124952	0.00474282	0.00191558	ESR1/MAPK1/HIF1A	3
GO:0046661	male sex differentiation	4/55	160/18670	0.0012612	0.0047499	0.00191844	ESR1/ICAM1/BCL2/BCL2L1	4
GO:0019216	regulation of lipid metabolic process	6/55	410/18670	0.00126332	0.0047499	0.00191844	SOD1/F2/TNF/CNR1/PTGS2/SNCA	6
GO:0008090	retrograde axonal transport	2/55	18/18670	0.00126485	0.0047499	0.00191844	SOD1/NEFL	2
GO:0031065	positive regulation of histone deacetylation	2/55	18/18670	0.00126485	0.0047499	0.00191844	TP53/VEGFA	2
GO:0031293	membrane protein intracellular domain proteolysis	2/55	18/18670	0.00126485	0.0047499	0.00191844	NGFR/RELA	2
GO:0042772	DNA damage response, signal transduction resulting in transcription	2/55	18/18670	0.00126485	0.0047499	0.00191844	TP53/MUC1	2
GO:0071318	cellular response to ATP	2/55	18/18670	0.00126485	0.0047499	0.00191844	SOD1/PTGS2	2
GO:0150078	positive regulation of neuroinflammatory response	2/55	18/18670	0.00126485	0.0047499	0.00191844	TNF/CCL3	2
GO:1902165	regulation of intrinsic apoptotic signaling pathway in response to DNA damage by p53 class mediator	2/55	18/18670	0.00126485	0.0047499	0.00191844	BCL2/MUC1	2
GO:0014015	positive regulation of gliogenesis	3/55	74/18670	0.00135251	0.00506114	0.00204414	TNF/CCL3/RELA	3
GO:0099601	regulation of neurotransmitter receptor activity	3/55	74/18670	0.00135251	0.00506114	0.00204414	APP/NEFL/CCL2	3
GO:1903036	positive regulation of response to wounding	3/55	74/18670	0.00135251	0.00506114	0.00204414	F2/SERPINE1/F7	3
GO:0060047	heart contraction	5/55	280/18670	0.00138045	0.00515703	0.00208287	SOD1/EDN1/EDN3/DRD2/NOS3	5
GO:0035821	modification of morphology or physiology of other organism	4/55	164/18670	0.00138138	0.00515703	0.00208287	F2/JUN/CCL3/BCL2L1	4
GO:0007422	peripheral nervous system development	3/55	75/18670	0.00140594	0.00518834	0.00209552	SOD1/NEFH/RELA	3
GO:0002363	alpha-beta T cell lineage commitment	2/55	19/18670	0.00141098	0.00518834	0.00209552	BCL2/STAT3	2
GO:0010544	negative regulation of platelet activation	2/55	19/18670	0.00141098	0.00518834	0.00209552	F2/NOS3	2
GO:0010888	negative regulation of lipid storage	2/55	19/18670	0.00141098	0.00518834	0.00209552	TNF/NFKBIA	2
GO:0030949	positive regulation of vascular endothelial growth factor receptor signaling pathway	2/55	19/18670	0.00141098	0.00518834	0.00209552	VEGFA/HIF1A	2
GO:0042789	mRNA transcription by RNA polymerase II	2/55	19/18670	0.00141098	0.00518834	0.00209552	STAT3/HIF1A	2
GO:0060149	negative regulation of posttranscriptional gene silencing	2/55	19/18670	0.00141098	0.00518834	0.00209552	ESR1/TP53	2
GO:0060967	negative regulation of gene silencing by RNA	2/55	19/18670	0.00141098	0.00518834	0.00209552	ESR1/TP53	2
GO:0071243	cellular response to arsenic-containing substance	2/55	19/18670	0.00141098	0.00518834	0.00209552	HMOX1/VCP	2
GO:1900409	positive regulation of cellular response to oxidative stress	2/55	19/18670	0.00141098	0.00518834	0.00209552	SOD1/TNF	2
GO:1902074	response to salt	2/55	19/18670	0.00141098	0.00518834	0.00209552	EDN1/NEFL	2
GO:1903798	regulation of production of miRNAs involved in gene silencing by miRNA	2/55	19/18670	0.00141098	0.00518834	0.00209552	ESR1/TP53	2
GO:0050954	sensory perception of mechanical stimulus	4/55	165/18670	0.00141263	0.00518834	0.00209552	SOD1/COL1A1/ICAM1/CASP3	4
GO:0071695	anatomical structure maturation	4/55	165/18670	0.00141263	0.00518834	0.00209552	APP/MMP2/BCL2/HIF1A	4
GO:0097696	STAT cascade	4/55	166/18670	0.00144437	0.00529583	0.00213893	F2/TNF/CCL2/STAT3	4
GO:0007018	microtubule-based movement	5/55	283/18670	0.00144689	0.00529583	0.00213893	SOD1/APP/NEFL/NEFH/HIF1A	5
GO:0016579	protein deubiquitination	5/55	283/18670	0.00144689	0.00529583	0.00213893	ESR1/TP53/NFKBIA/VCP/HIF1A	5
GO:0001937	negative regulation of endothelial cell proliferation	3/55	76/18670	0.00146068	0.005334	0.00215435	TNF/NGFR/CCL2	3
GO:0019674	NAD metabolic process	3/55	76/18670	0.00146068	0.005334	0.00215435	TP53/PTGS2/VCP	3
GO:0031647	regulation of protein stability	5/55	284/18670	0.00146956	0.00536025	0.00216495	TP53/BCL2/MAPK1/SNCA/CASP3	5
GO:1901568	fatty acid derivative metabolic process	4/55	167/18670	0.00147661	0.00537979	0.00217284	EDN1/PTGS1/CYP2C19/PTGS2	4
GO:0009896	positive regulation of catabolic process	6/55	423/18670	0.00148135	0.00539089	0.00217732	TNF/APP/HMOX1/SNCA/VCP/HIF1A	6
GO:0051403	stress-activated MAPK cascade	5/55	286/18670	0.00151567	0.00548827	0.00221665	TNF/APP/EDN1/VEGFA/MAPK1	5
GO:0008344	adult locomotory behavior	3/55	77/18670	0.00151674	0.00548827	0.00221665	APP/DRD2/SNCA	3
GO:0051851	modification by host of symbiont morphology or physiology	3/55	77/18670	0.00151674	0.00548827	0.00221665	F2/JUN/CCL3	3
GO:0051937	catecholamine transport	3/55	77/18670	0.00151674	0.00548827	0.00221665	DRD2/CNR1/SNCA	3
GO:0061418	regulation of transcription from RNA polymerase II promoter in response to hypoxia	3/55	77/18670	0.00151674	0.00548827	0.00221665	TP53/VEGFA/HIF1A	3
GO:0030307	positive regulation of cell growth	4/55	169/18670	0.00154258	0.00557541	0.00225185	F2/EDN1/BCL2/VEGFA	4
GO:0002793	positive regulation of peptide secretion	5/55	288/18670	0.00156284	0.0055921	0.00225859	TNF/CCL3/DRD2/MMP12/HIF1A	5
GO:0010042	response to manganese ion	2/55	20/18670	0.0015648	0.0055921	0.00225859	APP/PTGS2	2
GO:0030220	platelet formation	2/55	20/18670	0.0015648	0.0055921	0.00225859	CASP3/CASP9	2
GO:0032495	response to muramyl dipeptide	2/55	20/18670	0.0015648	0.0055921	0.00225859	NFKBIA/RELA	2
GO:0043369	CD4-positive or CD8-positive, alpha-beta T cell lineage commitment	2/55	20/18670	0.0015648	0.0055921	0.00225859	BCL2/STAT3	2
GO:0048148	behavioral response to cocaine	2/55	20/18670	0.0015648	0.0055921	0.00225859	DRD2/SNCA	2
GO:0051580	regulation of neurotransmitter uptake	2/55	20/18670	0.0015648	0.0055921	0.00225859	DRD2/SNCA	2
GO:0051767	nitric-oxide synthase biosynthetic process	2/55	20/18670	0.0015648	0.0055921	0.00225859	EDN1/CCL2	2
GO:0051769	regulation of nitric-oxide synthase biosynthetic process	2/55	20/18670	0.0015648	0.0055921	0.00225859	EDN1/CCL2	2
GO:0060261	positive regulation of transcription initiation from RNA polymerase II promoter	2/55	20/18670	0.0015648	0.0055921	0.00225859	ESR1/TP53	2
GO:0008306	associative learning	3/55	78/18670	0.00157414	0.00560656	0.00226443	APP/DRD2/HIF1A	3
GO:0010827	regulation of glucose transmembrane transport	3/55	78/18670	0.00157414	0.00560656	0.00226443	TNF/EDN1/EDNRA	3
GO:0072332	intrinsic apoptotic signaling pathway by p53 class mediator	3/55	78/18670	0.00157414	0.00560656	0.00226443	TP53/BCL2/MUC1	3
GO:0016241	regulation of macroautophagy	4/55	171/18670	0.00161059	0.00572532	0.0023124	TP53/HMOX1/CASP3/HIF1A	4
GO:0003015	heart process	5/55	290/18670	0.00161109	0.00572532	0.0023124	SOD1/EDN1/EDN3/DRD2/NOS3	5
GO:0003151	outflow tract morphogenesis	3/55	79/18670	0.00163289	0.00578982	0.00233845	JUN/VEGFA/HIF1A	3
GO:0055072	iron ion homeostasis	3/55	79/18670	0.00163289	0.00578982	0.00233845	SOD1/HMOX1/HIF1A	3
GO:0030324	lung development	4/55	172/18670	0.00164536	0.00582106	0.00235107	TNF/VEGFA/MAPK1/NOS3	4
GO:0032874	positive regulation of stress-activated MAPK cascade	4/55	172/18670	0.00164536	0.00582106	0.00235107	TNF/APP/EDN1/VEGFA	4
GO:0070304	positive regulation of stress-activated protein kinase signaling cascade	4/55	173/18670	0.00168066	0.00593931	0.00239883	TNF/APP/EDN1/VEGFA	4
GO:2001252	positive regulation of chromosome organization	4/55	174/18670	0.00171647	0.00599379	0.00242083	TP53/VEGFA/MUC1/MAPK1	4
GO:0001956	positive regulation of neurotransmitter secretion	2/55	21/18670	0.00172626	0.00599379	0.00242083	CNR1/SNCA	2
GO:0002438	acute inflammatory response to antigenic stimulus	2/55	21/18670	0.00172626	0.00599379	0.00242083	ICAM1/CNR1	2
GO:0010310	regulation of hydrogen peroxide metabolic process	2/55	21/18670	0.00172626	0.00599379	0.00242083	SNCA/STAT3	2
GO:0017000	antibiotic biosynthetic process	2/55	21/18670	0.00172626	0.00599379	0.00242083	SOD1/STAT3	2
GO:0030502	negative regulation of bone mineralization	2/55	21/18670	0.00172626	0.00599379	0.00242083	CCL3/HIF1A	2
GO:0030728	ovulation	2/55	21/18670	0.00172626	0.00599379	0.00242083	NOS3/PTGS2	2
GO:0035162	embryonic hemopoiesis	2/55	21/18670	0.00172626	0.00599379	0.00242083	VEGFA/HIF1A	2
GO:0035813	regulation of renal sodium excretion	2/55	21/18670	0.00172626	0.00599379	0.00242083	EDN1/DRD2	2
GO:0036344	platelet morphogenesis	2/55	21/18670	0.00172626	0.00599379	0.00242083	CASP3/CASP9	2
GO:0046716	muscle cell cellular homeostasis	2/55	21/18670	0.00172626	0.00599379	0.00242083	SOD1/HIF1A	2
GO:0048245	eosinophil chemotaxis	2/55	21/18670	0.00172626	0.00599379	0.00242083	CCL3/CCL2	2
GO:0070920	regulation of production of small RNA involved in gene silencing by RNA	2/55	21/18670	0.00172626	0.00599379	0.00242083	ESR1/TP53	2
GO:0090280	positive regulation of calcium ion import	2/55	21/18670	0.00172626	0.00599379	0.00242083	CCL3/CCL2	2
GO:1900273	positive regulation of long-term synaptic potentiation	2/55	21/18670	0.00172626	0.00599379	0.00242083	APP/DRD2	2
GO:1902884	positive regulation of response to oxidative stress	2/55	21/18670	0.00172626	0.00599379	0.00242083	SOD1/TNF	2
GO:0016236	macroautophagy	5/55	295/18670	0.00173651	0.00602281	0.00243255	TP53/HMOX1/CASP3/VCP/HIF1A	5
GO:0002695	negative regulation of leukocyte activation	4/55	175/18670	0.00175282	0.0060652	0.00244967	HMOX1/CNR1/CNR2/CASP3	4
GO:1902930	regulation of alcohol biosynthetic process	3/55	81/18670	0.00175446	0.0060652	0.00244967	SOD1/TNF/SNCA	3
GO:2001021	negative regulation of response to DNA damage stimulus	3/55	81/18670	0.00175446	0.0060652	0.00244967	BCL2/MUC1/BCL2L1	3
GO:0030323	respiratory tube development	4/55	176/18670	0.0017897	0.00618029	0.00249616	TNF/VEGFA/MAPK1/NOS3	4
GO:0034644	cellular response to UV	3/55	82/18670	0.00181731	0.00625524	0.00252643	TP53/PTGS2/CASP9	3
GO:0051702	interaction with symbiont	3/55	82/18670	0.00181731	0.00625524	0.00252643	F2/JUN/CCL3	3
GO:0090049	regulation of cell migration involved in sprouting angiogenesis	3/55	82/18670	0.00181731	0.00625524	0.00252643	HMOX1/VEGFA/PTGS2	3
GO:0001959	regulation of cytokine-mediated signaling pathway	4/55	177/18670	0.00182711	0.00627538	0.00253456	TNF/EDN1/MMP12/HIF1A	4
GO:0048469	cell maturation	4/55	177/18670	0.00182711	0.00627538	0.00253456	APP/BCL2/VEGFA/HIF1A	4
GO:0070646	protein modification by small protein removal	5/55	299/18670	0.0018419	0.00631936	0.00255233	ESR1/TP53/NFKBIA/VCP/HIF1A	5
GO:0045913	positive regulation of carbohydrate metabolic process	3/55	83/18670	0.00188155	0.00641938	0.00259272	APP/SNCA/HIF1A	3
GO:0048145	regulation of fibroblast proliferation	3/55	83/18670	0.00188155	0.00641938	0.00259272	ESR1/TP53/JUN	3
GO:0010869	regulation of receptor biosynthetic process	2/55	22/18670	0.0018953	0.00641938	0.00259272	EDN1/HIF1A	2
GO:0032469	endoplasmic reticulum calcium ion homeostasis	2/55	22/18670	0.0018953	0.00641938	0.00259272	APP/BCL2	2
GO:0034643	establishment of mitochondrion localization, microtubule-mediated	2/55	22/18670	0.0018953	0.00641938	0.00259272	NEFL/HIF1A	2
GO:0035809	regulation of urine volume	2/55	22/18670	0.0018953	0.00641938	0.00259272	EDN1/DRD2	2
GO:0044321	response to leptin	2/55	22/18670	0.0018953	0.00641938	0.00259272	EDN1/STAT3	2
GO:0047497	mitochondrion transport along microtubule	2/55	22/18670	0.0018953	0.00641938	0.00259272	NEFL/HIF1A	2
GO:0051000	positive regulation of nitric-oxide synthase activity	2/55	22/18670	0.0018953	0.00641938	0.00259272	TNF/HIF1A	2
GO:0051195	negative regulation of cofactor metabolic process	2/55	22/18670	0.0018953	0.00641938	0.00259272	TP53/STAT3	2
GO:0090312	positive regulation of protein deacetylation	2/55	22/18670	0.0018953	0.00641938	0.00259272	TP53/VEGFA	2
GO:1903589	positive regulation of blood vessel endothelial cell proliferation involved in sprouting angiogenesis	2/55	22/18670	0.0018953	0.00641938	0.00259272	HMOX1/VEGFA	2
GO:0048771	tissue remodeling	4/55	179/18670	0.00190356	0.00644049	0.00260125	TP53/MMP2/NOS3/HIF1A	4
GO:0014910	regulation of smooth muscle cell migration	3/55	84/18670	0.00194719	0.00657411	0.00265521	PLAU/SERPINE1/BCL2	3
GO:0048144	fibroblast proliferation	3/55	84/18670	0.00194719	0.00657411	0.00265521	ESR1/TP53/JUN	3
GO:0048015	phosphatidylinositol-mediated signaling	4/55	181/18670	0.00198221	0.00668521	0.00270009	F2/TNF/EDN1/MAPK1	4
GO:0050772	positive regulation of axonogenesis	3/55	85/18670	0.00201425	0.00677889	0.00273792	NEFL/NGFR/VEGFA	3
GO:0072384	organelle transport along microtubule	3/55	85/18670	0.00201425	0.00677889	0.00273792	NEFL/NEFH/HIF1A	3
GO:0002040	sprouting angiogenesis	4/55	183/18670	0.00206308	0.00689257	0.00278384	NGFR/HMOX1/VEGFA/PTGS2	4
GO:0043123	positive regulation of I-kappaB kinase/NF-kappaB signaling	4/55	183/18670	0.00206308	0.00689257	0.00278384	TNF/HMOX1/ATP2C1/RELA	4
GO:0045088	regulation of innate immune response	6/55	452/18670	0.00207085	0.00689257	0.00278384	ESR1/DRD2/MUC1/NFKBIA/MMP12/RELA	6
GO:0007413	axonal fasciculation	2/55	23/18670	0.00207189	0.00689257	0.00278384	CNR1/CASP3	2
GO:0035812	renal sodium excretion	2/55	23/18670	0.00207189	0.00689257	0.00278384	EDN1/DRD2	2
GO:0045109	intermediate filament organization	2/55	23/18670	0.00207189	0.00689257	0.00278384	NEFL/NEFH	2
GO:0045821	positive regulation of glycolytic process	2/55	23/18670	0.00207189	0.00689257	0.00278384	APP/HIF1A	2
GO:0050995	negative regulation of lipid catabolic process	2/55	23/18670	0.00207189	0.00689257	0.00278384	TNF/CNR1	2
GO:0106030	neuron projection fasciculation	2/55	23/18670	0.00207189	0.00689257	0.00278384	CNR1/CASP3	2
GO:1902254	negative regulation of intrinsic apoptotic signaling pathway by p53 class mediator	2/55	23/18670	0.00207189	0.00689257	0.00278384	BCL2/MUC1	2
GO:2000637	positive regulation of gene silencing by miRNA	2/55	23/18670	0.00207189	0.00689257	0.00278384	TP53/STAT3	2
GO:0001776	leukocyte homeostasis	3/55	86/18670	0.00208273	0.00691414	0.00279255	BCL2/CASP3/HIF1A	3
GO:0001942	hair follicle development	3/55	86/18670	0.00208273	0.00691414	0.00279255	TNF/BCL2/RELA	3
GO:0048017	inositol lipid-mediated signaling	4/55	184/18670	0.00210436	0.00697137	0.00281566	F2/TNF/EDN1/MAPK1	4
GO:2000045	regulation of G1/S transition of mitotic cell cycle	4/55	184/18670	0.00210436	0.00697137	0.00281566	TP53/BCL2/CCL2/MUC1	4
GO:1902275	regulation of chromatin organization	4/55	185/18670	0.0021462	0.0070952	0.00286568	TP53/VEGFA/MUC1/SNCA	4
GO:1903708	positive regulation of hemopoiesis	4/55	185/18670	0.0021462	0.0070952	0.00286568	TNF/JUN/STAT3/HIF1A	4
GO:0045844	positive regulation of striated muscle tissue development	3/55	87/18670	0.00215264	0.00710171	0.00286831	EDN1/BCL2/MAPK1	3
GO:0048636	positive regulation of muscle organ development	3/55	87/18670	0.00215264	0.00710171	0.00286831	EDN1/BCL2/MAPK1	3
GO:0022404	molting cycle process	3/55	88/18670	0.002224	0.0072917	0.00294504	TNF/BCL2/RELA	3
GO:0022405	hair cycle process	3/55	88/18670	0.002224	0.0072917	0.00294504	TNF/BCL2/RELA	3
GO:0097194	execution phase of apoptosis	3/55	88/18670	0.002224	0.0072917	0.00294504	TP53/CASP3/BCL2L1	3
GO:0098773	skin epidermis development	3/55	88/18670	0.002224	0.0072917	0.00294504	TNF/BCL2/RELA	3
GO:1900407	regulation of cellular response to oxidative stress	3/55	88/18670	0.002224	0.0072917	0.00294504	SOD1/TNF/HIF1A	3
GO:1901863	positive regulation of muscle tissue development	3/55	88/18670	0.002224	0.0072917	0.00294504	EDN1/BCL2/MAPK1	3
GO:1905475	regulation of protein localization to membrane	4/55	187/18670	0.00223162	0.00730609	0.00295085	TNF/TP53/BCL2/BCL2L1	4
GO:0001919	regulation of receptor recycling	2/55	24/18670	0.00225599	0.00730609	0.00295085	SNCA/ECE1	2
GO:0002092	positive regulation of receptor internalization	2/55	24/18670	0.00225599	0.00730609	0.00295085	DRD2/VEGFA	2
GO:0002861	regulation of inflammatory response to antigenic stimulus	2/55	24/18670	0.00225599	0.00730609	0.00295085	TNF/CNR1	2
GO:0010288	response to lead ion	2/55	24/18670	0.00225599	0.00730609	0.00295085	APP/PTGS2	2
GO:0010640	regulation of platelet-derived growth factor receptor signaling pathway	2/55	24/18670	0.00225599	0.00730609	0.00295085	F7/SNCA	2
GO:0032897	negative regulation of viral transcription	2/55	24/18670	0.00225599	0.00730609	0.00295085	JUN/CCL3	2
GO:0044062	regulation of excretion	2/55	24/18670	0.00225599	0.00730609	0.00295085	EDN1/DRD2	2
GO:0046697	decidualization	2/55	24/18670	0.00225599	0.00730609	0.00295085	MAPK1/PTGS2	2
GO:0060148	positive regulation of posttranscriptional gene silencing	2/55	24/18670	0.00225599	0.00730609	0.00295085	TP53/STAT3	2
GO:0060343	trabecula formation	2/55	24/18670	0.00225599	0.00730609	0.00295085	COL1A1/MMP2	2
GO:0071677	positive regulation of mononuclear cell migration	2/55	24/18670	0.00225599	0.00730609	0.00295085	TNF/SERPINE1	2
GO:0007193	adenylate cyclase-inhibiting G protein-coupled receptor signaling pathway	3/55	89/18670	0.00229682	0.00741563	0.0029951	EDN1/DRD2/EDNRA	3
GO:0032410	negative regulation of transporter activity	3/55	89/18670	0.00229682	0.00741563	0.0029951	DRD2/MMP9/SNCA	3
GO:0046427	positive regulation of JAK-STAT cascade	3/55	89/18670	0.00229682	0.00741563	0.0029951	F2/TNF/STAT3	3
GO:0031098	stress-activated protein kinase signaling cascade	5/55	315/18670	0.00231097	0.0074462	0.00300744	TNF/APP/EDN1/VEGFA/MAPK1	5
GO:0070588	calcium ion transmembrane transport	5/55	315/18670	0.00231097	0.0074462	0.00300744	F2/CCL3/DRD2/SNCA/ATP2C1	5
GO:0006898	receptor-mediated endocytosis	5/55	316/18670	0.00234292	0.0075415	0.00304593	SERPINE1/DRD2/VEGFA/SNCA/HBA2	5
GO:0008544	epidermis development	6/55	464/18670	0.00236101	0.00759202	0.00306634	SOD1/TNF/BCL2/CASP3/ATP2C1/RELA	6
GO:0060759	regulation of response to cytokine stimulus	4/55	190/18670	0.00236411	0.00759432	0.00306727	TNF/EDN1/MMP12/HIF1A	4
GO:0015844	monoamine transport	3/55	90/18670	0.0023711	0.00760138	0.00307012	DRD2/CNR1/SNCA	3
GO:0031058	positive regulation of histone modification	3/55	90/18670	0.0023711	0.00760138	0.00307012	TP53/VEGFA/MUC1	3
GO:0042594	response to starvation	4/55	191/18670	0.00240945	0.00770879	0.0031135	TP53/JUN/BCL2/MAPK1	4
GO:0071478	cellular response to radiation	4/55	191/18670	0.00240945	0.00770879	0.0031135	TP53/PTGS2/CASP9/BCL2L1	4
GO:0014909	smooth muscle cell migration	3/55	91/18670	0.00244685	0.00775257	0.00313119	PLAU/SERPINE1/BCL2	3
GO:0051899	membrane depolarization	3/55	91/18670	0.00244685	0.00775257	0.00313119	EDN1/JUN/BCL2	3
GO:0002719	negative regulation of cytokine production involved in immune response	2/55	25/18670	0.00244754	0.00775257	0.00313119	TNF/HMOX1	2
GO:0030813	positive regulation of nucleotide catabolic process	2/55	25/18670	0.00244754	0.00775257	0.00313119	APP/HIF1A	2
GO:0031639	plasminogen activation	2/55	25/18670	0.00244754	0.00775257	0.00313119	PLAU/SERPINE1	2
GO:0032461	positive regulation of protein oligomerization	2/55	25/18670	0.00244754	0.00775257	0.00313119	MMP1/TP53	2
GO:0050927	positive regulation of positive chemotaxis	2/55	25/18670	0.00244754	0.00775257	0.00313119	F7/VEGFA	2
GO:0051197	positive regulation of coenzyme metabolic process	2/55	25/18670	0.00244754	0.00775257	0.00313119	APP/HIF1A	2
GO:0051654	establishment of mitochondrion localization	2/55	25/18670	0.00244754	0.00775257	0.00313119	NEFL/HIF1A	2
GO:0072677	eosinophil migration	2/55	25/18670	0.00244754	0.00775257	0.00313119	CCL3/CCL2	2
GO:0007219	Notch signaling pathway	4/55	193/18670	0.00250193	0.00791697	0.00319758	APP/NFKBIA/NOS3/STAT3	4
GO:0045833	negative regulation of lipid metabolic process	3/55	92/18670	0.00252409	0.00797121	0.00321949	SOD1/TNF/CNR1	3
GO:1904894	positive regulation of STAT cascade	3/55	92/18670	0.00252409	0.00797121	0.00321949	F2/TNF/STAT3	3
GO:0007589	body fluid secretion	3/55	93/18670	0.00260283	0.00819542	0.00331005	EDN1/VEGFA/HIF1A	3
GO:0036473	cell death in response to oxidative stress	3/55	93/18670	0.00260283	0.00819542	0.00331005	SOD1/BCL2/HIF1A	3
GO:1901655	cellular response to ketone	3/55	93/18670	0.00260283	0.00819542	0.00331005	ICAM1/CASP9/ABCC2	3
GO:0010460	positive regulation of heart rate	2/55	26/18670	0.00264651	0.00829186	0.003349	EDN1/EDN3	2
GO:0030318	melanocyte differentiation	2/55	26/18670	0.00264651	0.00829186	0.003349	BCL2/EDN3	2
GO:0050926	regulation of positive chemotaxis	2/55	26/18670	0.00264651	0.00829186	0.003349	F7/VEGFA	2
GO:1900739	regulation of protein insertion into mitochondrial membrane involved in apoptotic signaling pathway	2/55	26/18670	0.00264651	0.00829186	0.003349	TP53/BCL2	2
GO:1900740	positive regulation of protein insertion into mitochondrial membrane involved in apoptotic signaling pathway	2/55	26/18670	0.00264651	0.00829186	0.003349	TP53/BCL2	2
GO:0009615	response to virus	5/55	326/18670	0.00268044	0.00838987	0.00338858	TNF/BCL2/MMP12/RELA/BCL2L1	5
GO:0070167	regulation of biomineral tissue development	3/55	94/18670	0.00268307	0.00838987	0.00338858	CCL3/NOS3/HIF1A	3
GO:0060541	respiratory system development	4/55	198/18670	0.00274377	0.00857125	0.00346184	TNF/VEGFA/MAPK1/NOS3	4
GO:0044070	regulation of anion transport	3/55	95/18670	0.00276482	0.00862007	0.00348156	EDN1/ABCB1/SNCA	3
GO:0051952	regulation of amine transport	3/55	95/18670	0.00276482	0.00862007	0.00348156	DRD2/CNR1/SNCA	3
GO:0016052	carbohydrate catabolic process	4/55	199/18670	0.002794	0.00870248	0.00351484	TP53/APP/STAT3/HIF1A	4
GO:0001655	urogenital system development	5/55	330/18670	0.00282488	0.00875698	0.00353686	ESR1/BCL2/MMP9/VEGFA/CASP9	5
GO:0010660	regulation of muscle cell apoptotic process	3/55	96/18670	0.0028481	0.00875698	0.00353686	TP53/EDN1/HMOX1	3
GO:0019217	regulation of fatty acid metabolic process	3/55	96/18670	0.0028481	0.00875698	0.00353686	CNR1/PTGS2/SNCA	3
GO:0032755	positive regulation of interleukin-6 production	3/55	96/18670	0.0028481	0.00875698	0.00353686	TNF/APP/STAT3	3
GO:0015711	organic anion transport	6/55	482/18670	0.00285264	0.00875698	0.00353686	EDN1/ABCB1/DRD2/SNCA/HBA2/ABCC2	6
GO:0009651	response to salt stress	2/55	27/18670	0.00285284	0.00875698	0.00353686	TNF/TP53	2
GO:0043921	modulation by host of viral transcription	2/55	27/18670	0.00285284	0.00875698	0.00353686	JUN/CCL3	2
GO:0045932	negative regulation of muscle contraction	2/55	27/18670	0.00285284	0.00875698	0.00353686	SOD1/PTGS2	2
GO:0046885	regulation of hormone biosynthetic process	2/55	27/18670	0.00285284	0.00875698	0.00353686	TNF/HIF1A	2
GO:0048143	astrocyte activation	2/55	27/18670	0.00285284	0.00875698	0.00353686	TNF/APP	2
GO:0052472	modulation by host of symbiont transcription	2/55	27/18670	0.00285284	0.00875698	0.00353686	JUN/CCL3	2
GO:0060259	regulation of feeding behavior	2/55	27/18670	0.00285284	0.00875698	0.00353686	CNR1/STAT3	2
GO:0098810	neurotransmitter reuptake	2/55	27/18670	0.00285284	0.00875698	0.00353686	DRD2/SNCA	2
GO:1901623	regulation of lymphocyte chemotaxis	2/55	27/18670	0.00285284	0.00875698	0.00353686	CCL3/CCL2	2
GO:1902175	regulation of oxidative stress-induced intrinsic apoptotic signaling pathway	2/55	27/18670	0.00285284	0.00875698	0.00353686	SOD1/HIF1A	2
GO:0008202	steroid metabolic process	5/55	331/18670	0.00286185	0.00877616	0.0035446	SOD1/TNF/ESR1/APP/CYP2C19	5
GO:0034248	regulation of cellular amide metabolic process	6/55	483/18670	0.00288205	0.00882956	0.00356617	TNF/APP/MAPK1/SNCA/STAT3/CASP3	6
GO:0016049	cell growth	6/55	484/18670	0.00291168	0.00891175	0.00359937	F2/TP53/APP/EDN1/BCL2/VEGFA	6
GO:0015908	fatty acid transport	3/55	97/18670	0.00293292	0.0089595	0.00361865	EDN1/DRD2/ABCC2	3
GO:1902882	regulation of response to oxidative stress	3/55	97/18670	0.00293292	0.0089595	0.00361865	SOD1/TNF/HIF1A	3
GO:0032147	activation of protein kinase activity	5/55	333/18670	0.00293685	0.00896291	0.00362003	SOD1/TNF/DRD2/VEGFA/MAPK1	5
GO:0009746	response to hexose	4/55	202/18670	0.00294845	0.00898106	0.00362736	ICAM1/PTGS2/CASP3/HIF1A	4
GO:1902806	regulation of cell cycle G1/S phase transition	4/55	202/18670	0.00294845	0.00898106	0.00362736	TP53/BCL2/CCL2/MUC1	4
GO:0002042	cell migration involved in sprouting angiogenesis	3/55	98/18670	0.00301928	0.0091529	0.00369676	HMOX1/VEGFA/PTGS2	3
GO:0006885	regulation of pH	3/55	98/18670	0.00301928	0.0091529	0.00369676	EDN1/BCL2/MAPK1	3
GO:0043473	pigmentation	3/55	98/18670	0.00301928	0.0091529	0.00369676	BCL2/EDN3/DRD2	3
GO:0050764	regulation of phagocytosis	3/55	98/18670	0.00301928	0.0091529	0.00369676	SOD1/TNF/CCL2	3
GO:0060191	regulation of lipase activity	3/55	98/18670	0.00301928	0.0091529	0.00369676	ESR1/EDNRA/SNCA	3
GO:0032770	positive regulation of monooxygenase activity	2/55	28/18670	0.0030665	0.00923439	0.00372968	TNF/HIF1A	2
GO:0033598	mammary gland epithelial cell proliferation	2/55	28/18670	0.0030665	0.00923439	0.00372968	ESR1/MAPK1	2
GO:0051123	RNA polymerase II preinitiation complex assembly	2/55	28/18670	0.0030665	0.00923439	0.00372968	ESR1/TP53	2
GO:0052312	modulation of transcription in other organism involved in symbiotic interaction	2/55	28/18670	0.0030665	0.00923439	0.00372968	JUN/CCL3	2
GO:0060260	regulation of transcription initiation from RNA polymerase II promoter	2/55	28/18670	0.0030665	0.00923439	0.00372968	ESR1/TP53	2
GO:1902932	positive regulation of alcohol biosynthetic process	2/55	28/18670	0.0030665	0.00923439	0.00372968	TNF/SNCA	2
GO:1990776	response to angiotensin	2/55	28/18670	0.0030665	0.00923439	0.00372968	PTGS2/RELA	2
GO:0048525	negative regulation of viral process	3/55	99/18670	0.00310719	0.0093392	0.00377201	TNF/JUN/CCL3	3
GO:1901570	fatty acid derivative biosynthetic process	3/55	99/18670	0.00310719	0.0093392	0.00377201	EDN1/PTGS1/PTGS2	3
GO:0007215	glutamate receptor signaling pathway	3/55	100/18670	0.00319666	0.0095719	0.00386599	APP/NEFL/CCL2	3
GO:0010657	muscle cell apoptotic process	3/55	100/18670	0.00319666	0.0095719	0.00386599	TP53/EDN1/HMOX1	3
GO:0060079	excitatory postsynaptic potential	3/55	100/18670	0.00319666	0.0095719	0.00386599	APP/DRD2/SNCA	3
GO:2001023	regulation of response to drug	3/55	100/18670	0.00319666	0.0095719	0.00386599	DRD2/CNR1/SNCA	3
GO:0034284	response to monosaccharide	4/55	207/18670	0.00321873	0.00962891	0.00388902	ICAM1/PTGS2/CASP3/HIF1A	4
GO:0050792	regulation of viral process	4/55	208/18670	0.00327474	0.00975259	0.00393897	TNF/JUN/CCL3/BCL2	4
GO:0007263	nitric oxide mediated signal transduction	2/55	29/18670	0.00328745	0.00975259	0.00393897	VEGFA/NOS3	2
GO:0010575	positive regulation of vascular endothelial growth factor production	2/55	29/18670	0.00328745	0.00975259	0.00393897	PTGS2/HIF1A	2
GO:0010800	positive regulation of peptidyl-threonine phosphorylation	2/55	29/18670	0.00328745	0.00975259	0.00393897	APP/MAPK1	2
GO:0031063	regulation of histone deacetylation	2/55	29/18670	0.00328745	0.00975259	0.00393897	TP53/VEGFA	2
GO:0070723	response to cholesterol	2/55	29/18670	0.00328745	0.00975259	0.00393897	F7/CCL3	2
GO:0071280	cellular response to copper ion	2/55	29/18670	0.00328745	0.00975259	0.00393897	APP/SNCA	2
GO:0002027	regulation of heart rate	3/55	101/18670	0.0032877	0.00975259	0.00393897	EDN1/EDN3/DRD2	3
GO:1903008	organelle disassembly	3/55	101/18670	0.0032877	0.00975259	0.00393897	TP53/VCP/HIF1A	3
GO:0033044	regulation of chromosome organization	5/55	342/18670	0.00329212	0.00975659	0.00394059	TP53/VEGFA/MUC1/MAPK1/SNCA	5
GO:0051216	cartilage development	4/55	209/18670	0.00333142	0.00986387	0.00398391	COL1A1/EDN1/RELA/HIF1A	4
GO:0010522	regulation of calcium ion transport into cytosol	3/55	102/18670	0.00338032	0.00999002	0.00403487	F2/BCL2/SNCA	3
GO:0015837	amine transport	3/55	102/18670	0.00338032	0.00999002	0.00403487	DRD2/CNR1/SNCA	3
GO:0002446	neutrophil mediated immunity	6/55	499/18670	0.00338422	0.00999226	0.00403577	F2/PLAU/TTR/MMP9/MAPK1/VCP	6
GO:0050707	regulation of cytokine secretion	4/55	210/18670	0.00338877	0.00999639	0.00403744	TNF/CCL3/DRD2/MMP12	4
GO:0018958	phenol-containing compound metabolic process	3/55	103/18670	0.00347453	0.0102209	0.00412812	BCL2/DRD2/SNCA	3
GO:0048259	regulation of receptor-mediated endocytosis	3/55	103/18670	0.00347453	0.0102209	0.00412812	SERPINE1/DRD2/VEGFA	3
GO:1905269	positive regulation of chromatin organization	3/55	103/18670	0.00347453	0.0102209	0.00412812	TP53/VEGFA/MUC1	3
GO:0006888	ER to Golgi vesicle-mediated transport	4/55	212/18670	0.00350547	0.0102847	0.00415389	F2/F10/F7/VCP	4
GO:0001844	protein insertion into mitochondrial membrane involved in apoptotic signaling pathway	2/55	30/18670	0.00351564	0.0102847	0.00415389	TP53/BCL2	2
GO:0048873	homeostasis of number of cells within a tissue	2/55	30/18670	0.00351564	0.0102847	0.00415389	BCL2/NOS3	2
GO:0071480	cellular response to gamma radiation	2/55	30/18670	0.00351564	0.0102847	0.00415389	TP53/BCL2L1	2
GO:0090200	positive regulation of release of cytochrome c from mitochondria	2/55	30/18670	0.00351564	0.0102847	0.00415389	TP53/MMP9	2
GO:1905606	regulation of presynapse assembly	2/55	30/18670	0.00351564	0.0102847	0.00415389	APP/SNCA	2
GO:0014812	muscle cell migration	3/55	104/18670	0.00357033	0.0104159	0.00420689	PLAU/SERPINE1/BCL2	3
GO:0046822	regulation of nucleocytoplasmic transport	3/55	104/18670	0.00357033	0.0104159	0.00420689	TP53/MAPK1/PTGS2	3
GO:0046928	regulation of neurotransmitter secretion	3/55	104/18670	0.00357033	0.0104159	0.00420689	DRD2/CNR1/SNCA	3
GO:0008593	regulation of Notch signaling pathway	3/55	105/18670	0.00366774	0.0106805	0.00431374	NFKBIA/NOS3/STAT3	3
GO:0043266	regulation of potassium ion transport	3/55	105/18670	0.00366774	0.0106805	0.00431374	EDN3/DRD2/NOS3	3
GO:0032388	positive regulation of intracellular transport	4/55	215/18670	0.00368562	0.0107227	0.0043308	TP53/CNR1/MAPK1/PTGS2	4
GO:0002082	regulation of oxidative phosphorylation	2/55	31/18670	0.00375102	0.0108435	0.00437958	SNCA/VCP	2
GO:0010165	response to X-ray	2/55	31/18670	0.00375102	0.0108435	0.00437958	TP53/CASP3	2
GO:0010543	regulation of platelet activation	2/55	31/18670	0.00375102	0.0108435	0.00437958	F2/NOS3	2
GO:0033198	response to ATP	2/55	31/18670	0.00375102	0.0108435	0.00437958	SOD1/PTGS2	2
GO:0040018	positive regulation of multicellular organism growth	2/55	31/18670	0.00375102	0.0108435	0.00437958	BCL2/DRD2	2
GO:0045648	positive regulation of erythrocyte differentiation	2/55	31/18670	0.00375102	0.0108435	0.00437958	STAT3/HIF1A	2
GO:0099174	regulation of presynapse organization	2/55	31/18670	0.00375102	0.0108435	0.00437958	APP/SNCA	2
GO:0002286	T cell activation involved in immune response	3/55	106/18670	0.00376676	0.0108791	0.00439396	TP53/ICAM1/STAT3	3
GO:0017157	regulation of exocytosis	4/55	217/18670	0.00380917	0.0109916	0.00443938	HMOX1/DRD2/CNR1/SNCA	4
GO:0050905	neuromuscular process	3/55	107/18670	0.00386741	0.0111495	0.00450317	APP/NEFL/DRD2	3
GO:0099565	chemical synaptic transmission, postsynaptic	3/55	108/18670	0.00396968	0.0114097	0.00460825	APP/DRD2/SNCA	3
GO:1904659	glucose transmembrane transport	3/55	108/18670	0.00396968	0.0114097	0.00460825	TNF/EDN1/EDNRA	3
GO:0042311	vasodilation	2/55	32/18670	0.00399356	0.0114097	0.00460825	SOD1/NOS3	2
GO:0042744	hydrogen peroxide catabolic process	2/55	32/18670	0.00399356	0.0114097	0.00460825	SNCA/HBA2	2
GO:0045745	positive regulation of G protein-coupled receptor signaling pathway	2/55	32/18670	0.00399356	0.0114097	0.00460825	F2/DRD2	2
GO:0045907	positive regulation of vasoconstriction	2/55	32/18670	0.00399356	0.0114097	0.00460825	ICAM1/PTGS2	2
GO:0045987	positive regulation of smooth muscle contraction	2/55	32/18670	0.00399356	0.0114097	0.00460825	EDN1/PTGS2	2
GO:0051385	response to mineralocorticoid	2/55	32/18670	0.00399356	0.0114097	0.00460825	EDN1/NEFL	2
GO:0051968	positive regulation of synaptic transmission, glutamatergic	2/55	32/18670	0.00399356	0.0114097	0.00460825	CCL2/PTGS2	2
GO:0060325	face morphogenesis	2/55	32/18670	0.00399356	0.0114097	0.00460825	COL1A1/MMP2	2
GO:0007188	adenylate cyclase-modulating G protein-coupled receptor signaling pathway	4/55	221/18670	0.00406464	0.0116023	0.00468605	EDN1/DRD2/CNR1/EDNRA	4
GO:0001676	long-chain fatty acid metabolic process	3/55	109/18670	0.0040736	0.011607	0.00468795	PTGS1/CYP2C19/PTGS2	3
GO:0021761	limbic system development	3/55	109/18670	0.0040736	0.011607	0.00468795	NEFL/DRD2/CASP3	3
GO:0043903	regulation of symbiosis, encompassing mutualism through parasitism	4/55	222/18670	0.00413028	0.011758	0.00474892	TNF/JUN/CCL3/BCL2	4
GO:0001654	eye development	5/55	362/18670	0.00419136	0.0119212	0.00481484	JUN/BCL2/VEGFA/STAT3/HIF1A	5
GO:0016242	negative regulation of macroautophagy	2/55	33/18670	0.00424321	0.0119935	0.00484405	TP53/HMOX1	2
GO:0036314	response to sterol	2/55	33/18670	0.00424321	0.0119935	0.00484405	F7/CCL3	2
GO:0048011	neurotrophin TRK receptor signaling pathway	2/55	33/18670	0.00424321	0.0119935	0.00484405	NGFR/CASP3	2
GO:0051204	protein insertion into mitochondrial membrane	2/55	33/18670	0.00424321	0.0119935	0.00484405	TP53/BCL2	2
GO:0070232	regulation of T cell apoptotic process	2/55	33/18670	0.00424321	0.0119935	0.00484405	TP53/HIF1A	2
GO:1901797	negative regulation of signal transduction by p53 class mediator	2/55	33/18670	0.00424321	0.0119935	0.00484405	BCL2/MUC1	2
GO:2000352	negative regulation of endothelial cell apoptotic process	2/55	33/18670	0.00424321	0.0119935	0.00484405	SERPINE1/ICAM1	2
GO:0031623	receptor internalization	3/55	111/18670	0.00428637	0.0121047	0.00488896	DRD2/VEGFA/SNCA	3
GO:0006869	lipid transport	5/55	365/18670	0.00434001	0.0122453	0.00494576	EDN1/ABCB1/DRD2/NFKBIA/ABCC2	5
GO:0150063	visual system development	5/55	366/18670	0.00439039	0.0123572	0.00499096	JUN/BCL2/VEGFA/STAT3/HIF1A	5
GO:0002065	columnar/cuboidal epithelial cell differentiation	3/55	112/18670	0.00439524	0.0123572	0.00499096	SOD1/SERPINE1/HIF1A	3
GO:0008645	hexose transmembrane transport	3/55	112/18670	0.00439524	0.0123572	0.00499096	TNF/EDN1/EDNRA	3
GO:0098693	regulation of synaptic vesicle cycle	3/55	112/18670	0.00439524	0.0123572	0.00499096	DRD2/CNR1/SNCA	3
GO:0001894	tissue homeostasis	4/55	227/18670	0.00446927	0.0125543	0.00507053	SOD1/BCL2/VEGFA/NOS3	4
GO:0010574	regulation of vascular endothelial growth factor production	2/55	34/18670	0.00449993	0.0126011	0.00508946	PTGS2/HIF1A	2
GO:0043368	positive T cell selection	2/55	34/18670	0.00449993	0.0126011	0.00508946	BCL2/STAT3	2
GO:0045920	negative regulation of exocytosis	2/55	34/18670	0.00449993	0.0126011	0.00508946	HMOX1/SNCA	2
GO:0046620	regulation of organ growth	3/55	113/18670	0.00450578	0.0126011	0.00508946	SOD1/EDN1/MAPK1	3
GO:0060964	regulation of gene silencing by miRNA	3/55	113/18670	0.00450578	0.0126011	0.00508946	ESR1/TP53/STAT3	3
GO:0015749	monosaccharide transmembrane transport	3/55	114/18670	0.004618	0.0128809	0.00520248	TNF/EDN1/EDNRA	3
GO:0030282	bone mineralization	3/55	114/18670	0.004618	0.0128809	0.00520248	CCL3/PTGS2/HIF1A	3
GO:0045446	endothelial cell differentiation	3/55	114/18670	0.004618	0.0128809	0.00520248	TNF/ICAM1/VEGFA	3
GO:0045666	positive regulation of neuron differentiation	5/55	371/18670	0.00464859	0.0129435	0.00522776	NEFL/NGFR/BCL2/VEGFA/CNR1	5
GO:0048880	sensory system development	5/55	371/18670	0.00464859	0.0129435	0.00522776	JUN/BCL2/VEGFA/STAT3/HIF1A	5
GO:0009743	response to carbohydrate	4/55	230/18670	0.00468143	0.0130236	0.00526009	ICAM1/PTGS2/CASP3/HIF1A	4
GO:0001881	receptor recycling	2/55	35/18670	0.00476368	0.0131602	0.00531526	SNCA/ECE1	2
GO:0001893	maternal placenta development	2/55	35/18670	0.00476368	0.0131602	0.00531526	MAPK1/PTGS2	2
GO:0002701	negative regulation of production of molecular mediator of immune response	2/55	35/18670	0.00476368	0.0131602	0.00531526	TNF/HMOX1	2
GO:0010259	multicellular organism aging	2/55	35/18670	0.00476368	0.0131602	0.00531526	TP53/EDN1	2
GO:0070423	nucleotide-binding oligomerization domain containing signaling pathway	2/55	35/18670	0.00476368	0.0131602	0.00531526	NFKBIA/RELA	2
GO:0098801	regulation of renal system process	2/55	35/18670	0.00476368	0.0131602	0.00531526	EDN1/DRD2	2
GO:0110111	negative regulation of animal organ morphogenesis	2/55	35/18670	0.00476368	0.0131602	0.00531526	TNF/BCL2	2
GO:1901030	positive regulation of mitochondrial outer membrane permeabilization involved in apoptotic signaling pathway	2/55	35/18670	0.00476368	0.0131602	0.00531526	TP53/BCL2	2
GO:0021782	glial cell development	3/55	116/18670	0.00484749	0.0133685	0.00539939	SOD1/TNF/APP	3
GO:0034219	carbohydrate transmembrane transport	3/55	116/18670	0.00484749	0.0133685	0.00539939	TNF/EDN1/EDNRA	3
GO:0002761	regulation of myeloid leukocyte differentiation	3/55	117/18670	0.00496478	0.0136446	0.0055109	TNF/JUN/CCL3	3
GO:0007613	memory	3/55	117/18670	0.00496478	0.0136446	0.0055109	DRD2/CNR1/PTGS2	3
GO:0060147	regulation of posttranscriptional gene silencing	3/55	117/18670	0.00496478	0.0136446	0.0055109	ESR1/TP53/STAT3	3
GO:0060966	regulation of gene silencing by RNA	3/55	117/18670	0.00496478	0.0136446	0.0055109	ESR1/TP53/STAT3	3
GO:0009112	nucleobase metabolic process	2/55	36/18670	0.00503441	0.0137173	0.00554026	TTR/MAPK1	2
GO:0010573	vascular endothelial growth factor production	2/55	36/18670	0.00503441	0.0137173	0.00554026	PTGS2/HIF1A	2
GO:0030224	monocyte differentiation	2/55	36/18670	0.00503441	0.0137173	0.00554026	JUN/VEGFA	2
GO:0030947	regulation of vascular endothelial growth factor receptor signaling pathway	2/55	36/18670	0.00503441	0.0137173	0.00554026	VEGFA/HIF1A	2
GO:0035872	nucleotide-binding domain, leucine rich repeat containing receptor signaling pathway	2/55	36/18670	0.00503441	0.0137173	0.00554026	NFKBIA/RELA	2
GO:0042554	superoxide anion generation	2/55	36/18670	0.00503441	0.0137173	0.00554026	SOD1/EDN1	2
GO:0050931	pigment cell differentiation	2/55	36/18670	0.00503441	0.0137173	0.00554026	BCL2/EDN3	2
GO:0071634	regulation of transforming growth factor beta production	2/55	36/18670	0.00503441	0.0137173	0.00554026	PTGS2/HIF1A	2
GO:0090322	regulation of superoxide metabolic process	2/55	36/18670	0.00503441	0.0137173	0.00554026	SOD1/TNF	2
GO:1903131	mononuclear cell differentiation	2/55	36/18670	0.00503441	0.0137173	0.00554026	JUN/VEGFA	2
GO:0042471	ear morphogenesis	3/55	118/18670	0.00508378	0.0138399	0.0055898	SOD1/EDN1/MAPK1	3
GO:0030900	forebrain development	5/55	381/18670	0.00519726	0.0141246	0.00570479	APP/NEFL/DRD2/CASP3/HIF1A	5
GO:0045089	positive regulation of innate immune response	5/55	381/18670	0.00519726	0.0141246	0.00570479	ESR1/MUC1/NFKBIA/MMP12/RELA	5
GO:0016079	synaptic vesicle exocytosis	3/55	119/18670	0.00520449	0.0141322	0.00570785	DRD2/CNR1/SNCA	3
GO:0001662	behavioral fear response	2/55	37/18670	0.00531209	0.0143264	0.00578629	BCL2/DPP4	2
GO:0014037	Schwann cell differentiation	2/55	37/18670	0.00531209	0.0143264	0.00578629	SOD1/RELA	2
GO:0034405	response to fluid shear stress	2/55	37/18670	0.00531209	0.0143264	0.00578629	NOS3/PTGS2	2
GO:0042307	positive regulation of protein import into nucleus	2/55	37/18670	0.00531209	0.0143264	0.00578629	MAPK1/PTGS2	2
GO:0043029	T cell homeostasis	2/55	37/18670	0.00531209	0.0143264	0.00578629	BCL2/CASP3	2
GO:0060323	head morphogenesis	2/55	37/18670	0.00531209	0.0143264	0.00578629	COL1A1/MMP2	2
GO:0071542	dopaminergic neuron differentiation	2/55	37/18670	0.00531209	0.0143264	0.00578629	VEGFA/HIF1A	2
GO:2000403	positive regulation of lymphocyte migration	2/55	37/18670	0.00531209	0.0143264	0.00578629	APP/CCL3	2
GO:0003014	renal system process	3/55	120/18670	0.00532692	0.0143299	0.0057877	EDN1/BCL2/DRD2	3
GO:0006721	terpenoid metabolic process	3/55	120/18670	0.00532692	0.0143299	0.0057877	ADH1C/TTR/CYP2C19	3
GO:0022612	gland morphogenesis	3/55	120/18670	0.00532692	0.0143299	0.0057877	TNF/ESR1/BCL2	3
GO:0030217	T cell differentiation	4/55	240/18670	0.00543756	0.0146028	0.00589793	SOD1/TP53/BCL2/STAT3	4
GO:0050663	cytokine secretion	4/55	240/18670	0.00543756	0.0146028	0.00589793	TNF/CCL3/DRD2/MMP12	4
GO:0043500	muscle adaptation	3/55	122/18670	0.00557696	0.0149417	0.00603479	EDN1/HMOX1/NOS3	3
GO:1905477	positive regulation of protein localization to membrane	3/55	122/18670	0.00557696	0.0149417	0.00603479	TNF/TP53/BCL2	3
GO:0002209	behavioral defense response	2/55	38/18670	0.00559667	0.0149417	0.00603479	BCL2/DPP4	2
GO:0032350	regulation of hormone metabolic process	2/55	38/18670	0.00559667	0.0149417	0.00603479	TNF/HIF1A	2
GO:0048246	macrophage chemotaxis	2/55	38/18670	0.00559667	0.0149417	0.00603479	CCL3/CCL2	2
GO:0060416	response to growth hormone	2/55	38/18670	0.00559667	0.0149417	0.00603479	F7/STAT3	2
GO:0071604	transforming growth factor beta production	2/55	38/18670	0.00559667	0.0149417	0.00603479	PTGS2/HIF1A	2
GO:0014066	regulation of phosphatidylinositol 3-kinase signaling	3/55	124/18670	0.00583396	0.0155621	0.00628538	F2/TNF/MAPK1	3
GO:0038179	neurotrophin signaling pathway	2/55	39/18670	0.0058881	0.0156409	0.00631719	NGFR/CASP3	2
GO:0042417	dopamine metabolic process	2/55	39/18670	0.0058881	0.0156409	0.00631719	DRD2/SNCA	2
GO:0051930	regulation of sensory perception of pain	2/55	39/18670	0.0058881	0.0156409	0.00631719	EDN1/CCL3	2
GO:0060969	negative regulation of gene silencing	2/55	39/18670	0.0058881	0.0156409	0.00631719	ESR1/TP53	2
GO:1904591	positive regulation of protein import	2/55	39/18670	0.0058881	0.0156409	0.00631719	MAPK1/PTGS2	2
GO:0006805	xenobiotic metabolic process	3/55	125/18670	0.00596508	0.0158321	0.00639444	GSTM1/PTGS1/CYP2C19	3
GO:0018107	peptidyl-threonine phosphorylation	3/55	126/18670	0.00609796	0.016159	0.00652644	APP/BCL2/MAPK1	3
GO:1901991	negative regulation of mitotic cell cycle phase transition	4/55	248/18670	0.00609839	0.016159	0.00652644	TP53/BCL2/CCL2/MUC1	4
GO:0071560	cellular response to transforming growth factor beta stimulus	4/55	249/18670	0.00618459	0.0162834	0.0065767	COL1A1/TP53/EDN1/JUN	4
GO:0006734	NADH metabolic process	2/55	40/18670	0.00618636	0.0162834	0.0065767	TP53/VCP	2
GO:0007618	mating	2/55	40/18670	0.00618636	0.0162834	0.0065767	APP/CNR1	2
GO:0042596	fear response	2/55	40/18670	0.00618636	0.0162834	0.0065767	BCL2/DPP4	2
GO:0045823	positive regulation of heart contraction	2/55	40/18670	0.00618636	0.0162834	0.0065767	EDN1/EDN3	2
GO:0051281	positive regulation of release of sequestered calcium ion into cytosol	2/55	40/18670	0.00618636	0.0162834	0.0065767	F2/SNCA	2
GO:0051931	regulation of sensory perception	2/55	40/18670	0.00618636	0.0162834	0.0065767	EDN1/CCL3	2
GO:0071470	cellular response to osmotic stress	2/55	40/18670	0.00618636	0.0162834	0.0065767	PTGS2/CASP3	2
GO:0008016	regulation of heart contraction	4/55	251/18670	0.00635942	0.0167112	0.00674949	EDN1/EDN3/DRD2/NOS3	4
GO:0021537	telencephalon development	4/55	251/18670	0.00635942	0.0167112	0.00674949	NEFL/DRD2/CASP3/HIF1A	4
GO:0034763	negative regulation of transmembrane transport	3/55	128/18670	0.00636903	0.0167226	0.00675411	TNF/DRD2/MMP9	3
GO:0042572	retinol metabolic process	2/55	41/18670	0.00649139	0.0170018	0.00686684	ADH1C/TTR	2
GO:0090279	regulation of calcium ion import	2/55	41/18670	0.00649139	0.0170018	0.00686684	CCL3/CCL2	2
GO:1900117	regulation of execution phase of apoptosis	2/55	41/18670	0.00649139	0.0170018	0.00686684	TP53/BCL2L1	2
GO:0003206	cardiac chamber morphogenesis	3/55	129/18670	0.00650722	0.0170152	0.00687226	TP53/NOS3/HIF1A	3
GO:0071482	cellular response to light stimulus	3/55	129/18670	0.00650722	0.0170152	0.00687226	TP53/PTGS2/CASP9	3
GO:0071559	response to transforming growth factor beta	4/55	255/18670	0.00671889	0.0175542	0.00708997	COL1A1/TP53/EDN1/JUN	4
GO:0042149	cellular response to glucose starvation	2/55	42/18670	0.00680316	0.0177452	0.0071671	TP53/BCL2	2
GO:1903146	regulation of autophagy of mitochondrion	2/55	42/18670	0.00680316	0.0177452	0.0071671	TP53/HIF1A	2
GO:0006839	mitochondrial transport	4/55	256/18670	0.00681083	0.0177506	0.00716929	TP53/BCL2/STAT3/BCL2L1	4
GO:0003158	endothelium development	3/55	132/18670	0.00693253	0.0180382	0.00728544	TNF/ICAM1/VEGFA	3
GO:0042476	odontogenesis	3/55	132/18670	0.00693253	0.0180382	0.00728544	COL1A1/SERPINE1/EDN1	3
GO:0042770	signal transduction in response to DNA damage	3/55	133/18670	0.00707788	0.0184013	0.00743211	TP53/MUC1/CASP9	3
GO:0090257	regulation of muscle system process	4/55	259/18670	0.00709164	0.018422	0.00744046	SOD1/EDN1/NOS3/PTGS2	4
GO:0001953	negative regulation of cell-matrix adhesion	2/55	43/18670	0.00712162	0.0184246	0.00744151	SERPINE1/MMP12	2
GO:0010863	positive regulation of phospholipase C activity	2/55	43/18670	0.00712162	0.0184246	0.00744151	ESR1/EDNRA	2
GO:0032459	regulation of protein oligomerization	2/55	43/18670	0.00712162	0.0184246	0.00744151	MMP1/TP53	2
GO:0050850	positive regulation of calcium-mediated signaling	2/55	43/18670	0.00712162	0.0184246	0.00744151	TNF/CCL3	2
GO:0099054	presynapse assembly	2/55	43/18670	0.00712162	0.0184246	0.00744151	APP/SNCA	2
GO:0018210	peptidyl-threonine modification	3/55	134/18670	0.00722505	0.0186618	0.0075373	APP/BCL2/MAPK1	3
GO:0048565	digestive tract development	3/55	134/18670	0.00722505	0.0186618	0.0075373	TNF/BCL2/HIF1A	3
GO:0001889	liver development	3/55	135/18670	0.00737403	0.0190311	0.00768647	JUN/HMOX1/RELA	3
GO:0014002	astrocyte development	2/55	44/18670	0.00744674	0.0191255	0.00772461	TNF/APP	2
GO:0045601	regulation of endothelial cell differentiation	2/55	44/18670	0.00744674	0.0191255	0.00772461	TNF/VEGFA	2
GO:0070266	necroptotic process	2/55	44/18670	0.00744674	0.0191255	0.00772461	TNF/TP53	2
GO:0070897	transcription preinitiation complex assembly	2/55	44/18670	0.00744674	0.0191255	0.00772461	ESR1/TP53	2
GO:0090311	regulation of protein deacetylation	2/55	44/18670	0.00744674	0.0191255	0.00772461	TP53/VEGFA	2
GO:1901028	regulation of mitochondrial outer membrane permeabilization involved in apoptotic signaling pathway	2/55	44/18670	0.00744674	0.0191255	0.00772461	TP53/BCL2	2
GO:0001558	regulation of cell growth	5/55	416/18670	0.00748111	0.0191983	0.00775399	F2/TP53/EDN1/BCL2/VEGFA	5
GO:0007292	female gamete generation	3/55	136/18670	0.00752482	0.0192949	0.007793	BCL2/NOS3/PTGS2	3
GO:0046425	regulation of JAK-STAT cascade	3/55	137/18670	0.00767743	0.0196703	0.00794464	F2/TNF/STAT3	3
GO:0009100	glycoprotein metabolic process	5/55	419/18670	0.00770487	0.0197088	0.0079602	BCL2/MUC1/MMP12/VCP/HIF1A	5
GO:0043588	skin development	5/55	419/18670	0.00770487	0.0197088	0.0079602	TNF/COL1A1/BCL2/CASP3/RELA	5
GO:0032309	icosanoid secretion	2/55	45/18670	0.00777848	0.0198332	0.00801045	EDN1/DRD2	2
GO:0035987	endodermal cell differentiation	2/55	45/18670	0.00777848	0.0198332	0.00801045	MMP2/MMP9	2
GO:1900271	regulation of long-term synaptic potentiation	2/55	45/18670	0.00777848	0.0198332	0.00801045	APP/DRD2	2
GO:1900274	regulation of phospholipase C activity	2/55	45/18670	0.00777848	0.0198332	0.00801045	ESR1/EDNRA	2
GO:0061008	hepaticobiliary system development	3/55	138/18670	0.00783187	0.0199534	0.00805896	JUN/HMOX1/RELA	3
GO:1901988	negative regulation of cell cycle phase transition	4/55	267/18670	0.00787774	0.0200541	0.00809967	TP53/BCL2/CCL2/MUC1	4
GO:0006720	isoprenoid metabolic process	3/55	139/18670	0.00798814	0.0203027	0.00820003	ADH1C/TTR/CYP2C19	3
GO:0051588	regulation of neurotransmitter transport	3/55	139/18670	0.00798814	0.0203027	0.00820003	DRD2/CNR1/SNCA	3
GO:0006836	neurotransmitter transport	4/55	269/18670	0.00808287	0.0204497	0.00825941	EDN1/DRD2/CNR1/SNCA	4
GO:0001504	neurotransmitter uptake	2/55	46/18670	0.00811679	0.0204497	0.00825941	DRD2/SNCA	2
GO:0001754	eye photoreceptor cell differentiation	2/55	46/18670	0.00811679	0.0204497	0.00825941	VEGFA/STAT3	2
GO:0006984	ER-nucleus signaling pathway	2/55	46/18670	0.00811679	0.0204497	0.00825941	TP53/CCL2	2
GO:0010883	regulation of lipid storage	2/55	46/18670	0.00811679	0.0204497	0.00825941	TNF/NFKBIA	2
GO:0035196	production of miRNAs involved in gene silencing by miRNA	2/55	46/18670	0.00811679	0.0204497	0.00825941	ESR1/TP53	2
GO:0043330	response to exogenous dsRNA	2/55	46/18670	0.00811679	0.0204497	0.00825941	NFKBIA/MAPK1	2
GO:0048512	circadian behavior	2/55	46/18670	0.00811679	0.0204497	0.00825941	TP53/DRD2	2
GO:0051646	mitochondrion localization	2/55	46/18670	0.00811679	0.0204497	0.00825941	NEFL/HIF1A	2
GO:0071675	regulation of mononuclear cell migration	2/55	46/18670	0.00811679	0.0204497	0.00825941	TNF/SERPINE1	2
GO:0099172	presynapse organization	2/55	46/18670	0.00811679	0.0204497	0.00825941	APP/SNCA	2
GO:0046330	positive regulation of JNK cascade	3/55	140/18670	0.00814625	0.0204914	0.00827626	TNF/APP/EDN1	3
GO:0060078	regulation of postsynaptic membrane potential	3/55	140/18670	0.00814625	0.0204914	0.00827626	APP/DRD2/SNCA	3
GO:0045165	cell fate commitment	4/55	270/18670	0.00818675	0.020577	0.00831083	TP53/BCL2/STAT3/CASP3	4
GO:1901617	organic hydroxy compound biosynthetic process	4/55	271/18670	0.0082915	0.0208238	0.00841052	SOD1/TNF/TP53/SNCA	4
GO:1902105	regulation of leukocyte differentiation	4/55	272/18670	0.00839713	0.0210507	0.00850216	SOD1/TNF/JUN/CCL3	4
GO:0007622	rhythmic behavior	2/55	47/18670	0.00846163	0.0210507	0.00850216	TP53/DRD2	2
GO:0010799	regulation of peptidyl-threonine phosphorylation	2/55	47/18670	0.00846163	0.0210507	0.00850216	APP/MAPK1	2
GO:0031952	regulation of protein autophosphorylation	2/55	47/18670	0.00846163	0.0210507	0.00850216	JUN/VEGFA	2
GO:0042551	neuron maturation	2/55	47/18670	0.00846163	0.0210507	0.00850216	APP/BCL2	2
GO:0045058	T cell selection	2/55	47/18670	0.00846163	0.0210507	0.00850216	BCL2/STAT3	2
GO:0045646	regulation of erythrocyte differentiation	2/55	47/18670	0.00846163	0.0210507	0.00850216	STAT3/HIF1A	2
GO:0048066	developmental pigmentation	2/55	47/18670	0.00846163	0.0210507	0.00850216	BCL2/EDN3	2
GO:0061383	trabecula morphogenesis	2/55	47/18670	0.00846163	0.0210507	0.00850216	COL1A1/MMP2	2
GO:0070231	T cell apoptotic process	2/55	47/18670	0.00846163	0.0210507	0.00850216	TP53/HIF1A	2
GO:0070849	response to epidermal growth factor	2/55	47/18670	0.00846163	0.0210507	0.00850216	COL1A1/MAPK1	2
GO:0010675	regulation of cellular carbohydrate metabolic process	3/55	142/18670	0.00846799	0.0210507	0.00850216	TP53/SNCA/STAT3	3
GO:0038127	ERBB signaling pathway	3/55	142/18670	0.00846799	0.0210507	0.00850216	APP/MMP9/MAPK1	3
GO:0061448	connective tissue development	4/55	273/18670	0.00850364	0.0211228	0.00853128	COL1A1/EDN1/RELA/HIF1A	4
GO:0030534	adult behavior	3/55	144/18670	0.00879713	0.0217382	0.00877983	APP/DRD2/SNCA	3
GO:0007595	lactation	2/55	48/18670	0.00881296	0.0217382	0.00877983	VEGFA/HIF1A	2
GO:0008089	anterograde axonal transport	2/55	48/18670	0.00881296	0.0217382	0.00877983	SOD1/NEFL	2
GO:0045912	negative regulation of carbohydrate metabolic process	2/55	48/18670	0.00881296	0.0217382	0.00877983	TP53/STAT3	2
GO:0045933	positive regulation of muscle contraction	2/55	48/18670	0.00881296	0.0217382	0.00877983	EDN1/PTGS2	2
GO:0051972	regulation of telomerase activity	2/55	48/18670	0.00881296	0.0217382	0.00877983	TP53/MAPK1	2
GO:0055023	positive regulation of cardiac muscle tissue growth	2/55	48/18670	0.00881296	0.0217382	0.00877983	EDN1/MAPK1	2
GO:0101023	vascular endothelial cell proliferation	2/55	48/18670	0.00881296	0.0217382	0.00877983	CCL2/STAT3	2
GO:1905562	regulation of vascular endothelial cell proliferation	2/55	48/18670	0.00881296	0.0217382	0.00877983	CCL2/STAT3	2
GO:0001822	kidney development	4/55	278/18670	0.00904953	0.0223044	0.00900852	BCL2/MMP9/VEGFA/CASP9	4
GO:0045834	positive regulation of lipid metabolic process	3/55	146/18670	0.00913372	0.0224119	0.00905194	F2/TNF/PTGS2	3
GO:0055123	digestive system development	3/55	146/18670	0.00913372	0.0224119	0.00905194	TNF/BCL2/HIF1A	3
GO:1904892	regulation of STAT cascade	3/55	146/18670	0.00913372	0.0224119	0.00905194	F2/TNF/STAT3	3
GO:0000082	G1/S transition of mitotic cell cycle	4/55	279/18670	0.0091614	0.0224119	0.00905194	TP53/BCL2/CCL2/MUC1	4
GO:0002686	negative regulation of leukocyte migration	2/55	49/18670	0.00917075	0.0224119	0.00905194	HMOX1/CCL2	2
GO:0008347	glial cell migration	2/55	49/18670	0.00917075	0.0224119	0.00905194	CCL3/CCL2	2
GO:0030857	negative regulation of epithelial cell differentiation	2/55	49/18670	0.00917075	0.0224119	0.00905194	MMP9/VEGFA	2
GO:0032757	positive regulation of interleukin-8 production	2/55	49/18670	0.00917075	0.0224119	0.00905194	TNF/SERPINE1	2
GO:0048546	digestive tract morphogenesis	2/55	49/18670	0.00917075	0.0224119	0.00905194	BCL2/HIF1A	2
GO:0051205	protein insertion into membrane	2/55	49/18670	0.00917075	0.0224119	0.00905194	TP53/BCL2	2
GO:0097300	programmed necrotic cell death	2/55	49/18670	0.00917075	0.0224119	0.00905194	TNF/TP53	2
GO:0030522	intracellular receptor signaling pathway	4/55	280/18670	0.00927416	0.0226472	0.00914698	ESR1/NFKBIA/STAT3/RELA	4
GO:0010976	positive regulation of neuron projection development	4/55	281/18670	0.00938784	0.0229072	0.00925198	NEFL/NGFR/VEGFA/CNR1	4
GO:0008643	carbohydrate transport	3/55	148/18670	0.00947778	0.0230912	0.00932629	TNF/EDN1/EDNRA	3
GO:0035148	tube formation	3/55	148/18670	0.00947778	0.0230912	0.00932629	VEGFA/CASP3/HIF1A	3
GO:0001706	endoderm formation	2/55	50/18670	0.00953495	0.0231594	0.00935386	MMP2/MMP9	2
GO:0010171	body morphogenesis	2/55	50/18670	0.00953495	0.0231594	0.00935386	COL1A1/MMP2	2
GO:0060425	lung morphogenesis	2/55	50/18670	0.00953495	0.0231594	0.00935386	TNF/MAPK1	2
GO:1903793	positive regulation of anion transport	2/55	50/18670	0.00953495	0.0231594	0.00935386	EDN1/ABCB1	2
GO:1901990	regulation of mitotic cell cycle phase transition	5/55	444/18670	0.00975474	0.0236752	0.00956216	TP53/APP/BCL2/CCL2/MUC1	5
GO:0015980	energy derivation by oxidation of organic compounds	4/55	285/18670	0.00985163	0.0238921	0.00964977	TP53/SNCA/VCP/HIF1A	4
GO:0031050	dsRNA processing	2/55	51/18670	0.00990553	0.0239497	0.00967303	ESR1/TP53	2
GO:0048146	positive regulation of fibroblast proliferation	2/55	51/18670	0.00990553	0.0239497	0.00967303	ESR1/JUN	2
GO:0070918	production of small RNA involved in gene silencing by RNA	2/55	51/18670	0.00990553	0.0239497	0.00967303	ESR1/TP53	2
GO:2001258	negative regulation of cation channel activity	2/55	51/18670	0.00990553	0.0239497	0.00967303	DRD2/MMP9	2
GO:1903169	regulation of calcium ion transmembrane transport	3/55	151/18670	0.010008	0.0241789	0.00976562	F2/DRD2/SNCA	3
GO:0000187	activation of MAPK activity	3/55	152/18670	0.0101885	0.0245032	0.00989659	SOD1/TNF/MAPK1	3
GO:0001678	cellular glucose homeostasis	3/55	152/18670	0.0101885	0.0245032	0.00989659	ICAM1/NGFR/HIF1A	3
GO:0016202	regulation of striated muscle tissue development	3/55	152/18670	0.0101885	0.0245032	0.00989659	EDN1/BCL2/MAPK1	3
GO:0032675	regulation of interleukin-6 production	3/55	152/18670	0.0101885	0.0245032	0.00989659	TNF/APP/STAT3	3
GO:0048489	synaptic vesicle transport	3/55	152/18670	0.0101885	0.0245032	0.00989659	DRD2/CNR1/SNCA	3
GO:0097480	establishment of synaptic vesicle localization	3/55	152/18670	0.0101885	0.0245032	0.00989659	DRD2/CNR1/SNCA	3
GO:0048562	embryonic organ morphogenesis	4/55	288/18670	0.0102091	0.0245343	0.00990917	SOD1/EDN1/MAPK1/HIF1A	4
GO:0032731	positive regulation of interleukin-1 beta production	2/55	52/18670	0.0102824	0.024636	0.00995023	APP/CCL3	2
GO:0050885	neuromuscular process controlling balance	2/55	52/18670	0.0102824	0.024636	0.00995023	APP/NEFL	2
GO:0055078	sodium ion homeostasis	2/55	52/18670	0.0102824	0.024636	0.00995023	EDN1/DRD2	2
GO:0060421	positive regulation of heart growth	2/55	52/18670	0.0102824	0.024636	0.00995023	EDN1/MAPK1	2
GO:0090316	positive regulation of intracellular protein transport	3/55	153/18670	0.0103708	0.0248291	0.0100282	TP53/MAPK1/PTGS2	3
GO:0010770	positive regulation of cell morphogenesis involved in differentiation	3/55	154/18670	0.0105551	0.0252323	0.0101911	NEFL/NGFR/VEGFA	3
GO:0017156	calcium ion regulated exocytosis	3/55	154/18670	0.0105551	0.0252323	0.0101911	DRD2/CNR1/SNCA	3
GO:0031638	zymogen activation	2/55	53/18670	0.0106657	0.025325	0.0102285	PLAU/SERPINE1	2
GO:0032964	collagen biosynthetic process	2/55	53/18670	0.0106657	0.025325	0.0102285	F2/COL1A1	2
GO:0035065	regulation of histone acetylation	2/55	53/18670	0.0106657	0.025325	0.0102285	MUC1/SNCA	2
GO:0043331	response to dsRNA	2/55	53/18670	0.0106657	0.025325	0.0102285	NFKBIA/MAPK1	2
GO:0045744	negative regulation of G protein-coupled receptor signaling pathway	2/55	53/18670	0.0106657	0.025325	0.0102285	DRD2/SNCA	2
GO:0045840	positive regulation of mitotic nuclear division	2/55	53/18670	0.0106657	0.025325	0.0102285	EDN1/EDN3	2
GO:0060563	neuroepithelial cell differentiation	2/55	53/18670	0.0106657	0.025325	0.0102285	SOD1/SERPINE1	2
GO:0070228	regulation of lymphocyte apoptotic process	2/55	53/18670	0.0106657	0.025325	0.0102285	TP53/HIF1A	2
GO:1905517	macrophage migration	2/55	53/18670	0.0106657	0.025325	0.0102285	CCL3/CCL2	2
GO:0060968	regulation of gene silencing	3/55	155/18670	0.0107413	0.0254666	0.0102857	ESR1/TP53/STAT3	3
GO:1901861	regulation of muscle tissue development	3/55	155/18670	0.0107413	0.0254666	0.0102857	EDN1/BCL2/MAPK1	3
GO:0051146	striated muscle cell differentiation	4/55	293/18670	0.0108235	0.0256232	0.010349	EDN1/BCL2/VEGFA/CASP3	4
GO:0072001	renal system development	4/55	293/18670	0.0108235	0.0256232	0.010349	BCL2/MMP9/VEGFA/CASP9	4
GO:0048634	regulation of muscle organ development	3/55	156/18670	0.0109294	0.0258546	0.0104424	EDN1/BCL2/MAPK1	3
GO:0002763	positive regulation of myeloid leukocyte differentiation	2/55	54/18670	0.0110551	0.0260164	0.0105078	TNF/JUN	2
GO:0006584	catecholamine metabolic process	2/55	54/18670	0.0110551	0.0260164	0.0105078	DRD2/SNCA	2
GO:0009712	catechol-containing compound metabolic process	2/55	54/18670	0.0110551	0.0260164	0.0105078	DRD2/SNCA	2
GO:0010524	positive regulation of calcium ion transport into cytosol	2/55	54/18670	0.0110551	0.0260164	0.0105078	F2/SNCA	2
GO:0045747	positive regulation of Notch signaling pathway	2/55	54/18670	0.0110551	0.0260164	0.0105078	NOS3/STAT3	2
GO:0050994	regulation of lipid catabolic process	2/55	54/18670	0.0110551	0.0260164	0.0105078	TNF/CNR1	2
GO:0097345	mitochondrial outer membrane permeabilization	2/55	54/18670	0.0110551	0.0260164	0.0105078	TP53/BCL2	2
GO:0001764	neuron migration	3/55	157/18670	0.0111194	0.026129	0.0105532	DRD2/VEGFA/STAT3	3
GO:1905952	regulation of lipid localization	3/55	157/18670	0.0111194	0.026129	0.0105532	TNF/EDN1/NFKBIA	3
GO:0002090	regulation of receptor internalization	2/55	55/18670	0.0114508	0.026794	0.0108218	DRD2/VEGFA	2
GO:0010823	negative regulation of mitochondrion organization	2/55	55/18670	0.0114508	0.026794	0.0108218	TP53/BCL2L1	2
GO:0042306	regulation of protein import into nucleus	2/55	55/18670	0.0114508	0.026794	0.0108218	MAPK1/PTGS2	2
GO:0043030	regulation of macrophage activation	2/55	55/18670	0.0114508	0.026794	0.0108218	CCL3/SNCA	2
GO:0098900	regulation of action potential	2/55	55/18670	0.0114508	0.026794	0.0108218	CNR1/CNR2	2
GO:0002758	innate immune response-activating signal transduction	4/55	298/18670	0.0114614	0.026794	0.0108218	ESR1/MUC1/NFKBIA/RELA	4
GO:0044843	cell cycle G1/S phase transition	4/55	298/18670	0.0114614	0.026794	0.0108218	TP53/BCL2/CCL2/MUC1	4
GO:1903305	regulation of regulated secretory pathway	3/55	160/18670	0.0117009	0.0273337	0.0110398	HMOX1/DRD2/CNR1	3
GO:0006749	glutathione metabolic process	2/55	56/18670	0.0118527	0.027607	0.0111502	SOD1/GSTM1	2
GO:0006977	DNA damage response, signal transduction by p53 class mediator resulting in cell cycle arrest	2/55	56/18670	0.0118527	0.027607	0.0111502	TP53/MUC1	2
GO:0090183	regulation of kidney development	2/55	56/18670	0.0118527	0.027607	0.0111502	MMP9/VEGFA	2
GO:0098586	cellular response to virus	2/55	56/18670	0.0118527	0.027607	0.0111502	MMP12/BCL2L1	2
GO:0032635	interleukin-6 production	3/55	161/18670	0.0118986	0.0276936	0.0111852	TNF/APP/STAT3	3
GO:0042326	negative regulation of phosphorylation	5/55	468/18670	0.0120513	0.0280285	0.0113204	JUN/DRD2/SNCA/STAT3/CASP3	5
GO:0015718	monocarboxylic acid transport	3/55	162/18670	0.0120982	0.0281169	0.0113561	EDN1/DRD2/ABCC2	3
GO:0001755	neural crest cell migration	2/55	57/18670	0.0122607	0.0284115	0.0114751	EDN3/HIF1A	2
GO:0002066	columnar/cuboidal epithelial cell development	2/55	57/18670	0.0122607	0.0284115	0.0114751	SOD1/HIF1A	2
GO:0072431	signal transduction involved in mitotic G1 DNA damage checkpoint	2/55	57/18670	0.0122607	0.0284115	0.0114751	TP53/MUC1	2
GO:1902400	intracellular signal transduction involved in G1 DNA damage checkpoint	2/55	57/18670	0.0122607	0.0284115	0.0114751	TP53/MUC1	2
GO:0045931	positive regulation of mitotic cell cycle	3/55	163/18670	0.0122997	0.0284604	0.0114948	APP/EDN1/EDN3	3
GO:0097479	synaptic vesicle localization	3/55	163/18670	0.0122997	0.0284604	0.0114948	DRD2/CNR1/SNCA	3
GO:0006633	fatty acid biosynthetic process	3/55	164/18670	0.0125031	0.0289101	0.0116765	EDN1/PTGS1/PTGS2	3
GO:0017001	antibiotic catabolic process	2/55	58/18670	0.0126748	0.0292432	0.011811	SNCA/HBA2	2
GO:1903749	positive regulation of establishment of protein localization to mitochondrion	2/55	58/18670	0.0126748	0.0292432	0.011811	TP53/BCL2	2
GO:1904589	regulation of protein import	2/55	58/18670	0.0126748	0.0292432	0.011811	MAPK1/PTGS2	2
GO:0007093	mitotic cell cycle checkpoint	3/55	165/18670	0.0127085	0.0292784	0.0118252	TP53/MUC1/BCL2L1	3
GO:0050680	negative regulation of epithelial cell proliferation	3/55	165/18670	0.0127085	0.0292784	0.0118252	TNF/NGFR/CCL2	3
GO:0001658	branching involved in ureteric bud morphogenesis	2/55	59/18670	0.013095	0.0299516	0.0120971	BCL2/VEGFA	2
GO:0010518	positive regulation of phospholipase activity	2/55	59/18670	0.013095	0.0299516	0.0120971	ESR1/EDNRA	2
GO:0010656	negative regulation of muscle cell apoptotic process	2/55	59/18670	0.013095	0.0299516	0.0120971	EDN1/HMOX1	2
GO:0032732	positive regulation of interleukin-1 production	2/55	59/18670	0.013095	0.0299516	0.0120971	APP/CCL3	2
GO:0032890	regulation of organic acid transport	2/55	59/18670	0.013095	0.0299516	0.0120971	EDN1/SNCA	2
GO:0045824	negative regulation of innate immune response	2/55	59/18670	0.013095	0.0299516	0.0120971	DRD2/MMP12	2
GO:0072413	signal transduction involved in mitotic cell cycle checkpoint	2/55	59/18670	0.013095	0.0299516	0.0120971	TP53/MUC1	2
GO:1902402	signal transduction involved in mitotic DNA damage checkpoint	2/55	59/18670	0.013095	0.0299516	0.0120971	TP53/MUC1	2
GO:1902403	signal transduction involved in mitotic DNA integrity checkpoint	2/55	59/18670	0.013095	0.0299516	0.0120971	TP53/MUC1	2
GO:2000756	regulation of peptidyl-lysine acetylation	2/55	59/18670	0.013095	0.0299516	0.0120971	MUC1/SNCA	2
GO:0033209	tumor necrosis factor-mediated signaling pathway	3/55	167/18670	0.0131251	0.0299773	0.0121075	TNF/NFKBIA/RELA	3
GO:0035051	cardiocyte differentiation	3/55	167/18670	0.0131251	0.0299773	0.0121075	EDN1/VEGFA/MAPK1	3
GO:0043087	regulation of GTPase activity	5/55	479/18670	0.0132179	0.0301675	0.0121843	SOD1/ICAM1/JUN/CCL3/CCL2	5
GO:1901987	regulation of cell cycle phase transition	5/55	480/18670	0.0133276	0.0303941	0.0122759	TP53/APP/BCL2/CCL2/MUC1	5
GO:0051302	regulation of cell division	3/55	168/18670	0.0133363	0.0303941	0.0122759	DRD2/VEGFA/BCL2L1	3
GO:1902110	positive regulation of mitochondrial membrane permeability involved in apoptotic process	2/55	60/18670	0.0135212	0.0307695	0.0124275	TP53/BCL2	2
GO:0007269	neurotransmitter secretion	3/55	169/18670	0.0135494	0.0307695	0.0124275	DRD2/CNR1/SNCA	3
GO:0038095	Fc-epsilon receptor signaling pathway	3/55	169/18670	0.0135494	0.0307695	0.0124275	JUN/MAPK1/RELA	3
GO:0050728	negative regulation of inflammatory response	3/55	169/18670	0.0135494	0.0307695	0.0124275	SOD1/F2/CNR2	3
GO:0051100	negative regulation of binding	3/55	169/18670	0.0135494	0.0307695	0.0124275	JUN/HMOX1/NFKBIA	3
GO:0050863	regulation of T cell activation	4/55	314/18670	0.0136645	0.0310087	0.0125241	SOD1/CCL2/DPP4/CASP3	4
GO:0043433	negative regulation of DNA-binding transcription factor activity	3/55	170/18670	0.0137645	0.031191	0.0125977	ESR1/HMOX1/NFKBIA	3
GO:0099643	signal release from synapse	3/55	170/18670	0.0137645	0.031191	0.0125977	DRD2/CNR1/SNCA	3
GO:0043312	neutrophil degranulation	5/55	485/18670	0.0138855	0.0314204	0.0126904	PLAU/TTR/MMP9/MAPK1/VCP	5
GO:0051249	regulation of lymphocyte activation	5/55	485/18670	0.0138855	0.0314204	0.0126904	SOD1/BCL2/CCL2/DPP4/CASP3	5
GO:0030888	regulation of B cell proliferation	2/55	61/18670	0.0139534	0.0315031	0.0127238	BCL2/CASP3	2
GO:0032370	positive regulation of lipid transport	2/55	61/18670	0.0139534	0.0315031	0.0127238	EDN1/NFKBIA	2
GO:1905953	negative regulation of lipid localization	2/55	61/18670	0.0139534	0.0315031	0.0127238	TNF/NFKBIA	2
GO:0003205	cardiac chamber development	3/55	171/18670	0.0139815	0.0315031	0.0127238	TP53/NOS3/HIF1A	3
GO:0006937	regulation of muscle contraction	3/55	171/18670	0.0139815	0.0315031	0.0127238	SOD1/EDN1/PTGS2	3
GO:0043901	negative regulation of multi-organism process	3/55	171/18670	0.0139815	0.0315031	0.0127238	TNF/JUN/CCL3	3
GO:0021543	pallium development	3/55	172/18670	0.0142005	0.0319738	0.0129139	NEFL/CASP3/HIF1A	3
GO:0002283	neutrophil activation involved in immune response	5/55	488/18670	0.0142277	0.0320124	0.0129295	PLAU/TTR/MMP9/MAPK1/VCP	5
GO:0002753	cytoplasmic pattern recognition receptor signaling pathway	2/55	62/18670	0.0143915	0.0322439	0.013023	NFKBIA/RELA	2
GO:0007585	respiratory gaseous exchange	2/55	62/18670	0.0143915	0.0322439	0.013023	EDN1/EDNRA	2
GO:0032922	circadian regulation of gene expression	2/55	62/18670	0.0143915	0.0322439	0.013023	NGFR/DRD2	2
GO:0055025	positive regulation of cardiac muscle tissue development	2/55	62/18670	0.0143915	0.0322439	0.013023	EDN1/MAPK1	2
GO:0070265	necrotic cell death	2/55	62/18670	0.0143915	0.0322439	0.013023	TNF/TP53	2
GO:1902686	mitochondrial outer membrane permeabilization involved in programmed cell death	2/55	62/18670	0.0143915	0.0322439	0.013023	TP53/BCL2	2
GO:0002218	activation of innate immune response	4/55	319/18670	0.0144046	0.0322505	0.0130257	ESR1/MUC1/NFKBIA/RELA	4
GO:0055002	striated muscle cell development	3/55	173/18670	0.0144214	0.0322655	0.0130317	EDN1/BCL2/VEGFA	3
GO:0031571	mitotic G1 DNA damage checkpoint	2/55	63/18670	0.0148356	0.0330988	0.0133683	TP53/MUC1	2
GO:0044819	mitotic G1/S transition checkpoint	2/55	63/18670	0.0148356	0.0330988	0.0133683	TP53/MUC1	2
GO:0046530	photoreceptor cell differentiation	2/55	63/18670	0.0148356	0.0330988	0.0133683	VEGFA/STAT3	2
GO:0046622	positive regulation of organ growth	2/55	63/18670	0.0148356	0.0330988	0.0133683	EDN1/MAPK1	2
GO:0046165	alcohol biosynthetic process	3/55	175/18670	0.0148692	0.0331505	0.0133891	SOD1/TNF/SNCA	3
GO:0035794	positive regulation of mitochondrial membrane permeability	2/55	64/18670	0.0152855	0.0339595	0.0137159	TP53/BCL2	2
GO:0044783	G1 DNA damage checkpoint	2/55	64/18670	0.0152855	0.0339595	0.0137159	TP53/MUC1	2
GO:0045670	regulation of osteoclast differentiation	2/55	64/18670	0.0152855	0.0339595	0.0137159	TNF/CCL3	2
GO:0046782	regulation of viral transcription	2/55	64/18670	0.0152855	0.0339595	0.0137159	JUN/CCL3	2
GO:0048247	lymphocyte chemotaxis	2/55	64/18670	0.0152855	0.0339595	0.0137159	CCL3/CCL2	2
GO:0007416	synapse assembly	3/55	177/18670	0.0153248	0.0340229	0.0137415	APP/DRD2/SNCA	3
GO:0042119	neutrophil activation	5/55	498/18670	0.0154097	0.0341875	0.013808	PLAU/TTR/MMP9/MAPK1/VCP	5
GO:0014823	response to activity	2/55	65/18670	0.0157413	0.0348745	0.0140855	EDN1/HIF1A	2
GO:0060675	ureteric bud morphogenesis	2/55	65/18670	0.0157413	0.0348745	0.0140855	BCL2/VEGFA	2
GO:1901796	regulation of signal transduction by p53 class mediator	3/55	180/18670	0.0160229	0.035449	0.0143175	TP53/BCL2/MUC1	3
GO:1905330	regulation of morphogenesis of an epithelium	3/55	180/18670	0.0160229	0.035449	0.0143175	TNF/ESR1/VEGFA	3
GO:0046888	negative regulation of hormone secretion	2/55	66/18670	0.0162029	0.0357228	0.0144281	EDN1/DRD2	2
GO:0051785	positive regulation of nuclear division	2/55	66/18670	0.0162029	0.0357228	0.0144281	EDN1/EDN3	2
GO:0072171	mesonephric tubule morphogenesis	2/55	66/18670	0.0162029	0.0357228	0.0144281	BCL2/VEGFA	2
GO:1902108	regulation of mitochondrial membrane permeability involved in apoptotic process	2/55	66/18670	0.0162029	0.0357228	0.0144281	TP53/BCL2	2
GO:1905710	positive regulation of membrane permeability	2/55	66/18670	0.0162029	0.0357228	0.0144281	TP53/BCL2	2
GO:0002285	lymphocyte activation involved in immune response	3/55	181/18670	0.0162595	0.035798	0.0144585	TP53/ICAM1/STAT3	3
GO:0010565	regulation of cellular ketone metabolic process	3/55	181/18670	0.0162595	0.035798	0.0144585	CNR1/PTGS2/SNCA	3
GO:0015849	organic acid transport	4/55	333/18670	0.0166112	0.0365216	0.0147507	EDN1/DRD2/SNCA/ABCC2	4
GO:0046942	carboxylic acid transport	4/55	333/18670	0.0166112	0.0365216	0.0147507	EDN1/DRD2/SNCA/ABCC2	4
GO:0019748	secondary metabolic process	2/55	67/18670	0.0166702	0.0366007	0.0147827	BCL2/ABCC2	2
GO:0048747	muscle fiber development	2/55	67/18670	0.0166702	0.0366007	0.0147827	BCL2/VEGFA	2
GO:0050770	regulation of axonogenesis	3/55	183/18670	0.0167387	0.0367258	0.0148332	NEFL/NGFR/VEGFA	3
GO:0016239	positive regulation of macroautophagy	2/55	68/18670	0.0171433	0.0375098	0.0151498	HMOX1/HIF1A	2
GO:0019915	lipid storage	2/55	68/18670	0.0171433	0.0375098	0.0151498	TNF/NFKBIA	2
GO:0035924	cellular response to vascular endothelial growth factor stimulus	2/55	68/18670	0.0171433	0.0375098	0.0151498	VEGFA/RELA	2
GO:0071242	cellular response to ammonium ion	2/55	68/18670	0.0171433	0.0375098	0.0151498	MAPK1/CASP3	2
GO:0007369	gastrulation	3/55	185/18670	0.0172258	0.0376385	0.0152018	TP53/MMP2/MMP9	3
GO:0046328	regulation of JNK cascade	3/55	185/18670	0.0172258	0.0376385	0.0152018	TNF/APP/EDN1	3
GO:0055001	muscle cell development	3/55	186/18670	0.0174723	0.0381509	0.0154088	EDN1/BCL2/VEGFA	3
GO:0070227	lymphocyte apoptotic process	2/55	69/18670	0.0176221	0.0384514	0.0155301	TP53/HIF1A	2
GO:0042440	pigment metabolic process	2/55	71/18670	0.0185965	0.0404666	0.016344	HMOX1/BCL2	2
GO:0042531	positive regulation of tyrosine phosphorylation of STAT protein	2/55	71/18670	0.0185965	0.0404666	0.016344	TNF/STAT3	2
GO:0071479	cellular response to ionizing radiation	2/55	71/18670	0.0185965	0.0404666	0.016344	TP53/BCL2L1	2
GO:1904427	positive regulation of calcium ion transmembrane transport	2/55	71/18670	0.0185965	0.0404666	0.016344	F2/SNCA	2
GO:0002532	production of molecular mediator involved in inflammatory response	2/55	72/18670	0.0190922	0.0414315	0.0167338	F2/SERPINE1	2
GO:0051155	positive regulation of striated muscle cell differentiation	2/55	72/18670	0.0190922	0.0414315	0.0167338	EDN1/BCL2	2
GO:0060193	positive regulation of lipase activity	2/55	72/18670	0.0190922	0.0414315	0.0167338	ESR1/EDNRA	2
GO:1903747	regulation of establishment of protein localization to mitochondrion	2/55	72/18670	0.0190922	0.0414315	0.0167338	TP53/BCL2	2
GO:0045333	cellular respiration	3/55	193/18670	0.0192534	0.0417529	0.0168636	SNCA/VCP/HIF1A	3
GO:0099504	synaptic vesicle cycle	3/55	194/18670	0.0195158	0.0422881	0.0170797	DRD2/CNR1/SNCA	3
GO:0031100	animal organ regeneration	2/55	73/18670	0.0195933	0.0422881	0.0170797	F7/HMOX1	2
GO:0033555	multicellular organismal response to stress	2/55	73/18670	0.0195933	0.0422881	0.0170797	BCL2/DPP4	2
GO:0045685	regulation of glial cell differentiation	2/55	73/18670	0.0195933	0.0422881	0.0170797	F2/RELA	2
GO:0072401	signal transduction involved in DNA integrity checkpoint	2/55	73/18670	0.0195933	0.0422881	0.0170797	TP53/MUC1	2
GO:0072422	signal transduction involved in DNA damage checkpoint	2/55	73/18670	0.0195933	0.0422881	0.0170797	TP53/MUC1	2
GO:1901983	regulation of protein acetylation	2/55	73/18670	0.0195933	0.0422881	0.0170797	MUC1/SNCA	2
GO:1902903	regulation of supramolecular fiber organization	4/55	352/18670	0.0199303	0.0429861	0.0173617	APP/EDN1/ICAM1/SNCA	4
GO:0071897	DNA biosynthetic process	3/55	196/18670	0.0200465	0.0432055	0.0174503	TP53/MAPK1/VCP	3
GO:0032677	regulation of interleukin-8 production	2/55	74/18670	0.0201	0.0432055	0.0174503	TNF/SERPINE1	2
GO:0043507	positive regulation of JUN kinase activity	2/55	74/18670	0.0201	0.0432055	0.0174503	TNF/EDN1	2
GO:0072078	nephron tubule morphogenesis	2/55	74/18670	0.0201	0.0432055	0.0174503	BCL2/VEGFA	2
GO:0072395	signal transduction involved in cell cycle checkpoint	2/55	74/18670	0.0201	0.0432055	0.0174503	TP53/MUC1	2
GO:0030098	lymphocyte differentiation	4/55	353/18670	0.0201155	0.0432097	0.0174519	SOD1/TP53/BCL2/STAT3	4
GO:0002221	pattern recognition receptor signaling pathway	3/55	197/18670	0.0203148	0.0435787	0.017601	ESR1/NFKBIA/RELA	3
GO:0009749	response to glucose	3/55	197/18670	0.0203148	0.0435787	0.017601	ICAM1/CASP3/HIF1A	3
GO:0046890	regulation of lipid biosynthetic process	3/55	198/18670	0.0205851	0.0440976	0.0178106	SOD1/TNF/PTGS2	3
GO:0072376	protein activation cascade	3/55	198/18670	0.0205851	0.0440976	0.0178106	F2/F10/F7	3
GO:1902117	positive regulation of organelle assembly	2/55	75/18670	0.0206122	0.0440976	0.0178106	TNF/EDN1	2
GO:1903201	regulation of oxidative stress-induced cell death	2/55	75/18670	0.0206122	0.0440976	0.0178106	SOD1/HIF1A	2
GO:0006959	humoral immune response	4/55	356/18670	0.0206777	0.044208	0.0178552	F2/TNF/BCL2/CCL2	4
GO:0000422	autophagy of mitochondrion	2/55	76/18670	0.0211298	0.0449929	0.0181722	TP53/HIF1A	2
GO:0007492	endoderm development	2/55	76/18670	0.0211298	0.0449929	0.0181722	MMP2/MMP9	2
GO:0030500	regulation of bone mineralization	2/55	76/18670	0.0211298	0.0449929	0.0181722	CCL3/HIF1A	2
GO:0060411	cardiac septum morphogenesis	2/55	76/18670	0.0211298	0.0449929	0.0181722	TP53/NOS3	2
GO:0061726	mitochondrion disassembly	2/55	76/18670	0.0211298	0.0449929	0.0181722	TP53/HIF1A	2
GO:0072088	nephron epithelium morphogenesis	2/55	76/18670	0.0211298	0.0449929	0.0181722	BCL2/VEGFA	2
GO:0010948	negative regulation of cell cycle process	4/55	361/18670	0.0216361	0.046014	0.0185846	TP53/BCL2/CCL2/MUC1	4
GO:0016575	histone deacetylation	2/55	77/18670	0.0216528	0.046014	0.0185846	TP53/VEGFA	2
GO:0032481	positive regulation of type I interferon production	2/55	77/18670	0.0216528	0.046014	0.0185846	MMP12/RELA	2
GO:0030111	regulation of Wnt signaling pathway	4/55	363/18670	0.022027	0.0467779	0.0188931	COL1A1/ESR1/APP/VCP	4
GO:0032413	negative regulation of ion transmembrane transporter activity	2/55	78/18670	0.0221812	0.0469485	0.018962	DRD2/MMP9	2
GO:0055021	regulation of cardiac muscle tissue growth	2/55	78/18670	0.0221812	0.0469485	0.018962	EDN1/MAPK1	2
GO:0061333	renal tubule morphogenesis	2/55	78/18670	0.0221812	0.0469485	0.018962	BCL2/VEGFA	2
GO:0072028	nephron morphogenesis	2/55	78/18670	0.0221812	0.0469485	0.018962	BCL2/VEGFA	2
GO:2000300	regulation of synaptic vesicle exocytosis	2/55	78/18670	0.0221812	0.0469485	0.018962	DRD2/CNR1	2
GO:1902905	positive regulation of supramolecular fiber organization	3/55	204/18670	0.0222489	0.0470603	0.0190072	APP/EDN1/ICAM1	3
GO:0071260	cellular response to mechanical stimulus	2/55	79/18670	0.0227149	0.0480142	0.0193924	COL1A1/PTGS2	2
GO:0048193	Golgi vesicle transport	4/55	368/18670	0.0230233	0.0486336	0.0196426	F2/F10/F7/VCP	4
GO:0099003	vesicle-mediated transport in synapse	3/55	207/18670	0.0231076	0.0487793	0.0197015	DRD2/CNR1/SNCA	3
GO:0006909	phagocytosis	4/55	369/18670	0.0232258	0.0489962	0.0197891	SOD1/TNF/CCL2/MAPK1	4
GO:0070509	calcium ion import	2/55	80/18670	0.0232539	0.0490231	0.0197999	CCL3/CCL2	2
GO:0032535	regulation of cellular component size	4/55	370/18670	0.0234294	0.0493601	0.0199361	EDN1/ICAM1/NEFL/VEGFA	4
GO:0051701	interaction with host	3/55	209/18670	0.0236901	0.0498763	0.0201445	ICAM1/DPP4/BCL2L1	3
GO:0007045	cell-substrate adherens junction assembly	2/55	81/18670	0.0237982	0.0499386	0.0201697	BCL2/VEGFA	2
GO:0014855	striated muscle cell proliferation	2/55	81/18670	0.0237982	0.0499386	0.0201697	MAPK1/STAT3	2
GO:0021766	hippocampus development	2/55	81/18670	0.0237982	0.0499386	0.0201697	NEFL/CASP3	2
GO:0048041	focal adhesion assembly	2/55	81/18670	0.0237982	0.0499386	0.0201697	BCL2/VEGFA	2
GO:0110110	positive regulation of animal organ morphogenesis	2/55	81/18670	0.0237982	0.0499386	0.0201697	EDN1/VEGFA	2
GO:0006790	sulfur compound metabolic process	4/55	372/18670	0.0238399	0.0499929	0.0201916	SOD1/GSTM1/SNCA/ABCC2	4

## Sheet: CC-47
Supplementary Table S6 | The CC items of GO enrichment analysis for the 55 common targets
ID	Description	GeneRatio	BgRatio	pvalue	p.adjust	qvalue	GeneID	Count
GO:0045121	membrane raft	10/55	315/19717	1.45434e-08	1.50725e-06	9.42969e-07	TNF/APP/ICAM1/HMOX1/CNR1/DPP4/MAPK1/NOS3/PTGS2/CASP3	10
GO:0098857	membrane microdomain	10/55	316/19717	1.49872e-08	1.50725e-06	9.42969e-07	TNF/APP/ICAM1/HMOX1/CNR1/DPP4/MAPK1/NOS3/PTGS2/CASP3	10
GO:0098589	membrane region	10/55	328/19717	2.13291e-08	1.50725e-06	9.42969e-07	TNF/APP/ICAM1/HMOX1/CNR1/DPP4/MAPK1/NOS3/PTGS2/CASP3	10
GO:0005796	Golgi lumen	5/55	102/19717	9.50958e-06	0.000504008	0.000315318	F2/F10/APP/F7/MUC1	5
GO:0005788	endoplasmic reticulum lumen	7/55	309/19717	2.3106e-05	0.000979695	0.000612917	F2/F10/COL1A1/APP/EDN1/F7/PTGS2	7
GO:0060205	cytoplasmic vesicle lumen	7/55	338/19717	4.09319e-05	0.00126308	0.000790211	TTR/APP/SERPINE1/VEGFA/MAPK1/VCP/HBA2	7
GO:0031983	vesicle lumen	7/55	339/19717	4.17056e-05	0.00126308	0.000790211	TTR/APP/SERPINE1/VEGFA/MAPK1/VCP/HBA2	7
GO:0005901	caveola	4/55	80/19717	7.32198e-05	0.00170742	0.00106819	HMOX1/MAPK1/NOS3/PTGS2	4
GO:0000790	nuclear chromatin	7/55	377/19717	8.14006e-05	0.00170742	0.00106819	ESR1/TP53/JUN/MUC1/STAT3/RELA/HIF1A	7
GO:0033267	axon part	7/55	382/19717	8.83805e-05	0.00170742	0.00106819	SOD1/APP/NEFL/DRD2/CNR1/SNCA/HIF1A	7
GO:0120111	neuron projection cytoplasm	4/55	84/19717	8.85923e-05	0.00170742	0.00106819	SOD1/NEFL/MAPK1/HIF1A	4
GO:0031091	platelet alpha granule	4/55	91/19717	0.000120954	0.00210433	0.00131651	APP/SERPINE1/VEGFA/SNCA	4
GO:0062023	collagen-containing extracellular matrix	7/55	406/19717	0.000129039	0.00210433	0.00131651	F2/COL1A1/SERPINE1/ICAM1/MMP2/F7/MMP9	7
GO:0044853	plasma membrane raft	4/55	109/19717	0.000242595	0.00367358	0.00229827	HMOX1/MAPK1/NOS3/PTGS2	4
GO:0034774	secretory granule lumen	6/55	321/19717	0.000263309	0.00372143	0.00232821	TTR/APP/SERPINE1/VEGFA/MAPK1/VCP	6
GO:0043025	neuronal cell body	7/55	497/19717	0.000441689	0.00585238	0.00366137	SOD1/APP/DRD2/MAPK1/CNR2/SNCA/CASP3	7
GO:0043204	perikaryon	4/55	134/19717	0.00053183	0.00636191	0.00398014	APP/DRD2/MAPK1/CNR2	4
GO:1904115	axon cytoplasm	3/55	57/19717	0.000540162	0.00636191	0.00398014	SOD1/NEFL/HIF1A	3
GO:0031093	platelet alpha granule lumen	3/55	67/19717	0.000867117	0.00967521	0.00605301	APP/SERPINE1/VEGFA	3
GO:0090575	RNA polymerase II transcription factor complex	4/55	163/19717	0.00110588	0.0117223	0.00733371	TP53/JUN/STAT3/HIF1A	4
GO:0150034	distal axon	5/55	285/19717	0.00117428	0.0118546	0.00741648	APP/NEFL/DRD2/CNR1/SNCA	5
GO:0030426	growth cone	4/55	171/19717	0.00131995	0.0127195	0.0079576	APP/NEFL/CNR1/SNCA	4
GO:0030427	site of polarized growth	4/55	176/19717	0.00146758	0.0131983	0.00825711	APP/NEFL/CNR1/SNCA	4
GO:0005741	mitochondrial outer membrane	4/55	178/19717	0.00152973	0.0131983	0.00825711	BCL2/CNR1/SNCA/BCL2L1	4
GO:0098685	Schaffer collateral - CA1 synapse	3/55	82/19717	0.0015564	0.0131983	0.00825711	NEFL/NEFH/STAT3	3
GO:0005791	rough endoplasmic reticulum	3/55	85/19717	0.00172563	0.0140705	0.00880282	APP/EDN1/SNCA	3
GO:0031970	organelle envelope lumen	3/55	88/19717	0.00190595	0.0149653	0.00936258	SOD1/APP/SNCA	3
GO:0008021	synaptic vesicle	4/55	191/19717	0.00197917	0.0149852	0.00937503	APP/DRD2/SNCA/BCL2L1	4
GO:0035578	azurophil granule lumen	3/55	91/19717	0.00209762	0.0153343	0.00959348	TTR/MAPK1/VCP	3
GO:0031968	organelle outer membrane	4/55	201/19717	0.00238182	0.0158148	0.00989406	BCL2/CNR1/SNCA/BCL2L1	4
GO:0044798	nuclear transcription factor complex	4/55	201/19717	0.00238182	0.0158148	0.00989406	TP53/JUN/STAT3/HIF1A	4
GO:0098793	presynapse	6/55	491/19717	0.00238714	0.0158148	0.00989406	APP/NEFL/DRD2/CNR1/SNCA/BCL2L1	6
GO:0019867	outer membrane	4/55	203/19717	0.00246863	0.0158591	0.00992177	BCL2/CNR1/SNCA/BCL2L1	4
GO:0070382	exocytic vesicle	4/55	207/19717	0.00264875	0.0163249	0.0102132	APP/DRD2/SNCA/BCL2L1	4
GO:0032838	plasma membrane bounded cell projection cytoplasm	4/55	208/19717	0.00269515	0.0163249	0.0102132	SOD1/NEFL/MAPK1/HIF1A	4
GO:0098978	glutamatergic synapse	5/55	349/19717	0.00284513	0.0167546	0.010482	DRD2/CNR1/STAT3/VCP/RELA	5
GO:0030672	synaptic vesicle membrane	3/55	104/19717	0.0030651	0.0171	0.0106981	DRD2/SNCA/BCL2L1	3
GO:0099501	exocytic vesicle membrane	3/55	104/19717	0.0030651	0.0171	0.0106981	DRD2/SNCA/BCL2L1	3
GO:0005667	transcription factor complex	5/55	365/19717	0.00344674	0.0187361	0.0117217	TP53/JUN/STAT3/RELA/HIF1A	5
GO:0032839	dendrite cytoplasm	2/55	32/19717	0.00359146	0.0190347	0.0119085	SOD1/MAPK1	2
GO:0045177	apical part of cell	5/55	384/19717	0.00427453	0.0221025	0.0138278	APP/ABCB1/MUC1/DPP4/ABCC2	5
GO:0030133	transport vesicle	5/55	392/19717	0.00466243	0.0232343	0.0145359	APP/EDN1/DRD2/SNCA/BCL2L1	5
GO:0009897	external side of plasma membrane	5/55	393/19717	0.00471263	0.0232343	0.0145359	F2/F10/TNF/ICAM1/ECE1	5
GO:1904813	ficolin-1-rich granule lumen	3/55	124/19717	0.0050193	0.0241839	0.0151299	MMP9/MAPK1/VCP	3
GO:0005766	primary lysosome	3/55	155/19717	0.0092724	0.0427337	0.0267351	TTR/MAPK1/VCP	3
GO:0042582	azurophil granule	3/55	155/19717	0.0092724	0.0427337	0.0267351	TTR/MAPK1/VCP	3
GO:0030139	endocytic vesicle	4/55	303/19717	0.0100852	0.0454909	0.02846	DRD2/DPP4/NOS3/HBA2	4

## Sheet: MF-64
Supplementary Table S6 | The MF items of GO enrichment analysis for the 55 common targets
ID	Description	GeneRatio	BgRatio	pvalue	p.adjust	qvalue	GeneID	Count
GO:0002020	protease binding	8/55	128/17697	5.50004e-09	8.19466e-07	4.85587e-07	TNF/COL1A1/TP53/SERPINE1/BCL2/DPP4/CASP3/VCP	8
GO:0004175	endopeptidase activity	12/55	427/17697	5.73053e-09	8.19466e-07	4.85587e-07	F2/F10/PLAU/MMP1/MMP2/F7/MMP9/DPP4/MMP12/CASP3/ECE1/CASP9	12
GO:0004252	serine-type endopeptidase activity	8/55	160/17697	3.17973e-08	3.03134e-06	1.79627e-06	F2/F10/PLAU/MMP1/MMP2/F7/MMP9/DPP4	8
GO:0008236	serine-type peptidase activity	8/55	182/17697	8.64571e-08	5.84903e-06	3.46593e-06	F2/F10/PLAU/MMP1/MMP2/F7/MMP9/DPP4	8
GO:0017171	serine hydrolase activity	8/55	186/17697	1.02256e-07	5.84903e-06	3.46593e-06	F2/F10/PLAU/MMP1/MMP2/F7/MMP9/DPP4	8
GO:0031625	ubiquitin protein ligase binding	8/55	290/17697	2.94758e-06	0.000140501	8.32562e-05	TP53/JUN/NGFR/BCL2/NFKBIA/VCP/RELA/HIF1A	8
GO:0020037	heme binding	6/55	135/17697	3.75959e-06	0.000153606	9.10217e-05	HMOX1/PTGS1/NOS3/CYP2C19/PTGS2/HBA2	6
GO:0044389	ubiquitin-like protein ligase binding	8/55	308/17697	4.59825e-06	0.000164387	9.74103e-05	TP53/JUN/NGFR/BCL2/NFKBIA/VCP/RELA/HIF1A	8
GO:0046906	tetrapyrrole binding	6/55	145/17697	5.68125e-06	0.000180538	0.00010698	HMOX1/PTGS1/NOS3/CYP2C19/PTGS2/HBA2	6
GO:0004222	metalloendopeptidase activity	5/55	103/17697	1.67229e-05	0.000478275	0.000283409	MMP1/MMP2/MMP9/MMP12/ECE1	5
GO:0019902	phosphatase binding	6/55	185/17697	2.27998e-05	0.000592795	0.00035127	SOD1/TP53/BCL2/MAPK1/STAT3/VCP	6
GO:0019903	protein phosphatase binding	5/55	140/17697	7.30139e-05	0.00174016	0.00103116	SOD1/TP53/BCL2/STAT3/VCP	5
GO:0048018	receptor ligand activity	8/55	482/17697	0.000112997	0.00248593	0.00147308	F2/TNF/TTR/EDN1/CCL3/CCL2/EDN3/VEGFA	8
GO:0016705	oxidoreductase activity, acting on paired donors, with incorporation or reduction of molecular oxygen	5/55	159/17697	0.000133088	0.00271881	0.00161107	HMOX1/PTGS1/NOS3/CYP2C19/PTGS2	5
GO:0016209	antioxidant activity	4/55	86/17697	0.000146758	0.00279818	0.00165811	SOD1/PTGS1/PTGS2/HBA2	4
GO:0008237	metallopeptidase activity	5/55	181/17697	0.000243491	0.00424118	0.00251318	MMP1/MMP2/MMP9/MMP12/ECE1	5
GO:0005126	cytokine receptor binding	6/55	286/17697	0.000252098	0.00424118	0.00251318	TNF/CCL3/CCL2/VEGFA/STAT3/CASP3	6
GO:0048020	CCR chemokine receptor binding	3/55	43/17697	0.000320998	0.00510031	0.00302226	CCL3/CCL2/STAT3	3
GO:0051400	BH domain binding	2/55	10/17697	0.000420005	0.00600608	0.00355899	BCL2/BCL2L1	2
GO:0070513	death domain binding	2/55	10/17697	0.000420005	0.00600608	0.00355899	BCL2/BCL2L1	2
GO:0099186	structural constituent of postsynapse	2/55	11/17697	0.000512316	0.00697726	0.00413448	NEFL/NEFH	2
GO:0004601	peroxidase activity	3/55	52/17697	0.000563585	0.00731152	0.00433256	PTGS1/PTGS2/HBA2	3
GO:0005125	cytokine activity	5/55	220/17697	0.000595347	0.00731152	0.00433256	TNF/EDN1/CCL3/CCL2/VEGFA	5
GO:0016004	phospholipase activator activity	2/55	12/17697	0.000613554	0.00731152	0.00433256	CCL3/CASP3	2
GO:0016684	oxidoreductase activity, acting on peroxide as acceptor	3/55	56/17697	0.000700725	0.00796031	0.00471701	PTGS1/PTGS2/HBA2	3
GO:0042910	xenobiotic transmembrane transporter activity	2/55	13/17697	0.000723665	0.00796031	0.00471701	ABCB1/ABCC2	2
GO:0005507	copper ion binding	3/55	59/17697	0.000816393	0.00860649	0.00509991	SOD1/TP53/SNCA	3
GO:0060229	lipase activator activity	2/55	14/17697	0.000842594	0.00860649	0.00509991	CCL3/CASP3	2
GO:0097153	cysteine-type endopeptidase activity involved in apoptotic process	2/55	15/17697	0.000970287	0.00956904	0.00567028	CASP3/CASP9	2
GO:0043274	phospholipase binding	2/55	16/17697	0.00110669	0.0101142	0.00599332	NEFL/SNCA	2
GO:0002039	p53 binding	3/55	66/17697	0.00113166	0.0101142	0.00599332	TP53/MUC1/HIF1A	3
GO:0042379	chemokine receptor binding	3/55	66/17697	0.00113166	0.0101142	0.00599332	CCL3/CCL2/STAT3	3
GO:0098918	structural constituent of synapse	2/55	17/17697	0.00125175	0.0108485	0.00642846	NEFL/NEFH	2
GO:0001085	RNA polymerase II transcription factor binding	4/55	155/17697	0.00136446	0.0114775	0.00680117	ESR1/TP53/JUN/STAT3	4
GO:0001091	RNA polymerase II basal transcription factor binding	2/55	20/17697	0.00173835	0.0138587	0.0082122	ESR1/TP53	2
GO:0001664	G protein-coupled receptor binding	5/55	280/17697	0.00174446	0.0138587	0.0082122	EDN1/CCL3/CCL2/EDN3/STAT3	5
GO:0070840	dynein complex binding	2/55	21/17697	0.00191751	0.0148219	0.00878293	NEFH/SNCA	2
GO:0001223	transcription coactivator binding	2/55	23/17697	0.00230097	0.0171351	0.0101537	ESR1/RELA	2
GO:0001228	DNA-binding transcription activator activity, RNA polymerase II-specific	6/55	439/17697	0.00233661	0.0171351	0.0101537	ESR1/TP53/JUN/STAT3/RELA/HIF1A	6
GO:0000980	RNA polymerase II distal enhancer sequence-specific DNA binding	3/55	99/17697	0.00360871	0.0248457	0.0147227	TP53/JUN/RELA	3
GO:0035035	histone acetyltransferase binding	2/55	29/17697	0.00364866	0.0248457	0.0147227	TP53/HIF1A	2
GO:0051059	NF-kappaB binding	2/55	29/17697	0.00364866	0.0248457	0.0147227	NFKBIA/RELA	2
GO:0051721	protein phosphatase 2A binding	2/55	32/17697	0.00443099	0.0288014	0.0170667	TP53/BCL2	2
GO:0071855	neuropeptide receptor binding	2/55	32/17697	0.00443099	0.0288014	0.0170667	EDN1/EDN3	2
GO:0047485	protein N-terminus binding	3/55	109/17697	0.00472578	0.0295445	0.0175071	TP53/SNCA/RELA	3
GO:0061134	peptidase regulator activity	4/55	219/17697	0.00475192	0.0295445	0.0175071	APP/SERPINE1/SNCA/VCP	4
GO:0042826	histone deacetylase binding	3/55	111/17697	0.0049715	0.0302521	0.0179263	TP53/RELA/HIF1A	3
GO:0042626	ATPase activity, coupled to transmembrane movement of substances	3/55	115/17697	0.00548578	0.0319379	0.0189253	ABCB1/ATP2C1/ABCC2	3
GO:0043492	ATPase activity, coupled to movement of substances	3/55	115/17697	0.00548578	0.0319379	0.0189253	ABCB1/ATP2C1/ABCC2	3
GO:0019825	oxygen binding	2/55	36/17697	0.00558355	0.0319379	0.0189253	CYP2C19/HBA2	2
GO:0001158	enhancer sequence-specific DNA binding	3/55	119/17697	0.00603095	0.0334882	0.0198439	TP53/JUN/RELA	3
GO:0016504	peptidase activator activity	2/55	38/17697	0.00620585	0.0334882	0.0198439	APP/VCP	2
GO:0042056	chemoattractant activity	2/55	38/17697	0.00620585	0.0334882	0.0198439	CCL3/VEGFA	2
GO:0005179	hormone activity	3/55	122/17697	0.00646039	0.0342161	0.0202753	TTR/EDN1/EDN3	3
GO:0015405	P-P-bond-hydrolysis-driven transmembrane transporter activity	3/55	123/17697	0.00660749	0.034359	0.0203599	ABCB1/ATP2C1/ABCC2	3
GO:0015399	primary active transmembrane transporter activity	3/55	125/17697	0.00690767	0.0352785	0.0209048	ABCB1/ATP2C1/ABCC2	3
GO:0019894	kinesin binding	2/55	42/17697	0.00754057	0.0372056	0.0220468	NEFH/SNCA	2
GO:1901681	sulfur compound binding	4/55	250/17697	0.0075452	0.0372056	0.0220468	F2/APP/GSTM1/VEGFA	4
GO:0001221	transcription cofactor binding	2/55	43/17697	0.00789275	0.0382598	0.0226714	ESR1/RELA	2
GO:0035326	enhancer binding	3/55	133/17697	0.00818898	0.0390341	0.0231303	TP53/JUN/RELA	3
GO:0032813	tumor necrosis factor receptor superfamily binding	2/55	46/17697	0.0089929	0.0421634	0.0249846	TNF/CASP3	2
GO:0004879	nuclear receptor activity	2/55	47/17697	0.009374	0.042555	0.0252166	ESR1/STAT3	2
GO:0098531	transcription factor activity, direct ligand regulated sequence-specific DNA binding	2/55	47/17697	0.009374	0.042555	0.0252166	ESR1/STAT3	2
GO:0008009	chemokine activity	2/55	49/17697	0.0101575	0.0453914	0.0268973	CCL3/CCL2	2

## Sheet: KEGG-112
Supplementary Table S6 | KEGG pathway enrichment analysis for the 55 common targets
KEGG ID	Description	GeneRatio	BgRatio	pvalue	p.adjust	qvalue	GeneID	Count
hsa04933	AGE-RAGE signaling pathway in diabetic complications	15/51	100/8077	1.84159e-17	3.64634e-15	1.60896e-15	SERPINE1/COL1A1/VEGFA/TNF/STAT3/CCL2/RELA/MAPK1/NOS3/MMP2/JUN/ICAM1/EDN1/CASP3/BCL2	15
hsa05418	Fluid shear stress and atherosclerosis	14/51	139/8077	7.73902e-14	7.66163e-12	3.38073e-12	GSTM1/VEGFA/TP53/TNF/CCL2/RELA/NOS3/MMP9/MMP2/JUN/ICAM1/HMOX1/EDN1/BCL2	14
hsa04668	TNF signaling pathway	11/51	112/8077	6.62998e-11	4.37579e-09	1.93084e-09	TNF/CCL2/RELA/PTGS2/MAPK1/NFKBIA/MMP9/JUN/ICAM1/EDN1/CASP3	11
hsa04657	IL-17 signaling pathway	10/51	94/8077	2.41489e-10	1.19537e-08	5.27462e-09	MMP1/TNF/CCL2/RELA/PTGS2/MAPK1/NFKBIA/MMP9/JUN/CASP3	10
hsa04926	Relaxin signaling pathway	11/51	129/8077	3.10831e-10	1.23089e-08	5.43136e-09	MMP1/COL1A1/VEGFA/RELA/MAPK1/NOS3/NFKBIA/MMP9/MMP2/JUN/EDN1	11
hsa04066	HIF-1 signaling pathway	10/51	109/8077	1.06183e-09	3.50403e-08	1.54617e-08	SERPINE1/VEGFA/STAT3/RELA/MAPK1/NOS3/HMOX1/HIF1A/EDN1/BCL2	10
hsa05167	Kaposi sarcoma-associated herpesvirus infection	12/51	193/8077	1.7296e-09	4.89229e-08	2.15874e-08	VEGFA/TP53/STAT3/RELA/PTGS2/MAPK1/NFKBIA/JUN/ICAM1/HIF1A/CASP9/CASP3	12
hsa05205	Proteoglycans in cancer	12/51	205/8077	3.44866e-09	7.88455e-08	3.4791e-08	PLAU/ESR1/COL1A1/VEGFA/TP53/TNF/STAT3/MAPK1/MMP9/MMP2/HIF1A/CASP3	12
hsa05161	Hepatitis B	11/51	162/8077	3.58389e-09	7.88455e-08	3.4791e-08	TP53/TNF/STAT3/RELA/MAPK1/NFKBIA/MMP9/JUN/CASP9/CASP3/BCL2	11
hsa04210	Apoptosis	10/51	136/8077	9.33259e-09	1.78405e-07	7.87222e-08	TP53/TNF/RELA/MAPK1/NFKBIA/JUN/CASP9/CASP3/BCL2L1/BCL2	10
hsa05163	Human cytomegalovirus infection	12/51	225/8077	9.91141e-09	1.78405e-07	7.87222e-08	VEGFA/TP53/TNF/STAT3/CCL3/CCL2/RELA/PTGS2/MAPK1/NFKBIA/CASP9/CASP3	12
hsa01524	Platinum drug resistance	8/51	73/8077	1.40351e-08	2.3158e-07	1.02186e-07	GSTM1/TP53/MAPK1/CASP9/CASP3/BCL2L1/BCL2	8
hsa05145	Toxoplasmosis	9/51	112/8077	2.56348e-08	3.90437e-07	1.72282e-07	TNF/STAT3/RELA/MAPK1/NFKBIA/CASP9/CASP3/BCL2L1/BCL2	9
hsa05222	Small cell lung cancer	8/51	92/8077	8.87737e-08	1.25551e-06	5.54001e-07	TP53/RELA/PTGS2/NFKBIA/CASP9/CASP3/BCL2L1/BCL2	8
hsa05215	Prostate cancer	8/51	97/8077	1.34585e-07	1.77653e-06	7.839e-07	PLAU/TP53/RELA/MAPK1/NFKBIA/MMP9/CASP9/BCL2	8
hsa05162	Measles	9/51	139/8077	1.68249e-07	2.07202e-06	9.14289e-07	TP53/STAT3/RELA/NFKBIA/JUN/CASP9/CASP3/BCL2L1/BCL2	9
hsa05219	Bladder cancer	6/51	41/8077	1.77901e-07	2.07202e-06	9.14289e-07	MMP1/VEGFA/TP53/MAPK1/MMP9/MMP2	6
hsa05142	Chagas disease	8/51	102/8077	1.99407e-07	2.19348e-06	9.67883e-07	SERPINE1/TNF/CCL3/CCL2/RELA/MAPK1/NFKBIA/JUN	8
hsa04064	NF-kappa B signaling pathway	8/51	104/8077	2.31992e-07	2.4176e-06	1.06678e-06	PLAU/TNF/RELA/PTGS2/NFKBIA/ICAM1/BCL2L1/BCL2	8
hsa05169	Epstein-Barr virus infection	10/51	202/8077	4.00603e-07	3.86454e-06	1.70524e-06	TP53/TNF/STAT3/RELA/NFKBIA/JUN/ICAM1/CASP9/CASP3/BCL2	10
hsa05212	Pancreatic cancer	7/51	76/8077	4.09875e-07	3.86454e-06	1.70524e-06	VEGFA/TP53/STAT3/RELA/MAPK1/CASP9/BCL2L1	7
hsa05022	Pathways of neurodegeneration - multiple diseases	14/51	475/8077	8.43238e-07	7.58915e-06	3.34875e-06	VCP/SNCA/NEFL/NEFH/APP/TNF/SOD1/RELA/PTGS2/MAPK1/CASP9/CASP3/BCL2L1/BCL2	14
hsa05134	Legionellosis	6/51	57/8077	1.32979e-06	1.14478e-05	5.05139e-06	VCP/TNF/RELA/NFKBIA/CASP9/CASP3	6
hsa04215	Apoptosis - multiple species	5/51	32/8077	1.45404e-06	1.19958e-05	5.2932e-06	NGFR/CASP9/CASP3/BCL2L1/BCL2	5
hsa05323	Rheumatoid arthritis	7/51	93/8077	1.63715e-06	1.29663e-05	5.72142e-06	MMP1/VEGFA/TNF/CCL3/CCL2/JUN/ICAM1	7
hsa01522	Endocrine resistance	7/51	98/8077	2.33411e-06	1.77752e-05	7.84338e-06	ESR1/TP53/MAPK1/MMP9/MMP2/JUN/BCL2	7
hsa05206	MicroRNAs in cancer	11/51	310/8077	2.68725e-06	1.97065e-05	8.69559e-06	PLAU/VEGFA/TP53/STAT3/PTGS2/MAPK1/ABCB1/MMP9/HMOX1/CASP3/BCL2	11
hsa05160	Hepatitis C	8/51	157/8077	5.34062e-06	3.77658e-05	1.66643e-05	TP53/TNF/STAT3/RELA/MAPK1/NFKBIA/CASP9/CASP3	8
hsa04115	p53 signaling pathway	6/51	73/8077	5.77776e-06	3.8465e-05	1.69728e-05	SERPINE1/TP53/CASP9/CASP3/BCL2L1/BCL2	6
hsa05170	Human immunodeficiency virus 1 infection	9/51	212/8077	5.82802e-06	3.8465e-05	1.69728e-05	TNF/RELA/MAPK1/NFKBIA/JUN/CASP9/CASP3/BCL2L1/BCL2	9
hsa05140	Leishmaniasis	6/51	77/8077	7.89438e-06	5.04222e-05	2.2249e-05	TNF/RELA/PTGS2/MAPK1/NFKBIA/JUN	6
hsa04722	Neurotrophin signaling pathway	7/51	119/8077	8.54555e-06	5.28756e-05	2.33316e-05	NGFR/TP53/RELA/MAPK1/NFKBIA/JUN/BCL2	7
hsa05164	Influenza A	8/51	171/8077	1.00421e-05	6.02524e-05	2.65866e-05	TNF/CCL2/RELA/MAPK1/NFKBIA/ICAM1/CASP9/CASP3	8
hsa05171	Coronavirus disease - COVID-19	9/51	231/8077	1.16945e-05	6.81034e-05	3.00509e-05	#N/A	9
hsa05210	Colorectal cancer	6/51	86/8077	1.49937e-05	8.37349e-05	3.69484e-05	TP53/MAPK1/JUN/CASP9/CASP3/BCL2	6
hsa04621	NOD-like receptor signaling pathway	8/51	181/8077	1.52245e-05	8.37349e-05	3.69484e-05	TNF/CCL2/RELA/MAPK1/NFKBIA/JUN/BCL2L1/BCL2	8
hsa05235	PD-L1 expression and PD-1 checkpoint pathway in cancer	6/51	89/8077	1.82676e-05	9.77564e-05	4.31354e-05	STAT3/RELA/MAPK1/NFKBIA/JUN/HIF1A	6
hsa04915	Estrogen signaling pathway	7/51	138/8077	2.25627e-05	0.000117564	5.18755e-05	ESR1/MAPK1/NOS3/MMP9/MMP2/JUN/BCL2	7
hsa05130	Pathogenic Escherichia coli infection	8/51	197/8077	2.81307e-05	0.000142817	6.30188e-05	TNF/RELA/MAPK1/NFKBIA/JUN/F2/CASP9/CASP3	8
hsa04370	VEGF signaling pathway	5/51	59/8077	3.17943e-05	0.000157382	6.94455e-05	VEGFA/PTGS2/MAPK1/NOS3/CASP9	5
hsa04620	Toll-like receptor signaling pathway	6/51	104/8077	4.43921e-05	0.000209277	9.23445e-05	TNF/CCL3/RELA/MAPK1/NFKBIA/JUN	6
hsa04625	C-type lectin receptor signaling pathway	6/51	104/8077	4.43921e-05	0.000209277	9.23445e-05	TNF/RELA/PTGS2/MAPK1/NFKBIA/JUN	6
hsa04659	Th17 cell differentiation	6/51	107/8077	5.21178e-05	0.000239984	0.000105894	STAT3/RELA/MAPK1/NFKBIA/JUN/HIF1A	6
hsa04024	cAMP signaling pathway	8/51	216/8077	5.43387e-05	0.000244524	0.000107897	EDNRA/EDN3/DRD2/RELA/MAPK1/NFKBIA/JUN/EDN1	8
hsa04151	PI3K-Akt signaling pathway	10/51	354/8077	5.89251e-05	0.000257919	0.000113808	NGFR/COL1A1/VEGFA/TP53/RELA/MAPK1/NOS3/CASP9/BCL2L1/BCL2	10
hsa05166	Human T-cell leukemia virus 1 infection	8/51	219/8077	5.99207e-05	0.000257919	0.000113808	TP53/TNF/RELA/MAPK1/NFKBIA/JUN/ICAM1/BCL2L1	8
hsa04137	Mitophagy - animal	5/51	68/8077	6.34304e-05	0.000267217	0.000117911	TP53/RELA/JUN/HIF1A/BCL2L1	5
hsa05014	Amyotrophic lateral sclerosis	10/51	364/8077	7.45116e-05	0.00030736	0.000135624	VCP/NEFL/NEFH/TP53/TNF/SOD1/CASP9/CASP3/BCL2L1/BCL2	10
hsa04726	Serotonergic synapse	6/51	115/8077	7.80916e-05	0.000315554	0.00013924	PTGS1/APP/CYP2C19/PTGS2/MAPK1/CASP3	6
hsa04071	Sphingolipid signaling pathway	6/51	119/8077	9.44805e-05	0.000374143	0.000165092	TP53/TNF/RELA/MAPK1/NOS3/BCL2	6
hsa05133	Pertussis	5/51	76/8077	0.000108228	0.000412099	0.000181841	TNF/RELA/MAPK1/JUN/CASP3	5
hsa05220	Chronic myeloid leukemia	5/51	76/8077	0.000108228	0.000412099	0.000181841	TP53/RELA/MAPK1/NFKBIA/BCL2L1	5
hsa01521	EGFR tyrosine kinase inhibitor resistance	5/51	79/8077	0.000130161	0.000486261	0.000214565	VEGFA/STAT3/MAPK1/BCL2L1/BCL2	5
hsa05131	Shigellosis	8/51	246/8077	0.000135362	0.000496327	0.000219007	TP53/TNF/RELA/MAPK1/NFKBIA/JUN/BCL2L1/BCL2	8
hsa04610	Complement and coagulation cascades	5/51	85/8077	0.000184119	0.000662829	0.000292476	PLAU/SERPINE1/F10/F7/F2	5
hsa05135	Yersinia infection	6/51	137/8077	0.000205277	0.0007258	0.000320263	TNF/CCL2/RELA/MAPK1/NFKBIA/JUN	6
hsa05144	Malaria	4/51	50/8077	0.00026214	0.00091029	0.00040167	HBA2/TNF/CCL2/ICAM1	4
hsa05203	Viral carcinogenesis	7/51	204/8077	0.000266651	0.00091029	0.00040167	TP53/STAT3/RELA/MAPK1/NFKBIA/JUN/CASP3	7
hsa04010	MAPK signaling pathway	8/51	294/8077	0.000455945	0.00153012	0.000675173	NGFR/VEGFA/TP53/TNF/RELA/MAPK1/JUN/CASP3	8
hsa04660	T cell receptor signaling pathway	5/51	104/8077	0.000471707	0.00155663	0.000686871	TNF/RELA/MAPK1/NFKBIA/JUN	5
hsa04931	Insulin resistance	5/51	108/8077	0.000561022	0.00182102	0.000803534	TNF/STAT3/RELA/NOS3/NFKBIA	5
hsa05321	Inflammatory bowel disease	4/51	65/8077	0.00071879	0.00229549	0.0010129	TNF/STAT3/RELA/JUN	4
hsa05152	Tuberculosis	6/51	180/8077	0.000882775	0.0026903	0.00118711	TNF/RELA/MAPK1/CASP9/CASP3/BCL2	6
hsa05132	Salmonella infection	7/51	249/8077	0.000883529	0.0026903	0.00118711	TNF/RELA/MAPK1/NFKBIA/JUN/CASP3/BCL2	7
hsa04920	Adipocytokine signaling pathway	4/51	69/8077	0.000900937	0.0026903	0.00118711	TNF/STAT3/RELA/NFKBIA	4
hsa05211	Renal cell carcinoma	4/51	69/8077	0.000900937	0.0026903	0.00118711	VEGFA/MAPK1/JUN/HIF1A	4
hsa04919	Thyroid hormone signaling pathway	5/51	121/8077	0.000940739	0.0026903	0.00118711	ESR1/TP53/MAPK1/HIF1A/CASP9	5
hsa01523	Antifolate resistance	3/51	31/8077	0.000941208	0.0026903	0.00118711	TNF/RELA	3
hsa04917	Prolactin signaling pathway	4/51	70/8077	0.000951118	0.0026903	0.00118711	ESR1/STAT3/RELA/MAPK1	4
hsa05120	Epithelial cell signaling in Helicobacter pylori infection	4/51	70/8077	0.000951118	0.0026903	0.00118711	RELA/NFKBIA/JUN/CASP3	4
hsa05165	Human papillomavirus infection	8/51	331/8077	0.000995838	0.00277713	0.00122542	COL1A1/VEGFA/TP53/TNF/RELA/PTGS2/MAPK1/CASP3	8
hsa04611	Platelet activation	5/51	124/8077	0.00105043	0.00286785	0.00126545	PTGS1/COL1A1/MAPK1/NOS3/F2	5
hsa05223	Non-small cell lung cancer	4/51	72/8077	0.00105734	0.00286785	0.00126545	TP53/STAT3/MAPK1/CASP9	4
hsa04380	Osteoclast differentiation	5/51	128/8077	0.00121117	0.00321539	0.0014188	TNF/RELA/MAPK1/NFKBIA/JUN	5
hsa04062	Chemokine signaling pathway	6/51	192/8077	0.00123419	0.00321539	0.0014188	STAT3/CCL3/CCL2/RELA/MAPK1/NFKBIA	6
hsa05202	Transcriptional misregulation in cancer	6/51	192/8077	0.00123419	0.00321539	0.0014188	PLAU/NGFR/TP53/RELA/MMP9/BCL2L1	6
hsa05143	African trypanosomiasis	3/51	37/8077	0.00158418	0.00407362	0.0017975	HBA2/TNF/ICAM1	3
hsa04662	B cell receptor signaling pathway	4/51	82/8077	0.0017162	0.00435651	0.00192233	RELA/MAPK1/NFKBIA/JUN	4
hsa05204	Chemical carcinogenesis	4/51	83/8077	0.00179476	0.00449827	0.00198488	GSTM1/CYP2C19/ADH1C/PTGS2	4
hsa05010	Alzheimer disease	8/51	369/8077	0.00199607	0.00494028	0.00217992	SNCA/APP/TNF/RELA/PTGS2/MAPK1/CASP9/CASP3	8
hsa04658	Th1 and Th2 cell differentiation	4/51	92/8077	0.00261766	0.00639871	0.00282346	RELA/MAPK1/NFKBIA/JUN	4
hsa05030	Cocaine addiction	3/51	49/8077	0.00356182	0.00850442	0.00375262	DRD2/RELA/JUN	3
hsa05168	Herpes simplex virus 1 infection	9/51	498/8077	0.00356499	0.00850442	0.00375262	TP53/TNF/CCL2/RELA/NFKBIA/CASP9/CASP3/BCL2L1/BCL2	9
hsa05146	Amoebiasis	4/51	102/8077	0.00380128	0.00896017	0.00395372	COL1A1/TNF/RELA/CASP3	4
hsa05225	Hepatocellular carcinoma	5/51	168/8077	0.00397904	0.00926881	0.00408991	GSTM1/TP53/MAPK1/HMOX1/BCL2L1	5
hsa05012	Parkinson disease	6/51	249/8077	0.00455248	0.0104813	0.00462492	SNCA/DRD2/TP53/CASP9/CASP3/BCL2L1	6
hsa04080	Neuroactive ligand-receptor interaction	7/51	341/8077	0.0052478	0.0119433	0.00527002	EDNRA/EDN3/DRD2/CNR2/CNR1/F2/EDN1	7
hsa05213	Endometrial cancer	3/51	58/8077	0.00573251	0.0128981	0.00569136	TP53/MAPK1/CASP9	3
hsa05416	Viral myocarditis	3/51	60/8077	0.00630157	0.0140192	0.00618605	ICAM1/CASP9/CASP3	3
hsa00590	Arachidonic acid metabolism	3/51	61/8077	0.00659832	0.0145163	0.00640539	PTGS1/CYP2C19/PTGS2	3
hsa04510	Focal adhesion	5/51	201/8077	0.00843126	0.0183449	0.00809479	COL1A1/VEGFA/MAPK1/JUN/BCL2	5
hsa05221	Acute myeloid leukemia	3/51	67/8077	0.00855339	0.0184084	0.00812278	STAT3/RELA/MAPK1	3
hsa04650	Natural killer cell mediated cytotoxicity	4/51	131/8077	0.00916864	0.0195203	0.00861344	TNF/MAPK1/ICAM1/CASP3	4
hsa04924	Renin secretion	3/51	69/8077	0.0092728	0.0195321	0.00861862	EDNRA/EDN3/EDN1	3
hsa04622	RIG-I-like receptor signaling pathway	3/51	70/8077	0.00964541	0.0197163	0.00869993	TNF/RELA/NFKBIA	3
hsa05230	Central carbon metabolism in cancer	3/51	70/8077	0.00964541	0.0197163	0.00869993	TP53/MAPK1/HIF1A	3
hsa04270	Vascular smooth muscle contraction	4/51	133/8077	0.00965902	0.0197163	0.00869993	EDNRA/EDN3/MAPK1/EDN1	4
hsa04015	Rap1 signaling pathway	5/51	210/8077	0.0100816	0.020369	0.0089879	NGFR/DRD2/CNR1/VEGFA/MAPK1	5
hsa00982	Drug metabolism - cytochrome P450	3/51	72/8077	0.0104167	0.0208333	0.0091928	GSTM1/CYP2C19/ADH1C	3
hsa04140	Autophagy - animal	4/51	137/8077	0.0106905	0.0211672	0.00934013	MAPK1/HIF1A/BCL2L1/BCL2	4
hsa05224	Breast cancer	4/51	147/8077	0.013575	0.0266123	0.0117428	ESR1/TP53/MAPK1/JUN	4
hsa05226	Gastric cancer	4/51	149/8077	0.0142059	0.0275761	0.0121681	TP53/MAPK1/ABCB1/BCL2	4
hsa04932	Non-alcoholic fatty liver disease	4/51	150/8077	0.0145282	0.027928	0.0123234	TNF/RELA/JUN/CASP3	4
hsa04014	Ras signaling pathway	5/51	232/8077	0.0150276	0.0286103	0.0126244	NGFR/VEGFA/RELA/MAPK1/BCL2L1	5
hsa04921	Oxytocin signaling pathway	4/51	154/8077	0.015864	0.0299151	0.0132002	PTGS2/MAPK1/NOS3/JUN	4
hsa04218	Cellular senescence	4/51	156/8077	0.0165602	0.0309331	0.0136494	SERPINE1/TP53/RELA/MAPK1	4
hsa04912	GnRH signaling pathway	3/51	93/8077	0.0206678	0.0382452	0.0168759	MAPK1/MMP2/JUN	3
hsa05216	Thyroid cancer	2/51	37/8077	0.0226149	0.0414606	0.0182947	TP53/MAPK1	2
hsa05231	Choline metabolism in cancer	3/51	98/8077	0.0236998	0.043051	0.0189964	MAPK1/JUN/HIF1A	3
hsa04061	Viral protein interaction with cytokine and cytokine receptor	3/51	100/8077	0.0249768	0.0449583	0.019838	TNF/CCL3/CCL2	3
hsa04216	Ferroptosis	2/51	41/8077	0.0274032	0.0488815	0.0215692	TP53/HMOX1	2
hsa05020	Prion disease	5/51	273/8077	0.0281524	0.0497694	0.021961	TNF/SOD1/MAPK1/CASP9/CASP3	5
