# Supplementary material for: Investigation of the Multi-Target Mechanism of Guanxin-Shutong Capsule in Cerebrovascular Diseases: A Systems Pharmacology and Experimental Assessment
Source: Front Pharmacol. 2021 May 13;12:650770. doi: 10.3389/fphar.2021.650770 (PMC8155632; doi:10.3389/fphar.2021.650770)
Supplement: Supplementary file 6 [file Table5.XLSX]

## Sheet: PPI data of 26 key targets
Supplementary Table S5 | PPI data of 26 key targets
#node1	node2	node1_string_id	node2_string_id	coexpression	experimentally_determined_interaction	database_annotated	automated_textmining	combined_score
APP	MAPK1	9606.ENSP00000284981	9606.ENSP00000215832	0.062	0.08	0.9	0.492	0.95
APP	SERPINE1	9606.ENSP00000284981	9606.ENSP00000223095	0	0	0.9	0.25	0.921
APP	TP53	9606.ENSP00000284981	9606.ENSP00000269305	0	0	0	0.717	0.717
APP	SOD1	9606.ENSP00000284981	9606.ENSP00000270142	0.05	0	0	0.735	0.738
APP	JUN	9606.ENSP00000284981	9606.ENSP00000360266	0.061	0.106	0	0.685	0.713
APP	TNF	9606.ENSP00000284981	9606.ENSP00000398698	0	0.302	0	0.725	0.8
APP	CASP3	9606.ENSP00000284981	9606.ENSP00000311032	0.062	0.682	0	0.665	0.891
APP	EDN1	9606.ENSP00000284981	9606.ENSP00000368683	0.065	0	0.9	0.269	0.925
APP	RELA	9606.ENSP00000284981	9606.ENSP00000384273	0	0	0.9	0.408	0.938
APP	VEGFA	9606.ENSP00000284981	9606.ENSP00000478570	0.067	0	0.9	0.44	0.943
APP	F2	9606.ENSP00000284981	9606.ENSP00000308541	0	0.132	0.9	0.413	0.944
BCL2	MAPK1	9606.ENSP00000381185	9606.ENSP00000215832	0	0.379	0.9	0.198	0.945
BCL2	STAT3	9606.ENSP00000381185	9606.ENSP00000264657	0	0.186	0.9	0.225	0.931
BCL2	TP53	9606.ENSP00000381185	9606.ENSP00000269305	0.05	0.525	0.9	0.705	0.984
BCL2	SOD1	9606.ENSP00000381185	9606.ENSP00000270142	0	0.379	0.8	0.117	0.88
BCL2	BCL2L1	9606.ENSP00000381185	9606.ENSP00000302564	0	0.912	0.9	0.633	0.991
BCL2	CASP3	9606.ENSP00000381185	9606.ENSP00000311032	0	0.461	0	0.578	0.763
BCL2	ESR1	9606.ENSP00000381185	9606.ENSP00000405330	0.069	0.064	0.9	0.244	0.925
BCL2L1	MAPK1	9606.ENSP00000302564	9606.ENSP00000215832	0	0	0.9	0.786	0.977
BCL2L1	STAT3	9606.ENSP00000302564	9606.ENSP00000264657	0	0.263	0.9	0.916	0.993
BCL2L1	TP53	9606.ENSP00000302564	9606.ENSP00000269305	0.05	0.912	0.9	0.967	0.999
BCL2L1	RELA	9606.ENSP00000302564	9606.ENSP00000384273	0.082	0.336	0	0.63	0.754
BCL2L1	TNF	9606.ENSP00000302564	9606.ENSP00000398698	0	0.157	0	0.809	0.833
BCL2L1	CASP3	9606.ENSP00000302564	9606.ENSP00000311032	0	0.168	0	0.927	0.937
CASP3	MAPK1	9606.ENSP00000311032	9606.ENSP00000215832	0.048	0.261	0	0.757	0.814
CASP3	HMOX1	9606.ENSP00000311032	9606.ENSP00000216117	0	0	0	0.726	0.726
CASP3	STAT3	9606.ENSP00000311032	9606.ENSP00000264657	0	0	0	0.858	0.858
CASP3	TP53	9606.ENSP00000311032	9606.ENSP00000269305	0.061	0	0	0.942	0.944
CASP3	NOS3	9606.ENSP00000311032	9606.ENSP00000297494	0	0	0	0.793	0.793
CASP3	MMP9	9606.ENSP00000311032	9606.ENSP00000361405	0.063	0	0	0.716	0.723
CASP3	VEGFA	9606.ENSP00000311032	9606.ENSP00000478570	0	0	0	0.737	0.737
CASP3	TNF	9606.ENSP00000311032	9606.ENSP00000398698	0	0.302	0	0.825	0.873
CASP3	JUN	9606.ENSP00000311032	9606.ENSP00000360266	0	0.069	0	0.87	0.874
CCL2	MAPK1	9606.ENSP00000225831	9606.ENSP00000215832	0	0	0	0.795	0.795
CCL2	HMOX1	9606.ENSP00000225831	9606.ENSP00000216117	0.094	0	0	0.81	0.821
CCL2	MMP2	9606.ENSP00000225831	9606.ENSP00000219070	0.155	0	0	0.802	0.825
CCL2	SERPINE1	9606.ENSP00000225831	9606.ENSP00000223095	0.122	0	0	0.73	0.752
CCL2	TP53	9606.ENSP00000225831	9606.ENSP00000269305	0	0	0	0.725	0.725
CCL2	MMP9	9606.ENSP00000225831	9606.ENSP00000361405	0.076	0	0	0.843	0.849
CCL2	PTGS2	9606.ENSP00000225831	9606.ENSP00000356438	0.117	0	0	0.847	0.859
CCL2	MMP1	9606.ENSP00000225831	9606.ENSP00000322788	0.102	0.379	0	0.806	0.882
CCL2	VEGFA	9606.ENSP00000225831	9606.ENSP00000478570	0	0	0	0.914	0.914
CCL2	ICAM1	9606.ENSP00000225831	9606.ENSP00000264832	0.149	0	0	0.919	0.929
CCL2	RELA	9606.ENSP00000225831	9606.ENSP00000384273	0	0.379	0.8	0.555	0.939
CCL2	TNF	9606.ENSP00000225831	9606.ENSP00000398698	0.062	0	0	0.969	0.971
CCL2	JUN	9606.ENSP00000225831	9606.ENSP00000360266	0.062	0	0.9	0.792	0.978
CCL2	STAT3	9606.ENSP00000225831	9606.ENSP00000264657	0	0	0.9	0.824	0.981
EDN1	MAPK1	9606.ENSP00000368683	9606.ENSP00000215832	0	0	0.9	0.713	0.97
EDN1	HMOX1	9606.ENSP00000368683	9606.ENSP00000216117	0	0	0	0.738	0.738
EDN1	MMP2	9606.ENSP00000368683	9606.ENSP00000219070	0.061	0	0.8	0.738	0.946
EDN1	ICAM1	9606.ENSP00000368683	9606.ENSP00000264832	0.065	0	0	0.801	0.807
EDN1	NOS3	9606.ENSP00000368683	9606.ENSP00000297494	0	0	0	0.941	0.941
EDN1	F2	9606.ENSP00000368683	9606.ENSP00000308541	0	0	0.9	0.52	0.95
EDN1	PTGS2	9606.ENSP00000368683	9606.ENSP00000356438	0.089	0	0	0.786	0.796
EDN1	JUN	9606.ENSP00000368683	9606.ENSP00000360266	0.073	0	0.9	0.554	0.955
EDN1	MMP9	9606.ENSP00000368683	9606.ENSP00000361405	0	0	0.8	0.763	0.95
EDN1	TNF	9606.ENSP00000368683	9606.ENSP00000398698	0.063	0	0	0.802	0.807
EDN1	VEGFA	9606.ENSP00000368683	9606.ENSP00000478570	0	0	0	0.892	0.892
EDN1	HIF1A	9606.ENSP00000368683	9606.ENSP00000437955	0	0	0.9	0.48	0.945
ESR1	MAPK1	9606.ENSP00000405330	9606.ENSP00000215832	0	0.399	0.9	0.57	0.971
ESR1	STAT3	9606.ENSP00000405330	9606.ENSP00000264657	0	0.386	0	0.773	0.855
ESR1	TP53	9606.ENSP00000405330	9606.ENSP00000269305	0	0.379	0	0.919	0.948
ESR1	NOS3	9606.ENSP00000405330	9606.ENSP00000297494	0	0.472	0.9	0.749	0.985
ESR1	PTGS2	9606.ENSP00000405330	9606.ENSP00000356438	0	0.05	0	0.771	0.773
ESR1	JUN	9606.ENSP00000405330	9606.ENSP00000360266	0	0.472	0.9	0.646	0.979
ESR1	HIF1A	9606.ENSP00000405330	9606.ENSP00000437955	0	0.413	0	0.695	0.813
ESR1	VEGFA	9606.ENSP00000405330	9606.ENSP00000478570	0.061	0	0	0.813	0.816
F2	MAPK1	9606.ENSP00000308541	9606.ENSP00000215832	0	0.053	0.9	0.331	0.931
F2	SERPINE1	9606.ENSP00000308541	9606.ENSP00000223095	0.072	0.435	0	0.736	0.849
HIF1A	MAPK1	9606.ENSP00000437955	9606.ENSP00000215832	0	0.294	0.8	0.455	0.916
HIF1A	HMOX1	9606.ENSP00000437955	9606.ENSP00000216117	0	0	0	0.729	0.73
HIF1A	MMP2	9606.ENSP00000437955	9606.ENSP00000219070	0	0	0	0.72	0.721
HIF1A	STAT3	9606.ENSP00000437955	9606.ENSP00000264657	0.061	0.434	0.9	0.781	0.986
HIF1A	TP53	9606.ENSP00000437955	9606.ENSP00000269305	0	0.379	0.9	0.674	0.977
HIF1A	NOS3	9606.ENSP00000437955	9606.ENSP00000297494	0	0	0.9	0.706	0.969
HIF1A	JUN	9606.ENSP00000437955	9606.ENSP00000360266	0	0.379	0.9	0.561	0.97
HIF1A	VEGFA	9606.ENSP00000437955	9606.ENSP00000478570	0.062	0.348	0.9	0.947	0.996
HMOX1	MAPK1	9606.ENSP00000216117	9606.ENSP00000215832	0	0	0	0.778	0.779
HMOX1	STAT3	9606.ENSP00000216117	9606.ENSP00000264657	0	0	0	0.714	0.714
HMOX1	SOD1	9606.ENSP00000216117	9606.ENSP00000270142	0	0	0	0.728	0.728
HMOX1	MMP9	9606.ENSP00000216117	9606.ENSP00000361405	0.088	0	0	0.745	0.759
HMOX1	TP53	9606.ENSP00000216117	9606.ENSP00000269305	0.061	0	0	0.761	0.766
HMOX1	TNF	9606.ENSP00000216117	9606.ENSP00000398698	0	0	0	0.816	0.816
HMOX1	PTGS2	9606.ENSP00000216117	9606.ENSP00000356438	0.076	0	0	0.827	0.834
HMOX1	NOS3	9606.ENSP00000216117	9606.ENSP00000297494	0	0.185	0	0.829	0.855
HMOX1	VEGFA	9606.ENSP00000216117	9606.ENSP00000478570	0	0	0	0.867	0.867
HMOX1	JUN	9606.ENSP00000216117	9606.ENSP00000360266	0	0	0.9	0.784	0.977
ICAM1	MAPK1	9606.ENSP00000264832	9606.ENSP00000215832	0	0	0	0.723	0.723
ICAM1	NFKBIA	9606.ENSP00000264832	9606.ENSP00000216797	0.126	0	0	0.769	0.789
ICAM1	MMP2	9606.ENSP00000264832	9606.ENSP00000219070	0	0	0	0.743	0.743
ICAM1	STAT3	9606.ENSP00000264832	9606.ENSP00000264657	0.084	0	0.9	0.749	0.975
ICAM1	NOS3	9606.ENSP00000264832	9606.ENSP00000297494	0	0	0	0.705	0.705
ICAM1	PTGS2	9606.ENSP00000264832	9606.ENSP00000356438	0.123	0	0	0.677	0.705
ICAM1	TP53	9606.ENSP00000264832	9606.ENSP00000269305	0.061	0	0	0.726	0.731
ICAM1	RELA	9606.ENSP00000264832	9606.ENSP00000384273	0.065	0.417	0	0.554	0.735
ICAM1	MMP9	9606.ENSP00000264832	9606.ENSP00000361405	0.093	0	0	0.722	0.737
ICAM1	JUN	9606.ENSP00000264832	9606.ENSP00000360266	0	0	0	0.755	0.755
ICAM1	VEGFA	9606.ENSP00000264832	9606.ENSP00000478570	0	0	0	0.89	0.89
ICAM1	TNF	9606.ENSP00000264832	9606.ENSP00000398698	0.119	0	0	0.957	0.96
JUN	MAPK1	9606.ENSP00000360266	9606.ENSP00000215832	0	0.411	0.9	0.952	0.996
JUN	NFKBIA	9606.ENSP00000360266	9606.ENSP00000216797	0.125	0	0.9	0.671	0.968
JUN	STAT3	9606.ENSP00000360266	9606.ENSP00000264657	0.055	0.476	0	0.852	0.921
JUN	TP53	9606.ENSP00000360266	9606.ENSP00000269305	0	0.127	0.9	0.912	0.991
JUN	NOS3	9606.ENSP00000360266	9606.ENSP00000297494	0	0	0.9	0.542	0.952
JUN	MMP1	9606.ENSP00000360266	9606.ENSP00000322788	0	0.379	0	0.641	0.767
JUN	PTGS2	9606.ENSP00000360266	9606.ENSP00000356438	0.066	0	0	0.704	0.711
JUN	MMP9	9606.ENSP00000360266	9606.ENSP00000361405	0	0.313	0	0.85	0.893
JUN	RELA	9606.ENSP00000360266	9606.ENSP00000384273	0.069	0.457	0.9	0.667	0.98
JUN	VEGFA	9606.ENSP00000360266	9606.ENSP00000478570	0.066	0.261	0.9	0.794	0.983
JUN	TNF	9606.ENSP00000360266	9606.ENSP00000398698	0	0	0.9	0.871	0.986
MAPK1	MMP1	9606.ENSP00000215832	9606.ENSP00000322788	0.049	0	0	0.714	0.717
MAPK1	NOS3	9606.ENSP00000215832	9606.ENSP00000297494	0.05	0	0	0.723	0.726
MAPK1	MMP2	9606.ENSP00000215832	9606.ENSP00000219070	0.049	0	0	0.743	0.746
MAPK1	PTGS2	9606.ENSP00000215832	9606.ENSP00000356438	0	0.266	0	0.678	0.753
MAPK1	MMP9	9606.ENSP00000215832	9606.ENSP00000361405	0.049	0	0	0.797	0.799
MAPK1	TNF	9606.ENSP00000215832	9606.ENSP00000398698	0	0	0	0.836	0.836
MAPK1	RELA	9606.ENSP00000215832	9606.ENSP00000384273	0	0	0.9	0.541	0.952
MAPK1	NFKBIA	9606.ENSP00000215832	9606.ENSP00000216797	0	0.185	0.9	0.561	0.961
MAPK1	TP53	9606.ENSP00000215832	9606.ENSP00000269305	0.055	0.532	0.8	0.859	0.985
MAPK1	STAT3	9606.ENSP00000215832	9606.ENSP00000264657	0.06	0.384	0.9	0.837	0.989
MMP1	MMP2	9606.ENSP00000322788	9606.ENSP00000219070	0.154	0	0.9	0.921	0.922
MMP1	STAT3	9606.ENSP00000322788	9606.ENSP00000264657	0	0	0.9	0.674	0.966
MMP1	TP53	9606.ENSP00000322788	9606.ENSP00000269305	0	0	0	0.707	0.707
MMP1	TNF	9606.ENSP00000322788	9606.ENSP00000398698	0.063	0	0	0.794	0.798
MMP1	VEGFA	9606.ENSP00000322788	9606.ENSP00000478570	0.069	0	0	0.827	0.832
MMP1	MMP9	9606.ENSP00000322788	9606.ENSP00000361405	0.518	0	0.9	0.91	0.961
MMP2	PTGS2	9606.ENSP00000219070	9606.ENSP00000356438	0.066	0	0	0.696	0.704
MMP2	SERPINE1	9606.ENSP00000219070	9606.ENSP00000223095	0.213	0	0	0.669	0.728
MMP2	TNF	9606.ENSP00000219070	9606.ENSP00000398698	0	0	0	0.798	0.798
MMP2	TP53	9606.ENSP00000219070	9606.ENSP00000269305	0.062	0	0	0.797	0.802
MMP2	MMP9	9606.ENSP00000219070	9606.ENSP00000361405	0.061	0	0.9	0.958	0.908
MMP2	STAT3	9606.ENSP00000219070	9606.ENSP00000264657	0	0	0.9	0.799	0.979
MMP2	VEGFA	9606.ENSP00000219070	9606.ENSP00000478570	0.065	0	0.8	0.899	0.979
MMP9	SERPINE1	9606.ENSP00000361405	9606.ENSP00000223095	0.061	0	0	0.707	0.714
MMP9	STAT3	9606.ENSP00000361405	9606.ENSP00000264657	0	0	0.9	0.824	0.981
MMP9	TP53	9606.ENSP00000361405	9606.ENSP00000269305	0	0	0	0.8	0.8
MMP9	NOS3	9606.ENSP00000361405	9606.ENSP00000297494	0.062	0	0	0.778	0.783
MMP9	PTGS2	9606.ENSP00000361405	9606.ENSP00000356438	0.097	0	0	0.725	0.741
MMP9	RELA	9606.ENSP00000361405	9606.ENSP00000384273	0	0.344	0	0.683	0.783
MMP9	TNF	9606.ENSP00000361405	9606.ENSP00000398698	0.176	0	0	0.935	0.944
MMP9	VEGFA	9606.ENSP00000361405	9606.ENSP00000478570	0	0	0.8	0.946	0.989
NFKBIA	TP53	9606.ENSP00000216797	9606.ENSP00000269305	0	0.454	0	0.515	0.723
NFKBIA	PTGS2	9606.ENSP00000216797	9606.ENSP00000356438	0.076	0	0	0.794	0.801
NFKBIA	TNF	9606.ENSP00000216797	9606.ENSP00000398698	0.152	0.379	0.9	0.874	0.992
NFKBIA	RELA	9606.ENSP00000216797	9606.ENSP00000384273	0.084	0.953	0.9	0.77	0.998
NOS3	TP53	9606.ENSP00000297494	9606.ENSP00000269305	0	0	0	0.731	0.731
NOS3	TNF	9606.ENSP00000297494	9606.ENSP00000398698	0.061	0	0	0.828	0.832
NOS3	PTGS2	9606.ENSP00000297494	9606.ENSP00000356438	0	0.261	0	0.786	0.835
NOS3	VEGFA	9606.ENSP00000297494	9606.ENSP00000478570	0.062	0	0.9	0.934	0.993
PTGS2	STAT3	9606.ENSP00000356438	9606.ENSP00000264657	0	0	0.9	0.81	0.98
PTGS2	TP53	9606.ENSP00000356438	9606.ENSP00000269305	0	0.379	0	0.869	0.915
PTGS2	VEGFA	9606.ENSP00000356438	9606.ENSP00000478570	0.082	0	0	0.914	0.918
PTGS2	TNF	9606.ENSP00000356438	9606.ENSP00000398698	0.096	0	0	0.921	0.926
RELA	STAT3	9606.ENSP00000384273	9606.ENSP00000264657	0.108	0.379	0	0.794	0.876
RELA	TP53	9606.ENSP00000384273	9606.ENSP00000269305	0.061	0.313	0	0.796	0.857
RELA	TNF	9606.ENSP00000384273	9606.ENSP00000398698	0	0.428	0.9	0.849	0.99
SERPINE1	TP53	9606.ENSP00000223095	9606.ENSP00000269305	0	0	0	0.797	0.797
SERPINE1	TNF	9606.ENSP00000223095	9606.ENSP00000398698	0.062	0	0	0.86	0.863
SERPINE1	VEGFA	9606.ENSP00000223095	9606.ENSP00000478570	0.076	0	0.9	0.821	0.982
SOD1	VEGFA	9606.ENSP00000270142	9606.ENSP00000478570	0.063	0	0	0.709	0.716
STAT3	TNF	9606.ENSP00000264657	9606.ENSP00000398698	0	0	0.9	0.774	0.976
STAT3	TP53	9606.ENSP00000264657	9606.ENSP00000269305	0	0	0.9	0.87	0.986
STAT3	VEGFA	9606.ENSP00000264657	9606.ENSP00000478570	0	0.434	0.9	0.916	0.994
TNF	TP53	9606.ENSP00000398698	9606.ENSP00000269305	0	0	0	0.824	0.825
TNF	VEGFA	9606.ENSP00000398698	9606.ENSP00000478570	0	0	0	0.919	0.919
TP53	VEGFA	9606.ENSP00000269305	9606.ENSP00000478570	0	0	0	0.918	0.918

## Sheet: PPI-combined score>0.7
Supplementary Table S5 | PPI data of 55 common targets
#node1	node2	node1_string_id	node2_string_id	coexpression	experimentally_determined_interaction	database_annotated	automated_textmining	combined_score
ABCB1	TP53	9606.ENSP00000478255	9606.ENSP00000269305	0	0	0.9	0.76	0.975
ABCB1	CYP2C19	9606.ENSP00000478255	9606.ENSP00000360372	0.062	0	0	0.736	0.742
ADH1C	GSTM1	9606.ENSP00000426083	9606.ENSP00000311469	0.061	0	0.65	0.428	0.795
APP	NGFR	9606.ENSP00000284981	9606.ENSP00000172229	0.069	0.434	0.9	0.7	0.982
APP	MAPK1	9606.ENSP00000284981	9606.ENSP00000215832	0.062	0.08	0.9	0.492	0.95
APP	SERPINE1	9606.ENSP00000284981	9606.ENSP00000223095	0	0	0.9	0.25	0.921
APP	TTR	9606.ENSP00000284981	9606.ENSP00000237014	0.063	0.379	0.9	0.546	0.97
APP	TP53	9606.ENSP00000284981	9606.ENSP00000269305	0	0	0	0.717	0.717
APP	SOD1	9606.ENSP00000284981	9606.ENSP00000270142	0.05	0	0	0.735	0.738
APP	JUN	9606.ENSP00000284981	9606.ENSP00000360266	0.061	0.106	0	0.685	0.713
APP	NEFL	9606.ENSP00000284981	9606.ENSP00000482169	0.089	0.519	0	0.53	0.776
APP	TNF	9606.ENSP00000284981	9606.ENSP00000398698	0	0.302	0	0.725	0.8
APP	CASP3	9606.ENSP00000284981	9606.ENSP00000311032	0.062	0.682	0	0.665	0.891
APP	CNR2	9606.ENSP00000284981	9606.ENSP00000363596	0	0	0.9	0.195	0.916
APP	EDN3	9606.ENSP00000284981	9606.ENSP00000337128	0	0	0.9	0.218	0.918
APP	EDNRA	9606.ENSP00000284981	9606.ENSP00000315011	0.076	0	0.9	0.213	0.92
APP	EDN1	9606.ENSP00000284981	9606.ENSP00000368683	0.065	0	0.9	0.269	0.925
APP	CNR1	9606.ENSP00000284981	9606.ENSP00000358513	0.062	0	0.9	0.292	0.927
APP	DRD2	9606.ENSP00000284981	9606.ENSP00000354859	0.063	0	0.9	0.33	0.931
APP	RELA	9606.ENSP00000284981	9606.ENSP00000384273	0	0	0.9	0.408	0.938
APP	VEGFA	9606.ENSP00000284981	9606.ENSP00000478570	0.067	0	0.9	0.44	0.943
APP	F2	9606.ENSP00000284981	9606.ENSP00000308541	0	0.132	0.9	0.413	0.944
APP	SNCA	9606.ENSP00000284981	9606.ENSP00000338345	0.063	0.555	0.9	0.684	0.985
ATP2C1	F7	9606.ENSP00000421326	9606.ENSP00000364731	0	0.123	0	0.742	0.764
BCL2	MAPK1	9606.ENSP00000381185	9606.ENSP00000215832	0	0.379	0.9	0.198	0.945
BCL2	STAT3	9606.ENSP00000381185	9606.ENSP00000264657	0	0.186	0.9	0.225	0.931
BCL2	TP53	9606.ENSP00000381185	9606.ENSP00000269305	0.05	0.525	0.9	0.705	0.984
BCL2	SOD1	9606.ENSP00000381185	9606.ENSP00000270142	0	0.379	0.8	0.117	0.88
BCL2	BCL2L1	9606.ENSP00000381185	9606.ENSP00000302564	0	0.912	0.9	0.633	0.991
BCL2	CASP3	9606.ENSP00000381185	9606.ENSP00000311032	0	0.461	0	0.578	0.763
BCL2	ESR1	9606.ENSP00000381185	9606.ENSP00000405330	0.069	0.064	0.9	0.244	0.925
BCL2L1	MAPK1	9606.ENSP00000302564	9606.ENSP00000215832	0	0	0.9	0.786	0.977
BCL2L1	STAT3	9606.ENSP00000302564	9606.ENSP00000264657	0	0.263	0.9	0.916	0.993
BCL2L1	TP53	9606.ENSP00000302564	9606.ENSP00000269305	0.05	0.912	0.9	0.967	0.999
BCL2L1	RELA	9606.ENSP00000302564	9606.ENSP00000384273	0.082	0.336	0	0.63	0.754
BCL2L1	TNF	9606.ENSP00000302564	9606.ENSP00000398698	0	0.157	0	0.809	0.833
BCL2L1	CASP3	9606.ENSP00000302564	9606.ENSP00000311032	0	0.168	0	0.927	0.937
BCL2L1	CASP9	9606.ENSP00000302564	9606.ENSP00000330237	0.055	0.729	0	0.897	0.971
CASP3	NGFR	9606.ENSP00000311032	9606.ENSP00000172229	0	0	0.9	0.498	0.947
CASP3	MAPK1	9606.ENSP00000311032	9606.ENSP00000215832	0.048	0.261	0	0.757	0.814
CASP3	HMOX1	9606.ENSP00000311032	9606.ENSP00000216117	0	0	0	0.726	0.726
CASP3	STAT3	9606.ENSP00000311032	9606.ENSP00000264657	0	0	0	0.858	0.858
CASP3	TP53	9606.ENSP00000311032	9606.ENSP00000269305	0.061	0	0	0.942	0.944
CASP3	NOS3	9606.ENSP00000311032	9606.ENSP00000297494	0	0	0	0.793	0.793
CASP3	MMP9	9606.ENSP00000311032	9606.ENSP00000361405	0.063	0	0	0.716	0.723
CASP3	VEGFA	9606.ENSP00000311032	9606.ENSP00000478570	0	0	0	0.737	0.737
CASP3	TNF	9606.ENSP00000311032	9606.ENSP00000398698	0	0.302	0	0.825	0.873
CASP3	JUN	9606.ENSP00000311032	9606.ENSP00000360266	0	0.069	0	0.87	0.874
CASP3	CASP9	9606.ENSP00000311032	9606.ENSP00000330237	0.061	0.682	0.9	0.971	0.972
CASP9	MAPK1	9606.ENSP00000330237	9606.ENSP00000215832	0	0.455	0	0.674	0.815
CASP9	TP53	9606.ENSP00000330237	9606.ENSP00000269305	0.061	0	0	0.846	0.849
CASP9	TNF	9606.ENSP00000330237	9606.ENSP00000398698	0	0.092	0	0.687	0.703
CASP9	JUN	9606.ENSP00000330237	9606.ENSP00000360266	0	0.472	0	0.671	0.818
CCL2	MAPK1	9606.ENSP00000225831	9606.ENSP00000215832	0	0	0	0.795	0.795
CCL2	HMOX1	9606.ENSP00000225831	9606.ENSP00000216117	0.094	0	0	0.81	0.821
CCL2	MMP2	9606.ENSP00000225831	9606.ENSP00000219070	0.155	0	0	0.802	0.825
CCL2	SERPINE1	9606.ENSP00000225831	9606.ENSP00000223095	0.122	0	0	0.73	0.752
CCL2	TP53	9606.ENSP00000225831	9606.ENSP00000269305	0	0	0	0.725	0.725
CCL2	MMP9	9606.ENSP00000225831	9606.ENSP00000361405	0.076	0	0	0.843	0.849
CCL2	PTGS2	9606.ENSP00000225831	9606.ENSP00000356438	0.117	0	0	0.847	0.859
CCL2	MMP1	9606.ENSP00000225831	9606.ENSP00000322788	0.102	0.379	0	0.806	0.882
CCL2	VEGFA	9606.ENSP00000225831	9606.ENSP00000478570	0	0	0	0.914	0.914
CCL2	ICAM1	9606.ENSP00000225831	9606.ENSP00000264832	0.149	0	0	0.919	0.929
CCL2	RELA	9606.ENSP00000225831	9606.ENSP00000384273	0	0.379	0.8	0.555	0.939
CCL2	TNF	9606.ENSP00000225831	9606.ENSP00000398698	0.062	0	0	0.969	0.971
CCL2	JUN	9606.ENSP00000225831	9606.ENSP00000360266	0.062	0	0.9	0.792	0.978
CCL2	STAT3	9606.ENSP00000225831	9606.ENSP00000264657	0	0	0.9	0.824	0.981
CCL3	STAT3	9606.ENSP00000477908	9606.ENSP00000264657	0	0	0.9	0.487	0.946
CCL3	TNF	9606.ENSP00000477908	9606.ENSP00000398698	0.407	0	0	0.824	0.891
CCL3	VEGFA	9606.ENSP00000477908	9606.ENSP00000478570	0	0	0	0.792	0.792
CNR1	DRD2	9606.ENSP00000358513	9606.ENSP00000354859	0.089	0	0.9	0.844	0.984
CNR1	CNR2	9606.ENSP00000358513	9606.ENSP00000363596	0	0	0.9	0.923	0.908
CNR2	DRD2	9606.ENSP00000363596	9606.ENSP00000354859	0	0	0.9	0.534	0.951
COL1A1	MMP2	9606.ENSP00000225964	9606.ENSP00000219070	0.89	0.379	0	0.6	0.97
COL1A1	MMP9	9606.ENSP00000225964	9606.ENSP00000361405	0.077	0.328	0	0.605	0.733
CYP2C19	GSTM1	9606.ENSP00000360372	9606.ENSP00000311469	0	0.077	0.65	0.521	0.831
CYP2C19	PTGS1	9606.ENSP00000360372	9606.ENSP00000354612	0.055	0	0.9	0.303	0.928
CYP2C19	PTGS2	9606.ENSP00000360372	9606.ENSP00000356438	0.055	0	0.9	0.286	0.926
ECE1	EDNRA	9606.ENSP00000364028	9606.ENSP00000315011	0	0	0	0.731	0.731
ECE1	EDN3	9606.ENSP00000364028	9606.ENSP00000337128	0	0	0	0.732	0.732
ECE1	EDN1	9606.ENSP00000364028	9606.ENSP00000368683	0.065	0.379	0.9	0.904	0.993
EDN1	MAPK1	9606.ENSP00000368683	9606.ENSP00000215832	0	0	0.9	0.713	0.97
EDN1	HMOX1	9606.ENSP00000368683	9606.ENSP00000216117	0	0	0	0.738	0.738
EDN1	MMP2	9606.ENSP00000368683	9606.ENSP00000219070	0.061	0	0.8	0.738	0.946
EDN1	ICAM1	9606.ENSP00000368683	9606.ENSP00000264832	0.065	0	0	0.801	0.807
EDN1	NOS3	9606.ENSP00000368683	9606.ENSP00000297494	0	0	0	0.941	0.941
EDN1	F2	9606.ENSP00000368683	9606.ENSP00000308541	0	0	0.9	0.52	0.95
EDN1	EDNRA	9606.ENSP00000368683	9606.ENSP00000315011	0	0.707	0.9	0.974	0.999
EDN1	EDN3	9606.ENSP00000368683	9606.ENSP00000337128	0	0	0.9	0.924	0.924
EDN1	PTGS2	9606.ENSP00000368683	9606.ENSP00000356438	0.089	0	0	0.786	0.796
EDN1	JUN	9606.ENSP00000368683	9606.ENSP00000360266	0.073	0	0.9	0.554	0.955
EDN1	MMP9	9606.ENSP00000368683	9606.ENSP00000361405	0	0	0.8	0.763	0.95
EDN1	TNF	9606.ENSP00000368683	9606.ENSP00000398698	0.063	0	0	0.802	0.807
EDN1	VEGFA	9606.ENSP00000368683	9606.ENSP00000478570	0	0	0	0.892	0.892
EDN1	HIF1A	9606.ENSP00000368683	9606.ENSP00000437955	0	0	0.9	0.48	0.945
EDN3	F2	9606.ENSP00000337128	9606.ENSP00000308541	0	0	0.9	0.214	0.918
EDN3	EDNRA	9606.ENSP00000337128	9606.ENSP00000315011	0	0.454	0.9	0.837	0.99
EDNRA	F2	9606.ENSP00000315011	9606.ENSP00000308541	0	0	0.9	0.096	0.905
ESR1	MAPK1	9606.ENSP00000405330	9606.ENSP00000215832	0	0.399	0.9	0.57	0.971
ESR1	STAT3	9606.ENSP00000405330	9606.ENSP00000264657	0	0.386	0	0.773	0.855
ESR1	TP53	9606.ENSP00000405330	9606.ENSP00000269305	0	0.379	0	0.919	0.948
ESR1	NOS3	9606.ENSP00000405330	9606.ENSP00000297494	0	0.472	0.9	0.749	0.985
ESR1	PTGS2	9606.ENSP00000405330	9606.ENSP00000356438	0	0.05	0	0.771	0.773
ESR1	JUN	9606.ENSP00000405330	9606.ENSP00000360266	0	0.472	0.9	0.646	0.979
ESR1	MUC1	9606.ENSP00000405330	9606.ENSP00000484824	0.065	0.379	0	0.64	0.772
ESR1	HIF1A	9606.ENSP00000405330	9606.ENSP00000437955	0	0.413	0	0.695	0.813
ESR1	VEGFA	9606.ENSP00000405330	9606.ENSP00000478570	0.061	0	0	0.813	0.816
F10	F2	9606.ENSP00000364709	9606.ENSP00000308541	0.2	0	0.9	0.806	0.938
F10	F7	9606.ENSP00000364709	9606.ENSP00000364731	0.404	0.379	0.9	0.786	0.964
F2	MAPK1	9606.ENSP00000308541	9606.ENSP00000215832	0	0.053	0.9	0.331	0.931
F2	SERPINE1	9606.ENSP00000308541	9606.ENSP00000223095	0.072	0.435	0	0.736	0.849
F2	PLAU	9606.ENSP00000308541	9606.ENSP00000361850	0	0.379	0.9	0.434	0.952
F7	SERPINE1	9606.ENSP00000364731	9606.ENSP00000223095	0	0.129	0	0.788	0.807
HIF1A	MAPK1	9606.ENSP00000437955	9606.ENSP00000215832	0	0.294	0.8	0.455	0.916
HIF1A	HMOX1	9606.ENSP00000437955	9606.ENSP00000216117	0	0	0	0.729	0.73
HIF1A	MMP2	9606.ENSP00000437955	9606.ENSP00000219070	0	0	0	0.72	0.721
HIF1A	STAT3	9606.ENSP00000437955	9606.ENSP00000264657	0.061	0.434	0.9	0.781	0.986
HIF1A	TP53	9606.ENSP00000437955	9606.ENSP00000269305	0	0.379	0.9	0.674	0.977
HIF1A	NOS3	9606.ENSP00000437955	9606.ENSP00000297494	0	0	0.9	0.706	0.969
HIF1A	JUN	9606.ENSP00000437955	9606.ENSP00000360266	0	0.379	0.9	0.561	0.97
HIF1A	VEGFA	9606.ENSP00000437955	9606.ENSP00000478570	0.062	0.348	0.9	0.947	0.996
HMOX1	MAPK1	9606.ENSP00000216117	9606.ENSP00000215832	0	0	0	0.778	0.779
HMOX1	STAT3	9606.ENSP00000216117	9606.ENSP00000264657	0	0	0	0.714	0.714
HMOX1	SOD1	9606.ENSP00000216117	9606.ENSP00000270142	0	0	0	0.728	0.728
HMOX1	MMP9	9606.ENSP00000216117	9606.ENSP00000361405	0.088	0	0	0.745	0.759
HMOX1	TP53	9606.ENSP00000216117	9606.ENSP00000269305	0.061	0	0	0.761	0.766
HMOX1	TNF	9606.ENSP00000216117	9606.ENSP00000398698	0	0	0	0.816	0.816
HMOX1	PTGS2	9606.ENSP00000216117	9606.ENSP00000356438	0.076	0	0	0.827	0.834
HMOX1	NOS3	9606.ENSP00000216117	9606.ENSP00000297494	0	0.185	0	0.829	0.855
HMOX1	VEGFA	9606.ENSP00000216117	9606.ENSP00000478570	0	0	0	0.867	0.867
HMOX1	JUN	9606.ENSP00000216117	9606.ENSP00000360266	0	0	0.9	0.784	0.977
ICAM1	MAPK1	9606.ENSP00000264832	9606.ENSP00000215832	0	0	0	0.723	0.723
ICAM1	NFKBIA	9606.ENSP00000264832	9606.ENSP00000216797	0.126	0	0	0.769	0.789
ICAM1	MMP2	9606.ENSP00000264832	9606.ENSP00000219070	0	0	0	0.743	0.743
ICAM1	STAT3	9606.ENSP00000264832	9606.ENSP00000264657	0.084	0	0.9	0.749	0.975
ICAM1	NOS3	9606.ENSP00000264832	9606.ENSP00000297494	0	0	0	0.705	0.705
ICAM1	PTGS2	9606.ENSP00000264832	9606.ENSP00000356438	0.123	0	0	0.677	0.705
ICAM1	TP53	9606.ENSP00000264832	9606.ENSP00000269305	0.061	0	0	0.726	0.731
ICAM1	RELA	9606.ENSP00000264832	9606.ENSP00000384273	0.065	0.417	0	0.554	0.735
ICAM1	MMP9	9606.ENSP00000264832	9606.ENSP00000361405	0.093	0	0	0.722	0.737
ICAM1	MUC1	9606.ENSP00000264832	9606.ENSP00000484824	0.076	0	0	0.73	0.74
ICAM1	JUN	9606.ENSP00000264832	9606.ENSP00000360266	0	0	0	0.755	0.755
ICAM1	VEGFA	9606.ENSP00000264832	9606.ENSP00000478570	0	0	0	0.89	0.89
ICAM1	TNF	9606.ENSP00000264832	9606.ENSP00000398698	0.119	0	0	0.957	0.96
JUN	MAPK1	9606.ENSP00000360266	9606.ENSP00000215832	0	0.411	0.9	0.952	0.996
JUN	NFKBIA	9606.ENSP00000360266	9606.ENSP00000216797	0.125	0	0.9	0.671	0.968
JUN	STAT3	9606.ENSP00000360266	9606.ENSP00000264657	0.055	0.476	0	0.852	0.921
JUN	TP53	9606.ENSP00000360266	9606.ENSP00000269305	0	0.127	0.9	0.912	0.991
JUN	NOS3	9606.ENSP00000360266	9606.ENSP00000297494	0	0	0.9	0.542	0.952
JUN	MMP1	9606.ENSP00000360266	9606.ENSP00000322788	0	0.379	0	0.641	0.767
JUN	PTGS2	9606.ENSP00000360266	9606.ENSP00000356438	0.066	0	0	0.704	0.711
JUN	MMP9	9606.ENSP00000360266	9606.ENSP00000361405	0	0.313	0	0.85	0.893
JUN	RELA	9606.ENSP00000360266	9606.ENSP00000384273	0.069	0.457	0.9	0.667	0.98
JUN	VEGFA	9606.ENSP00000360266	9606.ENSP00000478570	0.066	0.261	0.9	0.794	0.983
JUN	TNF	9606.ENSP00000360266	9606.ENSP00000398698	0	0	0.9	0.871	0.986
MAPK1	MMP1	9606.ENSP00000215832	9606.ENSP00000322788	0.049	0	0	0.714	0.717
MAPK1	NOS3	9606.ENSP00000215832	9606.ENSP00000297494	0.05	0	0	0.723	0.726
MAPK1	MMP2	9606.ENSP00000215832	9606.ENSP00000219070	0.049	0	0	0.743	0.746
MAPK1	PTGS2	9606.ENSP00000215832	9606.ENSP00000356438	0	0.266	0	0.678	0.753
MAPK1	MMP9	9606.ENSP00000215832	9606.ENSP00000361405	0.049	0	0	0.797	0.799
MAPK1	TNF	9606.ENSP00000215832	9606.ENSP00000398698	0	0	0	0.836	0.836
MAPK1	TTR	9606.ENSP00000215832	9606.ENSP00000237014	0	0	0.9	0.185	0.915
MAPK1	VCP	9606.ENSP00000215832	9606.ENSP00000351777	0.145	0.309	0.9	0.204	0.946
MAPK1	RELA	9606.ENSP00000215832	9606.ENSP00000384273	0	0	0.9	0.541	0.952
MAPK1	NFKBIA	9606.ENSP00000215832	9606.ENSP00000216797	0	0.185	0.9	0.561	0.961
MAPK1	TP53	9606.ENSP00000215832	9606.ENSP00000269305	0.055	0.532	0.8	0.859	0.985
MAPK1	STAT3	9606.ENSP00000215832	9606.ENSP00000264657	0.06	0.384	0.9	0.837	0.989
MMP1	MMP2	9606.ENSP00000322788	9606.ENSP00000219070	0.154	0	0.9	0.921	0.922
MMP1	STAT3	9606.ENSP00000322788	9606.ENSP00000264657	0	0	0.9	0.674	0.966
MMP1	TP53	9606.ENSP00000322788	9606.ENSP00000269305	0	0	0	0.707	0.707
MMP1	TNF	9606.ENSP00000322788	9606.ENSP00000398698	0.063	0	0	0.794	0.798
MMP1	VEGFA	9606.ENSP00000322788	9606.ENSP00000478570	0.069	0	0	0.827	0.832
MMP1	MMP9	9606.ENSP00000322788	9606.ENSP00000361405	0.518	0	0.9	0.91	0.961
MMP12	TNF	9606.ENSP00000458585	9606.ENSP00000398698	0.062	0	0	0.72	0.727
MMP2	PTGS2	9606.ENSP00000219070	9606.ENSP00000356438	0.066	0	0	0.696	0.704
MMP2	SERPINE1	9606.ENSP00000219070	9606.ENSP00000223095	0.213	0	0	0.669	0.728
MMP2	PLAU	9606.ENSP00000219070	9606.ENSP00000361850	0.152	0	0	0.7	0.734
MMP2	TNF	9606.ENSP00000219070	9606.ENSP00000398698	0	0	0	0.798	0.798
MMP2	TP53	9606.ENSP00000219070	9606.ENSP00000269305	0.062	0	0	0.797	0.802
MMP2	MMP9	9606.ENSP00000219070	9606.ENSP00000361405	0.061	0	0.9	0.958	0.908
MMP2	STAT3	9606.ENSP00000219070	9606.ENSP00000264657	0	0	0.9	0.799	0.979
MMP2	VEGFA	9606.ENSP00000219070	9606.ENSP00000478570	0.065	0	0.8	0.899	0.979
MMP9	SERPINE1	9606.ENSP00000361405	9606.ENSP00000223095	0.061	0	0	0.707	0.714
MMP9	STAT3	9606.ENSP00000361405	9606.ENSP00000264657	0	0	0.9	0.824	0.981
MMP9	TP53	9606.ENSP00000361405	9606.ENSP00000269305	0	0	0	0.8	0.8
MMP9	NOS3	9606.ENSP00000361405	9606.ENSP00000297494	0.062	0	0	0.778	0.783
MMP9	PTGS2	9606.ENSP00000361405	9606.ENSP00000356438	0.097	0	0	0.725	0.741
MMP9	PLAU	9606.ENSP00000361405	9606.ENSP00000361850	0.076	0	0	0.713	0.724
MMP9	RELA	9606.ENSP00000361405	9606.ENSP00000384273	0	0.344	0	0.683	0.783
MMP9	TNF	9606.ENSP00000361405	9606.ENSP00000398698	0.176	0	0	0.935	0.944
MMP9	VEGFA	9606.ENSP00000361405	9606.ENSP00000478570	0	0	0.8	0.946	0.989
MUC1	STAT3	9606.ENSP00000484824	9606.ENSP00000264657	0	0	0.9	0.682	0.966
MUC1	TP53	9606.ENSP00000484824	9606.ENSP00000269305	0	0.379	0	0.817	0.881
NEFH	NEFL	9606.ENSP00000311997	9606.ENSP00000482169	0.183	0.584	0	0.955	0.71
NEFL	SOD1	9606.ENSP00000482169	9606.ENSP00000270142	0	0	0.8	0.559	0.908
NFKBIA	NGFR	9606.ENSP00000216797	9606.ENSP00000172229	0	0	0.9	0.104	0.906
NFKBIA	TP53	9606.ENSP00000216797	9606.ENSP00000269305	0	0.454	0	0.515	0.723
NFKBIA	PTGS2	9606.ENSP00000216797	9606.ENSP00000356438	0.076	0	0	0.794	0.801
NFKBIA	TNF	9606.ENSP00000216797	9606.ENSP00000398698	0.152	0.379	0.9	0.874	0.992
NFKBIA	RELA	9606.ENSP00000216797	9606.ENSP00000384273	0.084	0.953	0.9	0.77	0.998
NGFR	VEGFA	9606.ENSP00000172229	9606.ENSP00000478570	0	0	0.6	0.643	0.851
NGFR	RELA	9606.ENSP00000172229	9606.ENSP00000384273	0	0	0.9	0.124	0.908
NGFR	TP53	9606.ENSP00000172229	9606.ENSP00000269305	0	0.379	0.9	0.709	0.98
NOS3	TP53	9606.ENSP00000297494	9606.ENSP00000269305	0	0	0	0.731	0.731
NOS3	TNF	9606.ENSP00000297494	9606.ENSP00000398698	0.061	0	0	0.828	0.832
NOS3	PTGS2	9606.ENSP00000297494	9606.ENSP00000356438	0	0.261	0	0.786	0.835
NOS3	VEGFA	9606.ENSP00000297494	9606.ENSP00000478570	0.062	0	0.9	0.934	0.993
PLAU	SERPINE1	9606.ENSP00000361850	9606.ENSP00000223095	0.214	0.881	0.9	0.926	0.999
PTGS1	PTGS2	9606.ENSP00000354612	9606.ENSP00000356438	0.14	0.379	0.8	0.956	0.889
PTGS2	STAT3	9606.ENSP00000356438	9606.ENSP00000264657	0	0	0.9	0.81	0.98
PTGS2	TP53	9606.ENSP00000356438	9606.ENSP00000269305	0	0.379	0	0.869	0.915
PTGS2	VEGFA	9606.ENSP00000356438	9606.ENSP00000478570	0.082	0	0	0.914	0.918
PTGS2	TNF	9606.ENSP00000356438	9606.ENSP00000398698	0.096	0	0	0.921	0.926
RELA	STAT3	9606.ENSP00000384273	9606.ENSP00000264657	0.108	0.379	0	0.794	0.876
RELA	TP53	9606.ENSP00000384273	9606.ENSP00000269305	0.061	0.313	0	0.796	0.857
RELA	TNF	9606.ENSP00000384273	9606.ENSP00000398698	0	0.428	0.9	0.849	0.99
SERPINE1	TP53	9606.ENSP00000223095	9606.ENSP00000269305	0	0	0	0.797	0.797
SERPINE1	TNF	9606.ENSP00000223095	9606.ENSP00000398698	0.062	0	0	0.86	0.863
SERPINE1	VEGFA	9606.ENSP00000223095	9606.ENSP00000478570	0.076	0	0.9	0.821	0.982
SNCA	SOD1	9606.ENSP00000338345	9606.ENSP00000270142	0	0	0	0.734	0.734
SOD1	VEGFA	9606.ENSP00000270142	9606.ENSP00000478570	0.063	0	0	0.709	0.716
SOD1	VCP	9606.ENSP00000270142	9606.ENSP00000351777	0.065	0.044	0	0.717	0.725
STAT3	TNF	9606.ENSP00000264657	9606.ENSP00000398698	0	0	0.9	0.774	0.976
STAT3	TP53	9606.ENSP00000264657	9606.ENSP00000269305	0	0	0.9	0.87	0.986
STAT3	VEGFA	9606.ENSP00000264657	9606.ENSP00000478570	0	0.434	0.9	0.916	0.994
TNF	TP53	9606.ENSP00000398698	9606.ENSP00000269305	0	0	0	0.824	0.825
TNF	VEGFA	9606.ENSP00000398698	9606.ENSP00000478570	0	0	0	0.919	0.919
TP53	VEGFA	9606.ENSP00000269305	9606.ENSP00000478570	0	0	0	0.918	0.918
TTR	VCP	9606.ENSP00000237014	9606.ENSP00000351777	0	0.354	0.9	0.173	0.941
